# Supplementary material for: Inhibition of hydrocarbon autoxidation by nitroxide-catalyzed cross-dismutation of hydroperoxyl and alkylperoxyl radicals
Source: PubMed Central journal article supplement — Chem Sci. 2018 Jun 11;9(28):6068–79. doi: 10.1039/c8sc01575a (PMC6053651; doi:10.1039/c8sc01575a), 2018-06-11
Supplement: SC-009-C8SC01575A-s001.pdf [file SC-009-C8SC01575A-s001.pdf]

# Inhibition of Hydrocarbon Autoxidation by Nitroxide-Catalyzed Cross-Dismutation of Hydroperoxyl and Alkylperoxyl Radicals

Kareem A. Harrison, Evan A. Haidasz, Markus Griesser and Derek A. Pratt\*

*Department of Chemistry and Biomolecular Sciences, University of Ottawa,  
Ottawa, Ontario, CANADA K1N 6N5*

\*dpratt@uottawa.ca

## Supplementary Information

### Table of Contents

|                                                                                                             |     |
|-------------------------------------------------------------------------------------------------------------|-----|
| I. General.....                                                                                             | S2  |
| II. Co-autoxidations of Cumene and Styrene under Thomas' Conditions .....                                   | S3  |
| III. Co-autoxidations of Styrene at 37 °C .....                                                             | S4  |
| IV. UV-vis Spectra and Extinction Coefficients for STY-BODIPY and PBD-BODIPY ....                           | S5  |
| V. Rate of Initiation Determination by the Inhibitor Method.....                                            | S10 |
| VI. Propagation Rate Constant Determination for STY-BODIPY and PBD-BODIPY under<br>Various Conditions ..... | S12 |
| VII. Supplemental Data for KIE and KSE Determinations.....                                                  | S17 |
| VIII. Monitoring of Nitroxide Formation from Diarylamine during Autoxidations.....                          | S18 |
| IX. Autoxidations of Deuterated Cyclooctene .....                                                           | S18 |
| X. Representative NMR Spectra of Deuterated Cyclooctene .....                                               | S23 |
| XI. Computational Data .....                                                                                | S24 |
| XII. References.....                                                                                        | S74 |

## **I. General**

Reagents were purchased from commercial suppliers and used without further purification unless otherwise indicated. TEMPOH,<sup>1</sup> Ar<sub>2</sub>NH,<sup>2</sup> Ar<sub>2</sub>NO,<sup>3</sup> Ar<sub>2</sub>NOH,<sup>4</sup> Ar<sub>2</sub>NOR,<sup>5</sup> TEMPOR,<sup>5</sup> 1-bromocyclooctene,<sup>6</sup> cyclooctyne,<sup>7</sup> STY-BODIPY<sup>8</sup> and PBD-BODIPY<sup>8</sup> were synthesized using literature procedures. Column chromatography was carried out using flash silica gel (40–63 μm, 230–400 mesh). UV–vis spectra and kinetics were measured on a Cary 100 UV–vis spectrophotometer equipped with a temperature controller unit and a thermostated 6 × 6 multicell holder. <sup>1</sup>H and <sup>13</sup>C NMR spectra were recorded on Bruker AVANCE spectrometers at 400 and 75 MHz, respectively. <sup>1</sup>H and <sup>13</sup>C (with <sup>1</sup>H decoupling) NMR resonances are referenced to CHCl<sub>3</sub>/CDCl<sub>3</sub> (7.26 and 77 ppm, respectively). High resolution mass spectra were obtained on a Kratos Concept Tandem mass spectrometer. All synthesized compounds were > 95% pure as determined by <sup>1</sup>H NMR.

Cumene and styrene were each extracted three times with NaOH (1M), washed with brine, dried with MgSO<sub>4</sub>, filtered, distilled under reduced pressure and percolated through a silica column. The purified material could be kept at -20 °C under nitrogen for up to 5 days. Immediately before use, the distilled material was percolated again through a column with silica/basic alumina (1:2). Ethylbenzene and 1-hexadecene were percolated through a column with silica/basic alumina (1:2) immediately before use. Cyclooctene was distilled under reduced pressure (50 mbar/80 °C) and the purified material could be kept at -20 °C under nitrogen for up to 5 days. Norbornene was distilled at atmospheric pressure (120 °C) through a short distillation path and the purified material could be kept at -20 °C under nitrogen for up to 5 days. Dioxane was used directly without prior purification.

## II. Co-oxidations of Cumene and Styrene under Thomas' Conditions

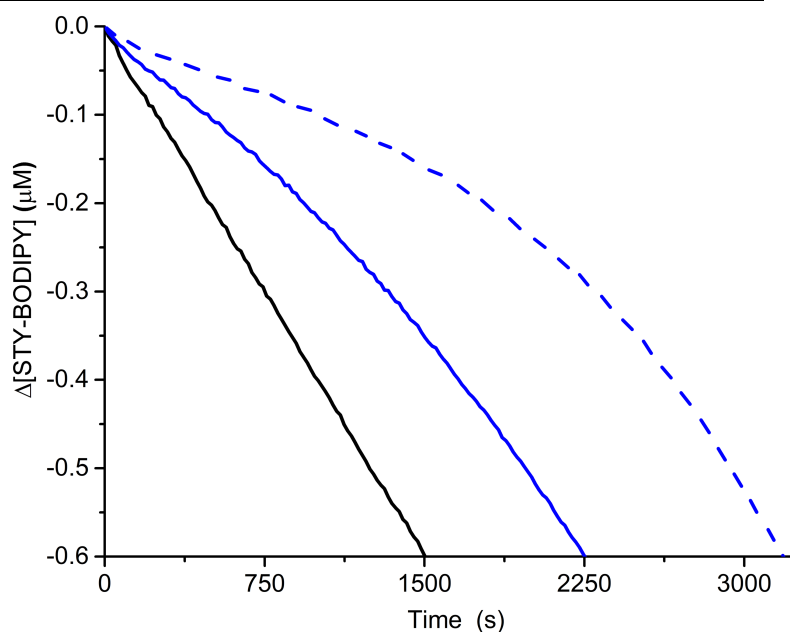

**Figure S1.** Representative co-oxidations of cumene (0.29 M) and STY-BODIPY (10  $\mu\text{M}$ ) in PhCl initiated with AIBN (1 mM) at 70  $^{\circ}\text{C}$  (black) inhibited by 50  $\mu\text{M}$  of  $\text{Ar}_2\text{NO}$  (blue) and  $\text{Ar}_2\text{NH}$  (blue dash). Reaction progress was monitored at 570 nm ( $\epsilon = 122\,213\ \text{M}^{-1}\ \text{cm}^{-1}$ ).

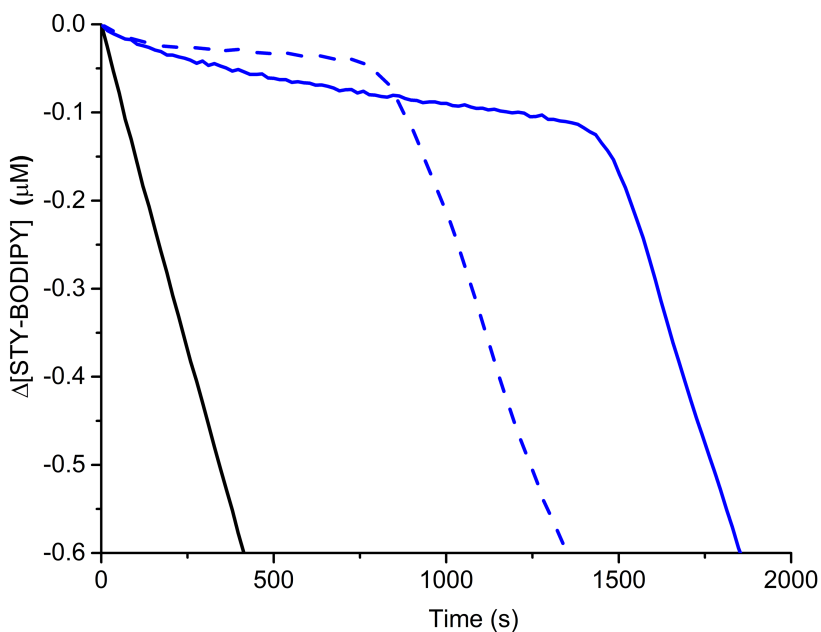

**Figure S2.** Representative co-oxidations of styrene (3.5 M) and STY-BODIPY (10  $\mu\text{M}$ ) in PhCl initiated with AIBN (1 mM) at 70  $^{\circ}\text{C}$  (black) inhibited by 50  $\mu\text{M}$  of  $\text{Ar}_2\text{NO}$  (blue) and  $\text{Ar}_2\text{NH}$  (blue dash). Reaction progress was monitored at 571 nm ( $\epsilon = 97\,235\ \text{M}^{-1}\ \text{cm}^{-1}$ ).

### III. Co-oxidations of Styrene at 37 °C

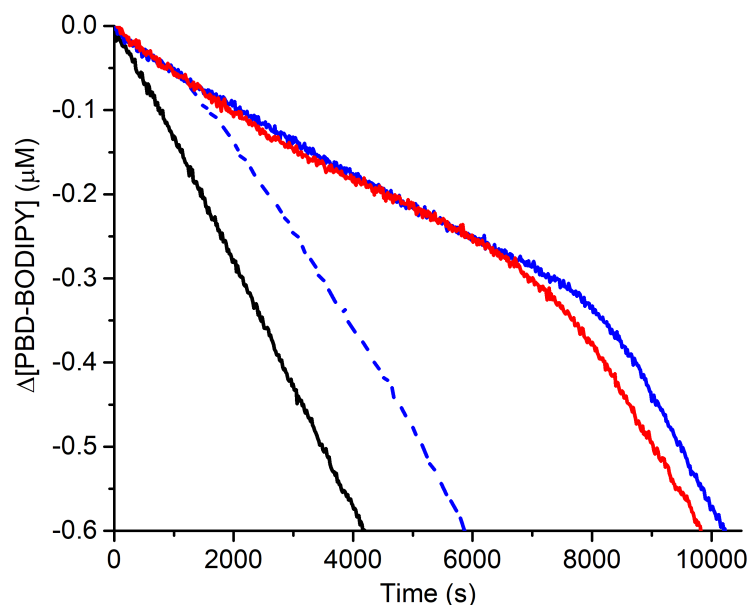

**Figure S3.** Representative co-oxidations of styrene (4.3 M) and PBD-BODIPY (10  $\mu\text{M}$ ) in PhCl initiated with AIBN (6 mM) at 37 °C (black) inhibited by 2  $\mu\text{M}$  of  $\text{Ar}_2\text{NH}$  (blue dashed line),  $\text{Ar}_2\text{NO}$  (blue line), and TEMPO (red line). Reaction progress was monitored at 591 nm ( $\epsilon = 139\,000\ \text{M}^{-1}\ \text{cm}^{-1}$ ).

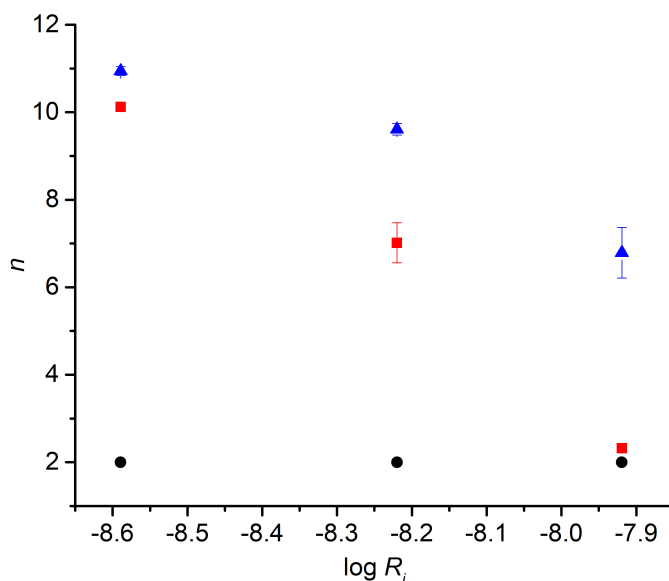

**Figure S4.** Stoichiometry of peroxy radical-trapping by  $\text{Ar}_2\text{NO}$  (blue), TEMPO (red) and PMC (black) as a function of rate of initiation of styrene (4.3 M) and PBD-BODIPY (10  $\mu\text{M}$ ) co-oxidations initiated by AIBN (6, 15, and 30 mM) at 37 °C. Reaction progress was monitored at 591 nm ( $\epsilon = 139\,000\ \text{M}^{-1}\ \text{cm}^{-1}$ ).

#### IV. UV-vis Spectra and Extinction Coefficients for STY-BODIPY and PBD-BODIPY

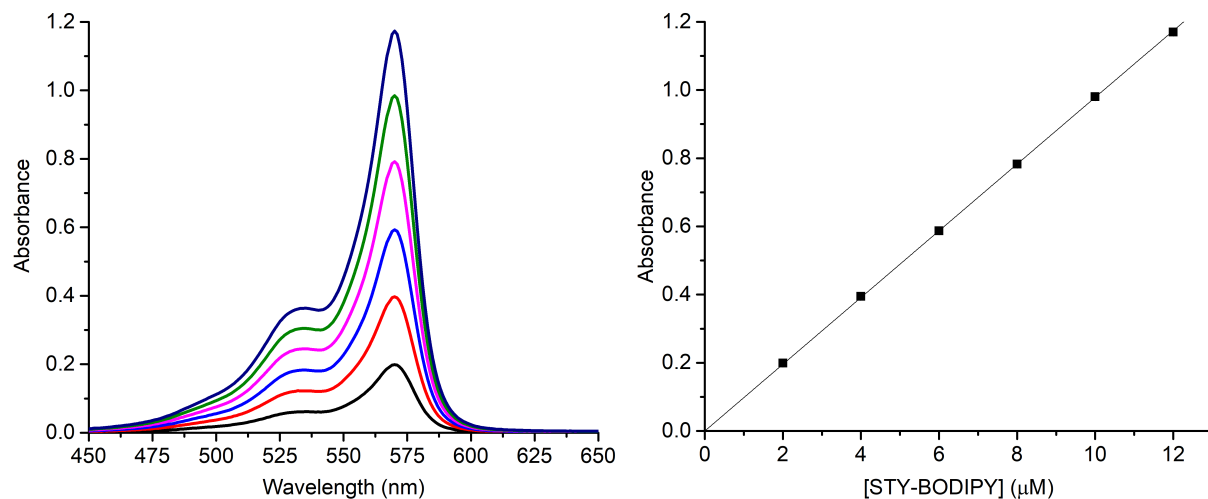

**Figure S5.** UV-vis spectra for STY-BODIPY (2-12  $\mu\text{M}$ ) in 40% v/v styrene/PhCl (left). Extinction coefficient determined for  $\lambda_{\max} = 571$  nm of  $\varepsilon = 97\,235\text{ M}^{-1}\text{ cm}^{-1}$  (right). Average of three measurements (error bars are too small to be resolved from the data points).

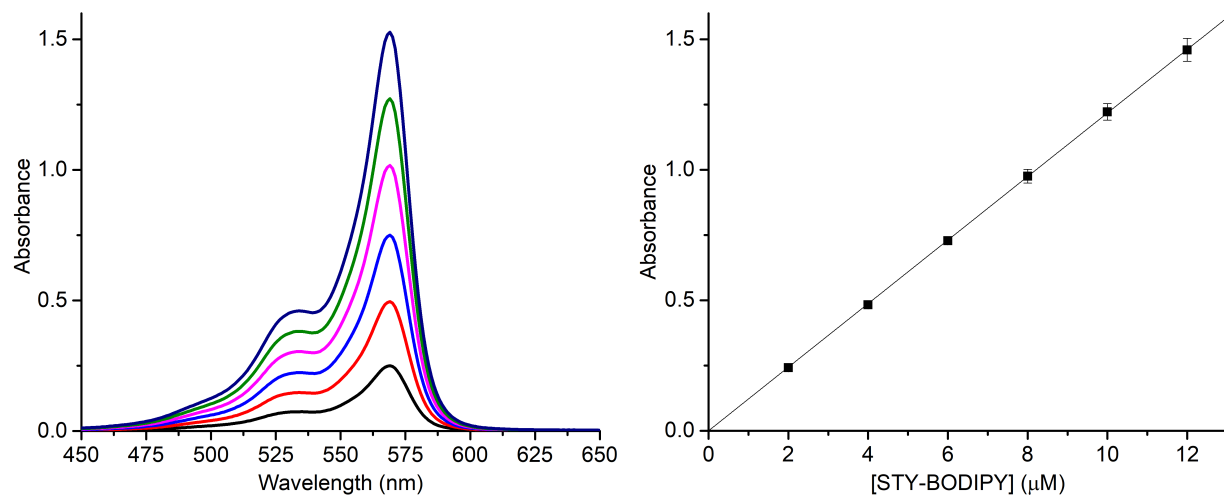

**Figure S6.** UV-vis spectra for STY-BODIPY (2-12  $\mu\text{M}$ ) in 40% v/v cumene/PhCl (left). Extinction coefficient determined for  $\lambda_{\max} = 570$  nm of  $\varepsilon = 112\,213\text{ M}^{-1}\text{ cm}^{-1}$  (right). Average of three measurements (error bars are too small to be resolved from the data points).

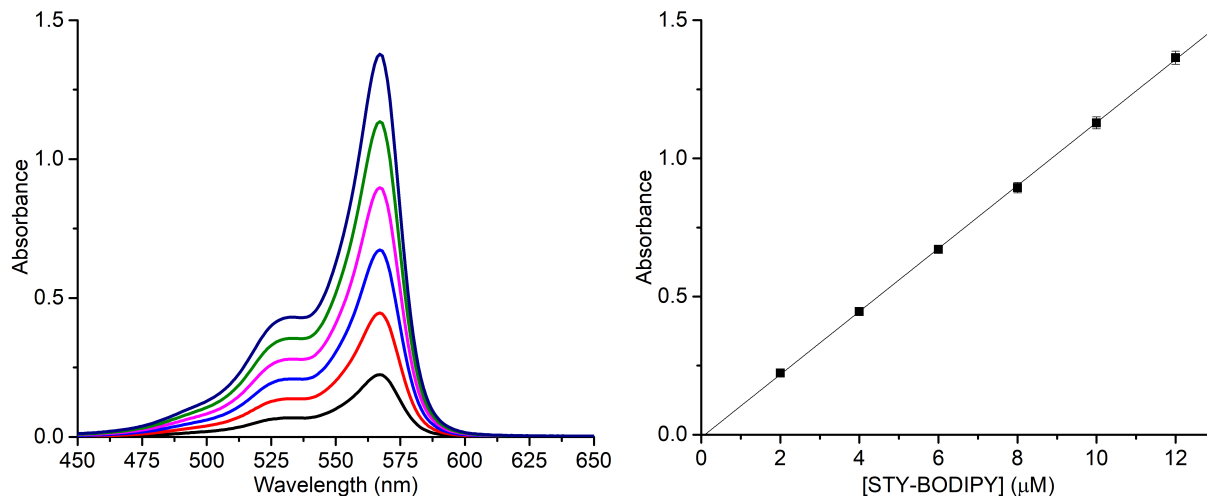

**Figure S7.** UV-vis spectra for STY-BODIPY (2-12  $\mu\text{M}$ ) in 40% v/v dioxane/PhCl (left). Extinction coefficient determined for  $\lambda_{\max} = 568$  nm of  $\varepsilon = 113\,982\text{ M}^{-1}\text{ cm}^{-1}$  (right). Average of three measurements (error bars are too small to be resolved from the data points).

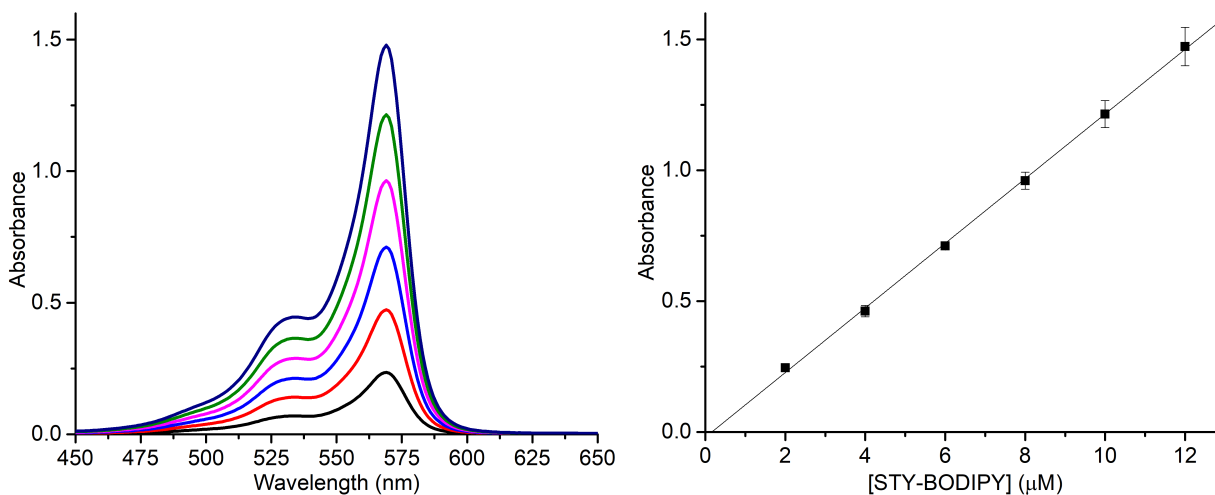

**Figure S8.** UV-vis spectra for STY-BODIPY (2-12  $\mu\text{M}$ ) in 40% v/v ethylbenzene/PhCl (left). Extinction coefficient determined for  $\lambda_{\max} = 569$  nm of  $\varepsilon = 123\,481\text{ M}^{-1}\text{ cm}^{-1}$  (right). Average of three measurements (error bars are too small to be resolved from the data points).

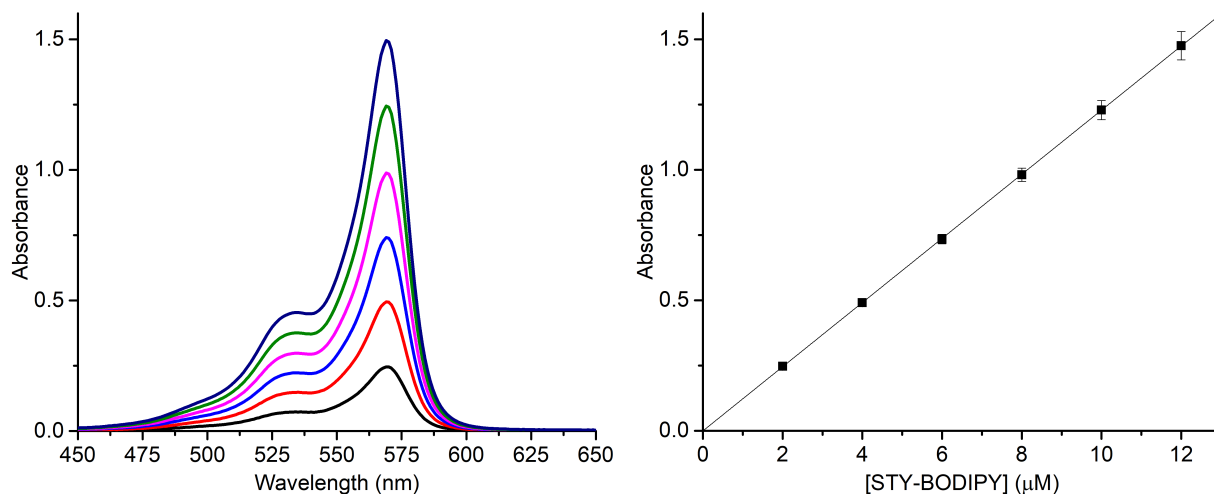

**Figure S9.** UV-vis spectra for STY-BODIPY (2-12  $\mu\text{M}$ ) in 1 M norbornene in PhCl (left). Extinction coefficient determined for  $\lambda_{\max} = 569$  nm of  $\epsilon = 122\,873\text{ M}^{-1}\text{ cm}^{-1}$  (right). Average of three measurements (error bars are too small to be resolved from the data points).

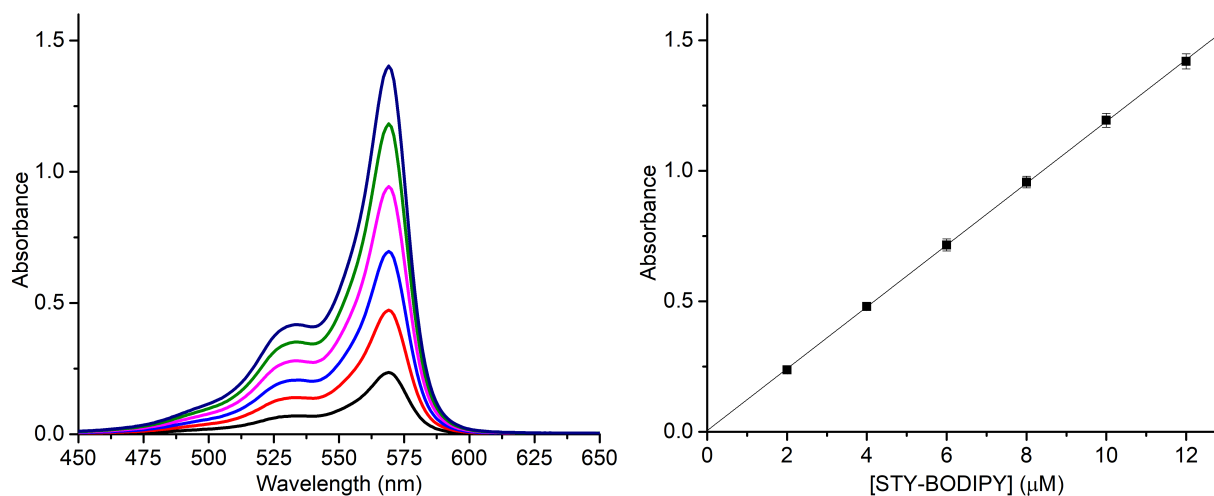

**Figure S10.** UV-vis spectra for STY-BODIPY (2-12  $\mu\text{M}$ ) in 40% v/v cyclooctene/PhCl (left). Extinction coefficient determined for  $\lambda_{\max} = 568$  nm of  $\epsilon = 118\,405\text{ M}^{-1}\text{ cm}^{-1}$  (right). Average of three measurements (error bars are too small to be resolved from the data points).

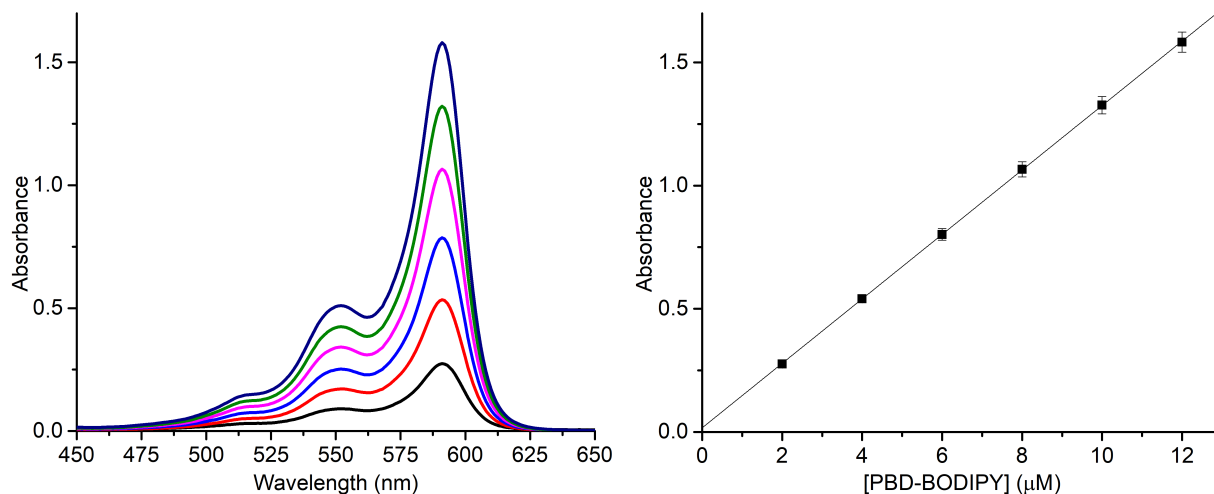

**Figure S11.** UV-vis spectra for PBD-BODIPY (2-12  $\mu\text{M}$ ) in 2.5% v/v 1,4-cyclohexadiene/PhCl (left). Extinction coefficient determined for  $\lambda_{\text{max}} = 591 \text{ nm}$  of  $\epsilon = 130\,797 \text{ M}^{-1} \text{ cm}^{-1}$  (right). Average of three measurements (error bars are too small to be resolved from the data points).

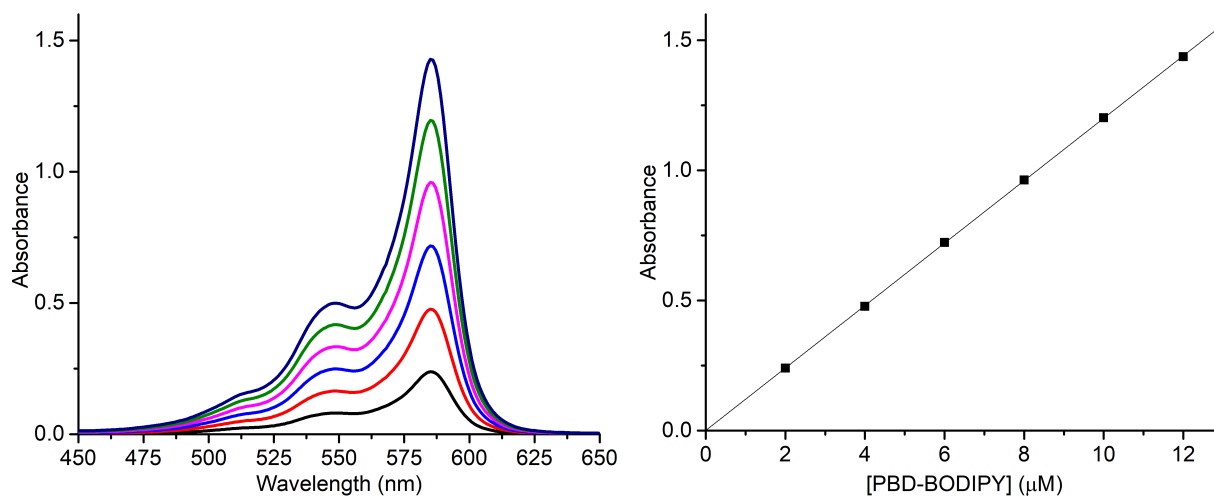

**Figure S12.** UV-vis spectra for STY-BODIPY (2-12  $\mu\text{M}$ ) in 80% v/v 1-hexadecene/PhCl (left). Extinction coefficient determined for  $\lambda_{\text{max}} = 591 \text{ nm}$  of  $\epsilon = 119\,166 \text{ M}^{-1} \text{ cm}^{-1}$  (right). Average of three measurements (error bars are too small to be resolved from the data points).



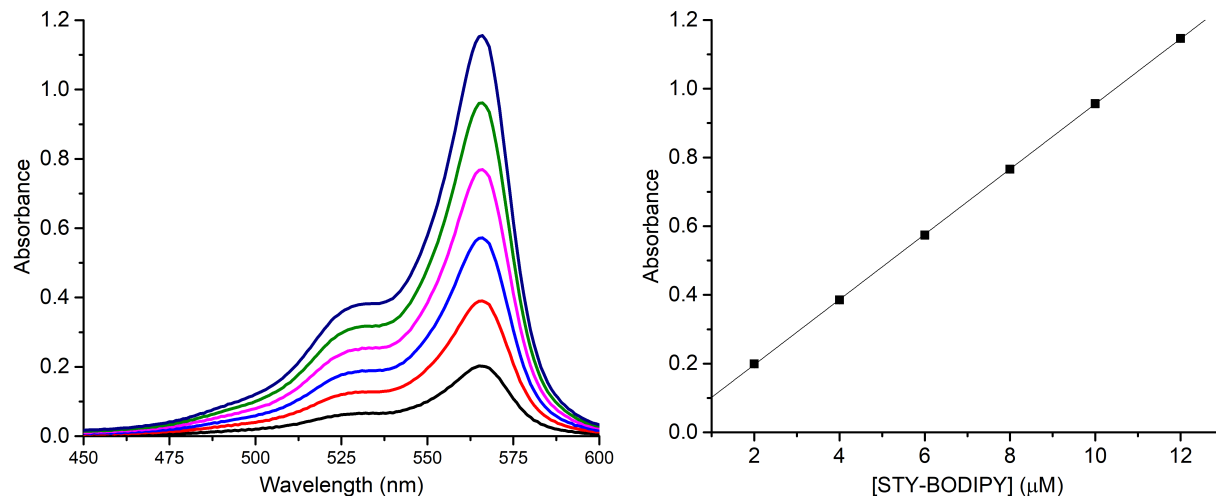

**Figure S13.** UV-vis spectra for STY-BODIPY (2-12  $\mu\text{M}$ ) in 40% v/v styrene/2-octanone (left). Extinction coefficient determined for  $\lambda_{\text{max}} = 566 \text{ nm}$  of  $\epsilon = 94\,876 \text{ M}^{-1} \text{ cm}^{-1}$  (right). Average of three measurements (error bars are too small to be resolved from the data points).

## V. Determination of the Rate of Initiation by the Inhibitor Method

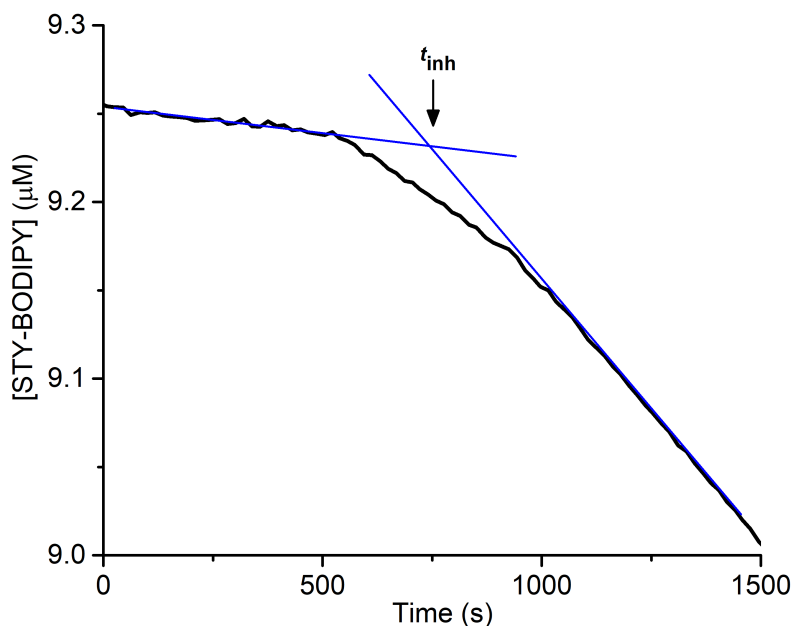

**Figure S14.** Identification of the inhibited period from a representative co-oxidation of styrene (3.5 M) and STY-BODIPY (10  $\mu\text{M}$ ) in PhCl initiated with di-*tert*-butylperoxide (218 mM) at 70  $^{\circ}\text{C}$  inhibited by PMC (4.0  $\mu\text{M}$ ). Reaction progress was monitored by absorbance at 571 nm ( $\epsilon = 97\,235\text{ M}^{-1}\text{ cm}^{-1}$ ). From the average of three measurements  $t_{\text{inh}} = 884\text{ s}$  and  $R_i = 4.5 \pm 0.3 \times 10^{-9}\text{ M s}^{-1}$  was calculated from  $2[\text{PMC}]/t_{\text{inh}}$ .

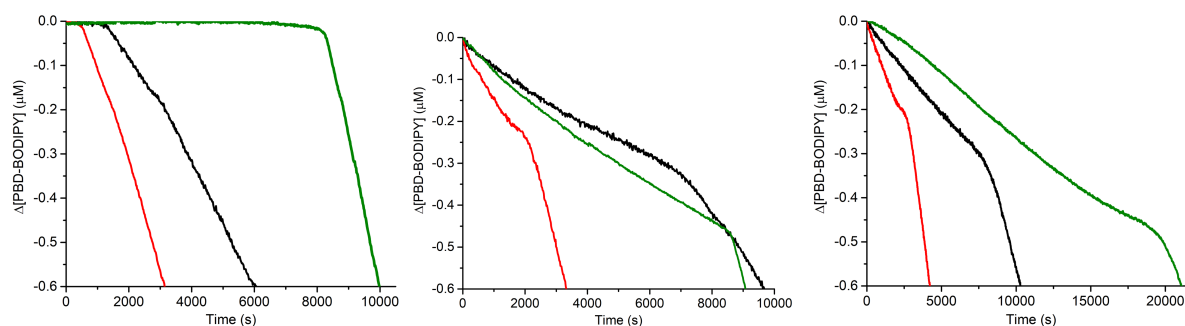

**Figure S15.** Representative co-oxidations of styrene (4.3 M) and PBD-BODIPY (10  $\mu\text{M}$ ) in PhCl at 37  $^{\circ}\text{C}$ , initiated with AIBN (6 (black), 15 (red) mM) inhibited by 2.0  $\mu\text{M}$  of PMC (left) or 2.0  $\mu\text{M}$  TEMPO (middle) and 2.0  $\mu\text{M}$  of  $\text{Ar}_2\text{NO}$  (right) or initiated with 30 mM AIBN (green) inhibited by 50  $\mu\text{M}$  PMC (left), TEMPO (middle) or  $\text{Ar}_2\text{NO}$  (right). Reaction progress was monitored at 591 nm ( $\epsilon = 139\,000\text{ M}^{-1}\text{ cm}^{-1}$ ).

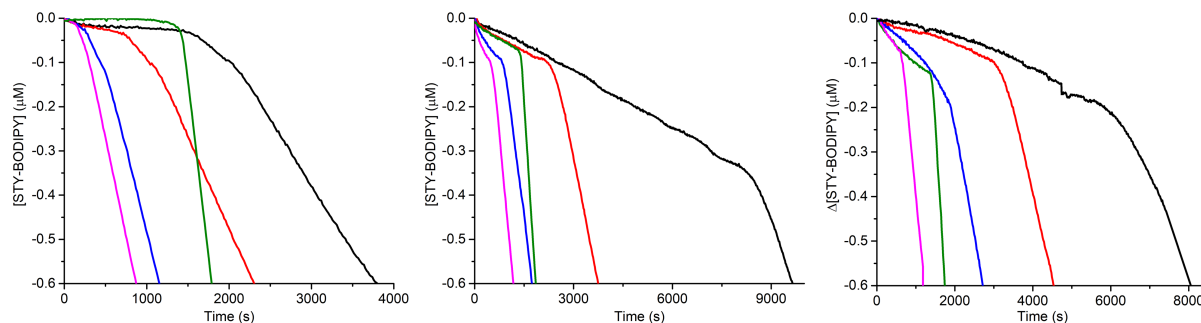

**Figure S16.** Representative co-oxidations of styrene (3.5 M) and STY-BODIPY (10  $\mu\text{M}$ ) in PhCl at 70  $^{\circ}\text{C}$ , initiated with AIBN (62.5 (black), 125 (red), 250 (blue), 375 (magenta)  $\mu\text{M}$ ) inhibited by 4.0  $\mu\text{M}$  of PMC (left) or 2.0  $\mu\text{M}$  TEMPO (middle) and 2.0  $\mu\text{M}$  of  $\text{Ar}_2\text{NO}$  (right) or initiated with 1 mM AIBN (green) inhibited by 50  $\mu\text{M}$  PMC (left), TEMPO (middle) or  $\text{Ar}_2\text{NO}$  (right). Reaction progress was monitored at 571 nm ( $\epsilon = 97\,235\text{ M}^{-1}\text{ cm}^{-1}$ ).

**Table 1.** Rates of Initiation Obtained from PMC-Inhibited Autoxidations Under Various Conditions.

| substrate          | T ( $^{\circ}\text{C}$ ) | solvent    | initiator                  | [initiator] (mM)      | $R_i$ ( $\text{M s}^{-1}$ )  |
|--------------------|--------------------------|------------|----------------------------|-----------------------|------------------------------|
| styrene            | 37                       | PhCl       | AIBN                       | 6                     | $2.6 \pm 0.2 \times 10^{-9}$ |
| styrene            | 37                       | PhCl       | AIBN                       | 15                    | $6.0 \pm 0.2 \times 10^{-9}$ |
| styrene            | 37                       | PhCl       | AIBN                       | 30                    | $1.2 \pm 0.4 \times 10^{-8}$ |
| styrene            | 70                       | PhCl       | $^t\text{BuOO}^t\text{Bu}$ | 218                   | $4.5 \pm 0.3 \times 10^{-9}$ |
| styrene            | 70                       | 2-octanone | $^t\text{BuOO}^t\text{Bu}$ | 218                   | $4.2 \pm 0.2 \times 10^{-9}$ |
| styrene            | 70                       | PhCl       | AIBN                       | $6.25 \times 10^{-3}$ | $3.7 \pm 0.3 \times 10^{-9}$ |
| styrene            | 70                       | PhCl       | AIBN                       | $1.25 \times 10^{-2}$ | $7.2 \pm 0.2 \times 10^{-9}$ |
| styrene            | 70                       | PhCl       | AIBN                       | $2.50 \times 10^{-2}$ | $1.4 \pm 0.1 \times 10^{-8}$ |
| styrene            | 70                       | PhCl       | AIBN                       | $3.75 \times 10^{-2}$ | $1.9 \pm 0.2 \times 10^{-8}$ |
| styrene            | 70                       | PhCl       | AIBN                       | 1                     | $6.1 \pm 0.1 \times 10^{-8}$ |
| cumene             | 70                       | PhCl       | AIBN                       | 1                     | $6.1 \pm 0.3 \times 10^{-8}$ |
| 1,4-dioxane        | 70                       | PhCl       | $^t\text{BuOO}^t\text{Bu}$ | 218                   | $5.6 \pm 0.1 \times 10^{-9}$ |
| ethylbenzene       | 70                       | PhCl       | $^t\text{BuOO}^t\text{Bu}$ | 87                    | $3.0 \pm 0.1 \times 10^{-9}$ |
| norbornene         | 70                       | PhCl       | $^t\text{BuOO}^t\text{Bu}$ | 218                   | $7.5 \pm 0.4 \times 10^{-9}$ |
| cyclooctene        | 70                       | PhCl       | $^t\text{BuOO}^t\text{Bu}$ | 218                   | $4.5 \pm 0.2 \times 10^{-9}$ |
| 1-hexadecene       | 70                       | PhCl       | $^t\text{BuOO}^t\text{Bu}$ | 87                    | $1.1 \pm 0.1 \times 10^{-9}$ |
| 1-hexadecene       | 100                      | PhCl       | dicumyl peroxide           | 1                     | $4.6 \pm 0.4 \times 10^{-9}$ |
| 1,4-cyclohexadiene | 30                       | PhCl       | $^t\text{BuOO}^t\text{Bu}$ | 218                   | N/A                          |

## VI. Determination of Propagation Rate Constants for STY-BODIPY/PBD-BODIPY

The propagation rate constants for dye autoxidation, i.e.  $k_{\text{STY-BODIPY}}$  (or  $k_{\text{PBD-BODIPY}}$ ), are necessary to derive the inhibition rate constants ( $k_{\text{inh}}$ ) of the RTAs in the various co-autoxidation systems reported in the manuscript (as in Figure 2B). These values were derived from the expression which describes the kinetics of an uninhibited autoxidation, e.g. for STY-BODIPY:

$$\frac{-\partial[\text{STY-BODIPY}]}{\partial t} = \frac{k_{\text{STY-BODIPY}}}{\sqrt{2k_t}} \sqrt{R_i} [\text{STY-BODIPY}]$$

Thus, a series of uninhibited co-autoxidations were carried out at different dye concentrations for each dye/substrate combination reported in the manuscript, and the rate of dye consumption plotted as a function of dye concentration (see Figures S17-S23). The  $k_{\text{STY-BODIPY}}$  (or  $k_{\text{PBD-BODIPY}}$ ) was derived from the slope of the line of best fit using the rate of initiation,  $R_i$ , which was independently determined for each of the various co-autoxidation systems (given in Table 1) and the termination rate constant. Since the dye is present at a very small concentration relative to the substrate, it is assumed that termination occurs via the reaction of two substrate-derived peroxy radicals (see ref. 8 for further discussion of this assumption). Termination rate constants measured by Howard and Ingold at 30 °C are available for styrene ( $2.1 \times 10^7 \text{ M}^{-1} \text{ s}^{-1}$ ),<sup>9</sup> dioxane ( $2.5 \times 10^7 \text{ M}^{-1} \text{ s}^{-1}$ ),<sup>10</sup> ethylbenzene ( $1.6 \times 10^7 \text{ M}^{-1} \text{ s}^{-1}$ )<sup>11</sup> and 1-octene ( $1.3 \times 10^8 \text{ M}^{-1} \text{ s}^{-1}$ ).<sup>12</sup> Corresponding values at 70°C were estimated by extrapolation based upon the known activation energy for termination of two secondary (butyl)peroxy radicals ( $2.7 \text{ kcal mol}^{-1}$ ).<sup>13</sup> Termination rate constants have not been previously determined for norbornene and cyclooctene, and as such, were assumed to be the same as styrene.

**Table S2.** Termination rate constants ( $k_t$ ) used in this work.

| substrate                 | $k_t$ (in $\text{M}^{-1} \text{ s}^{-1}$ ) at given $T$ | $k_t$ (in $\text{M}^{-1} \text{ s}^{-1}$ ) at 30 °C |
|---------------------------|---------------------------------------------------------|-----------------------------------------------------|
| styrene                   | $3.4 \times 10^7$ (70 °C)                               | $2.1 \times 10^7 \text{ M}^{-1} \text{ s}^{-1}$     |
| 1,4-dioxane               | $3.9 \times 10^7$ (70 °C)                               | $2.5 \times 10^7 \text{ M}^{-1} \text{ s}^{-1}$     |
| ethylbenzene              | $2.5 \times 10^7$ (70 °C)                               | $1.6 \times 10^7 \text{ M}^{-1} \text{ s}^{-1}$     |
| norbornene <sup>a</sup>   | $3.4 \times 10^7$ (70 °C)                               | $2.1 \times 10^7 \text{ M}^{-1} \text{ s}^{-1}$     |
| cyclooctene <sup>a</sup>  | $3.4 \times 10^7$ (70 °C)                               | $2.1 \times 10^7 \text{ M}^{-1} \text{ s}^{-1}$     |
| 1-hexadecene <sup>b</sup> | $2.0 \times 10^8$ (70 °C)                               | $1.3 \times 10^8 \text{ M}^{-1} \text{ s}^{-1}$     |
| 1-hexadecene <sup>b</sup> | $2.7 \times 10^8$ (100 °C)                              | $1.3 \times 10^8 \text{ M}^{-1} \text{ s}^{-1}$     |

<sup>a</sup> $k_t$  from styrene autoxidation at 30 °C.

<sup>b</sup> $k_t$  from 1-octene autoxidation at 30 °C.

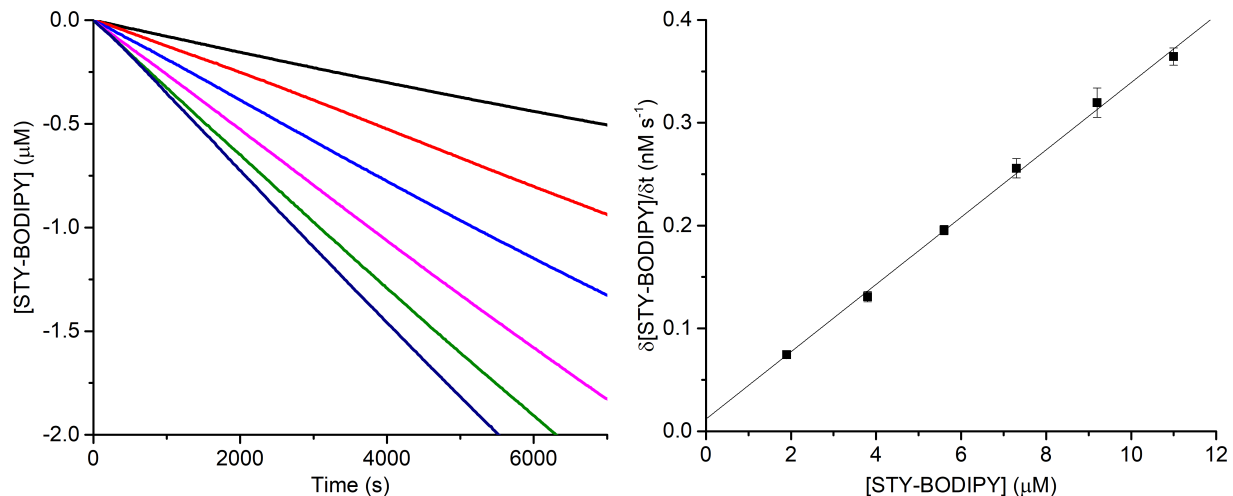

**Figure S17.** Co-oxidation of STY-BODIPY and styrene (3.5 M) in PhCl at 70 °C initiated by di-*tert*-butylperoxide (218 mM) as a function of STY-BODIPY concentration (left). Reaction progress was monitored by absorbance at 571 nm ( $\epsilon = 97\,235\text{ M}^{-1}\text{ cm}^{-1}$ ), and the observed rates were plotted as a function of STY-BODIPY concentration (right) to yield  $k_p = 4012 \pm 96\text{ M}^{-1}\text{ s}^{-1}$ .

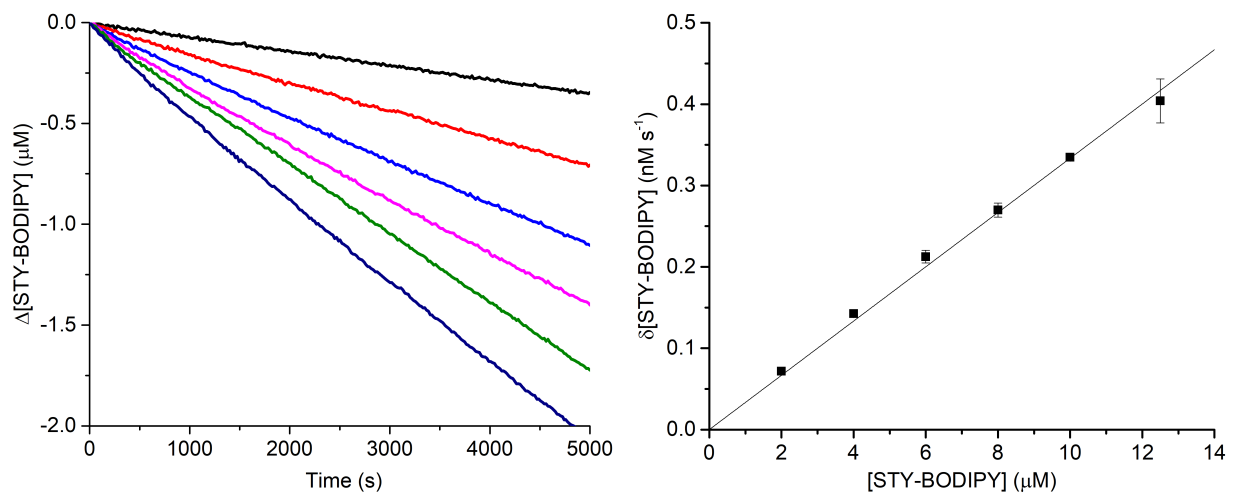

**Figure S18.** Co-oxidation of STY-BODIPY and styrene (3.5 M) in 2-octanone at 70 °C initiated by di-*tert*-butylperoxide (218 mM) as a function of STY-BODIPY concentration (left). Reaction progress was monitored by absorbance at 566 nm ( $\epsilon = 94\,876\text{ M}^{-1}\text{ cm}^{-1}$ ), and the observed rates were plotted as a function of STY-BODIPY concentration (right) to yield  $k_p = 4004 \pm 264\text{ M}^{-1}\text{ s}^{-1}$ .

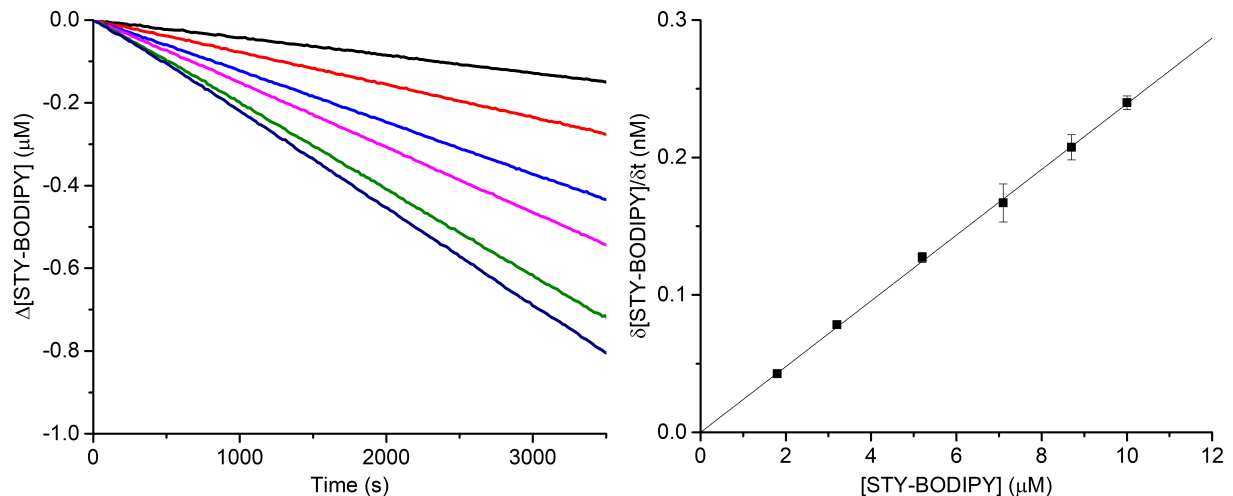

**Figure S19.** Co-oxidation of STY-BODIPY and cyclooctene (3.1 M) in PhCl at 70 °C initiated by di-*tert*-butylperoxide (218 mM) as a function of STY-BODIPY concentration (left). Reaction progress was monitored by absorbance at 568 nm ( $\epsilon = 118\,405\text{ M}^{-1}\text{cm}^{-1}$ ), and the observed rates were plotted as a function of STY-BODIPY concentration (right) to yield  $k_p = 2689 \pm 134\text{ M}^{-1}\text{ s}^{-1}$ .

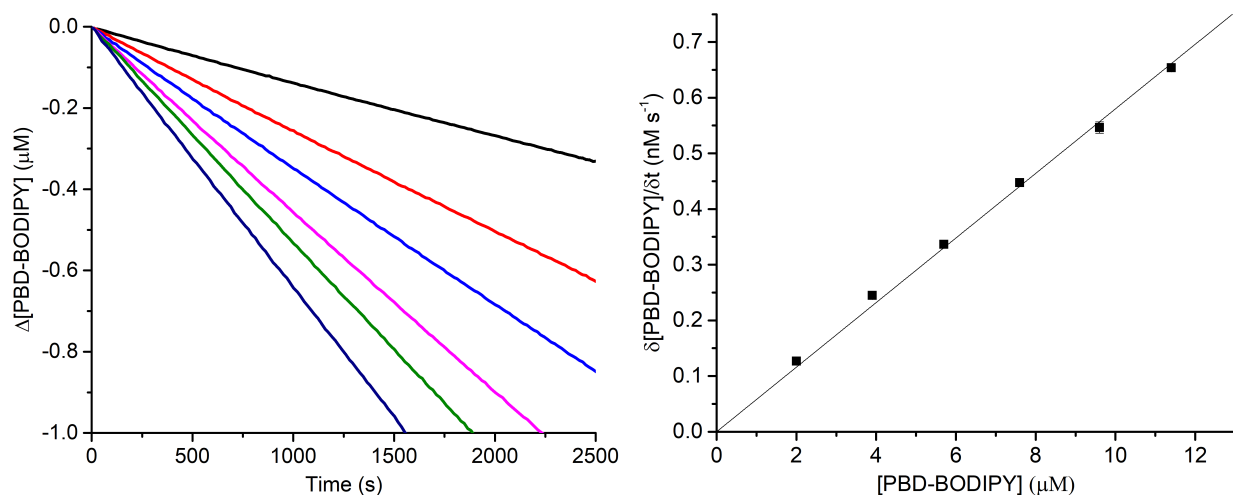

**Figure S20.** Co-oxidation of PBD-BODIPY and 1-hexadecene (2.8 M) in PhCl at 100 °C initiated by dicumylperoxide (1 mM) as a function of PBD-BODIPY concentration (left). Reaction progress was monitored by absorbance at 586 nm ( $\epsilon = 119\,166\text{ M}^{-1}\text{cm}^{-1}$ ), and the observed rates were plotted as a function of PBD-BODIPY concentration (right) to yield  $k_p = 17\,802 \pm 414\text{ M}^{-1}\text{ s}^{-1}$ .

1.

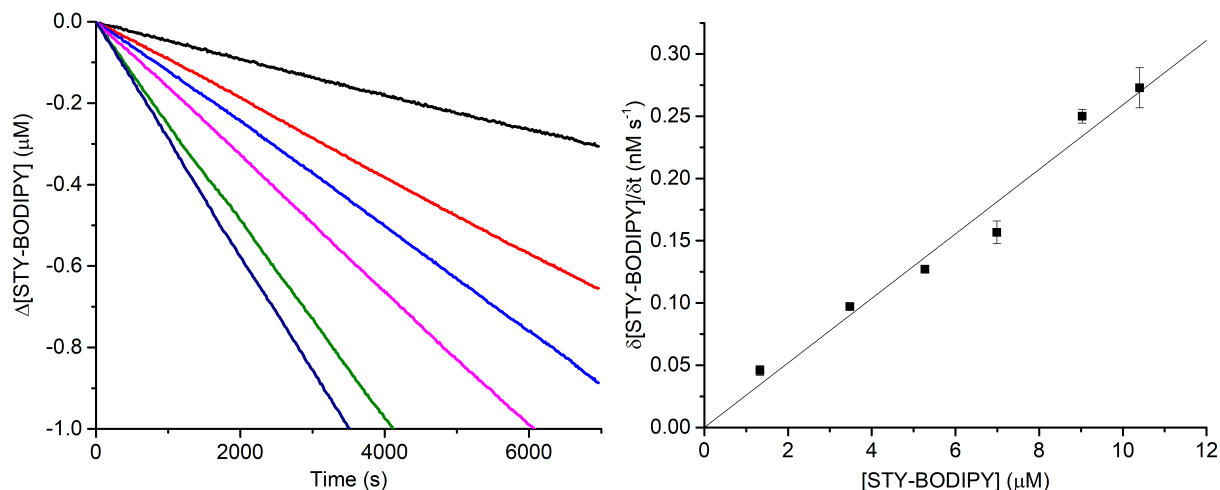

**Figure S21.** Co-oxidation of STY-BODIPY and ethylbenzene (3.3 M) in PhCl at 70 °C initiated by di-*tert*-butylperoxide (87 mM) as a function of STY-BODIPY concentration (left). Reaction progress was monitored by absorbance at 569 nm ( $\epsilon = 123\,481\text{ M}^{-1}\text{cm}^{-1}$ ), and the observed rates were plotted as a function of STY-BODIPY concentration (right) to yield  $k_p = 3402 \pm 195\text{ M}^{-1}\text{ s}^{-1}$ .

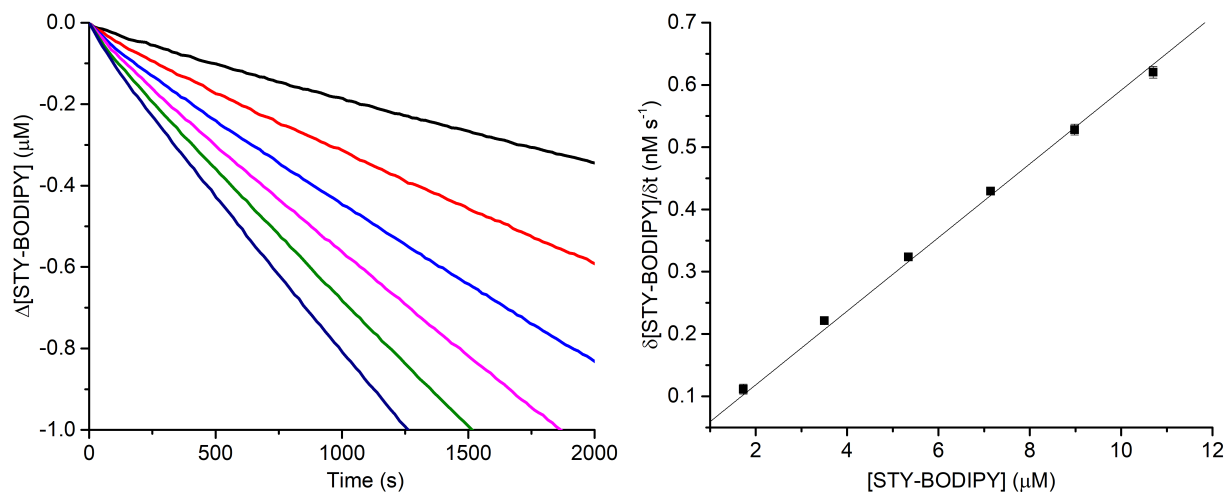

**Figure S22.** Co-oxidation of STY-BODIPY and 1,4 dioxane (2.9 M) in PhCl at 70 °C initiated by di-*tert*-butylperoxide (218 mM) as a function of STY-BODIPY concentration ( $\mu\text{M}$ ) (left). Reaction progress was monitored by absorbance at 568 nm ( $\epsilon = 113\,982\text{ M}^{-1}\text{cm}^{-1}$ ), and the observed rates were plotted as a function of STY-BODIPY concentration (right) to yield  $k_p = 6707 \pm 44\text{ M}^{-1}\text{ s}^{-1}$ .

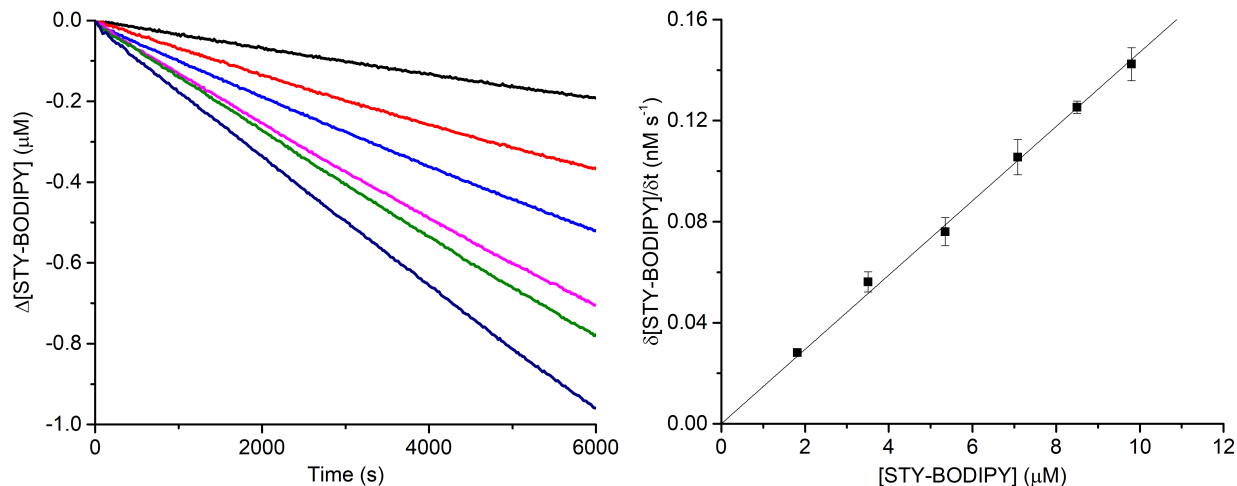

**Figure S23.** Co-oxidation of STY-BODIPY and norbornene (1.0 M) in PhCl at 70 °C initiated by di-*tert*-butylperoxide (218 mM) as a function of STY-BODIPY concentration (left). Reaction progress was monitored by absorbance at 569 nm ( $\epsilon = 122\,873\text{ M}^{-1}\text{cm}^{-1}$ ), and the observed rates were plotted as a function of STY-BODIPY concentration (right) to yield  $k_p = 1358 \pm 47\text{ M}^{-1}\text{ s}^{-1}$ .

## VII. Supplemental Data for KIE and KSE Determinations

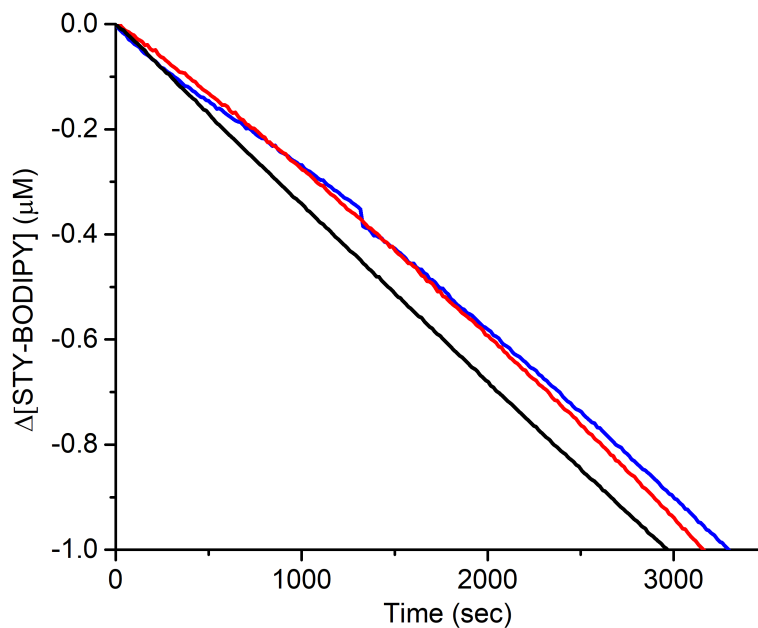

**Figure S24.** Representative co-oxidations of styrene (3.5 M) and STY-BODIPY (10  $\mu\text{M}$ ) in PhCl (black) with 1% MeOH (blue) or 1% MeOD (red) initiated with di-*tert*-butylperoxide (218 mM) at 70 °C. Reaction progress was monitored at 571 nm ( $\epsilon = 97\,235\text{ M}^{-1}\text{cm}^{-1}$ ).



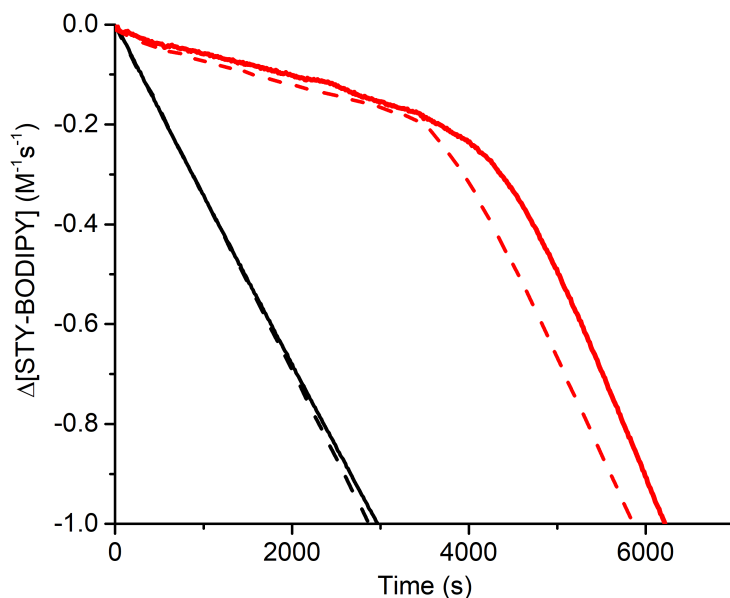

**Figure S25.** Representative co-oxidations of styrene (3.5 M) and STY-BODIPY (10  $\mu\text{M}$ ) in PhCl (solid) or 2-octanone (dashed) initiated with di-*tert*-butylperoxide (218 mM) at 70  $^{\circ}\text{C}$  (black) inhibited by TEMPO (red). Reaction progress was monitored at 571 nm ( $\epsilon = 97\,235\text{ M}^{-1}\text{ cm}^{-1}$ ) for PhCl or 566 nm ( $\epsilon = 94\,876\text{ M}^{-1}\text{ cm}^{-1}$ ) for 2-octanone.

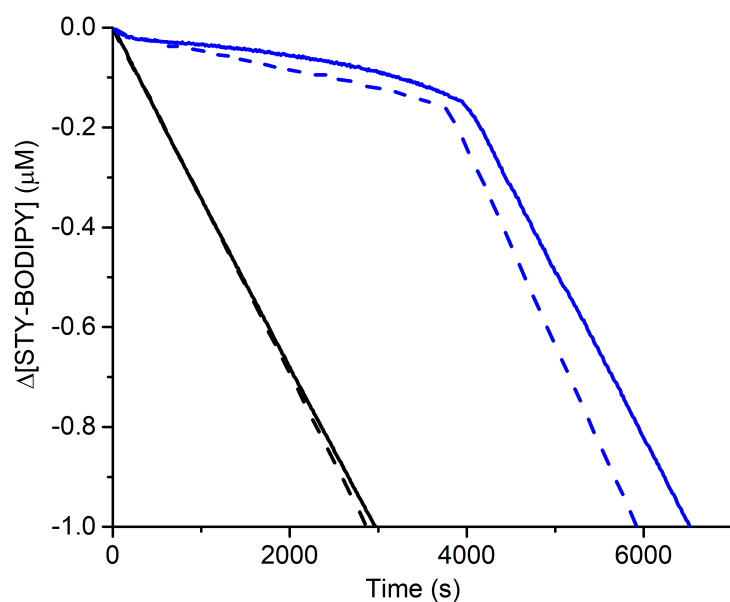

**Figure S26.** Representative reaction progress curves for the co-oxidation of styrene (3.5 M) and STY-BODIPY (10  $\mu\text{M}$ ) in PhCl (solid) or 2-octanone (dashed) initiated with di-*tert*-butylperoxide (218 mM) at 70  $^{\circ}\text{C}$  (black) inhibited by  $\text{Ar}_2\text{NO}$  (blue). Reaction progress was monitored at 571 nm ( $\epsilon = 97\,235\text{ M}^{-1}\text{ cm}^{-1}$ ) for PhCl or 566 nm ( $\epsilon = 94\,876\text{ M}^{-1}\text{ cm}^{-1}$ ) for 2-octanone.

### VIII. Monitoring of Nitroxide Formation from Diarylamine during Autoxidations

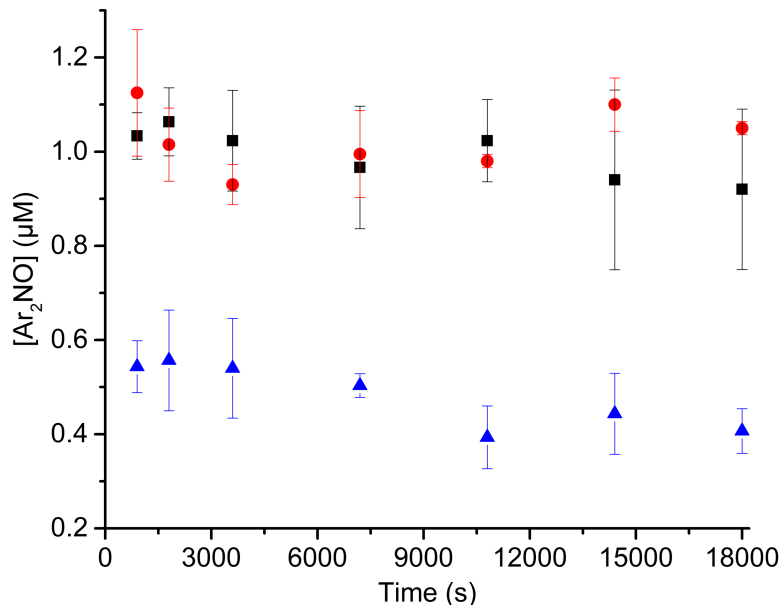

**Figure S27.** Concentration of Ar<sub>2</sub>NO determined by EPR during Ar<sub>2</sub>NH-inhibited autoxidations. Cyclooctene (3.1 M, black), norbornene (1.0 M, blue) and 1-hexadecene (2.7 M, red) in PhCl initiated with di-*tert*-butylperoxide (218 mM) at 70 °C inhibited by 2.0 µM of Ar<sub>2</sub>NH.

### IX. Autoxidations of Deuterated Cyclooctene

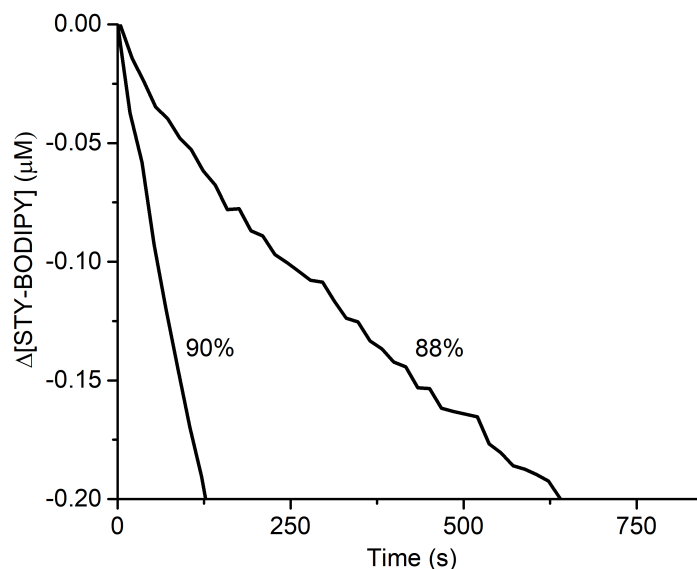

**Figure S28** Co-autoxidation of 1,2-d<sub>2</sub>-cyclooctene (88 and 90% deuterium incorporation) (3.1 M) and STY-BODIPY (10 µM) in PhCl initiated with di-*tert*-butylperoxide (218 mM) at 70 °C. Reaction progress was monitored at 568 nm ( $\epsilon = 118\,405\text{ M}^{-1}\text{ cm}^{-1}$ ).

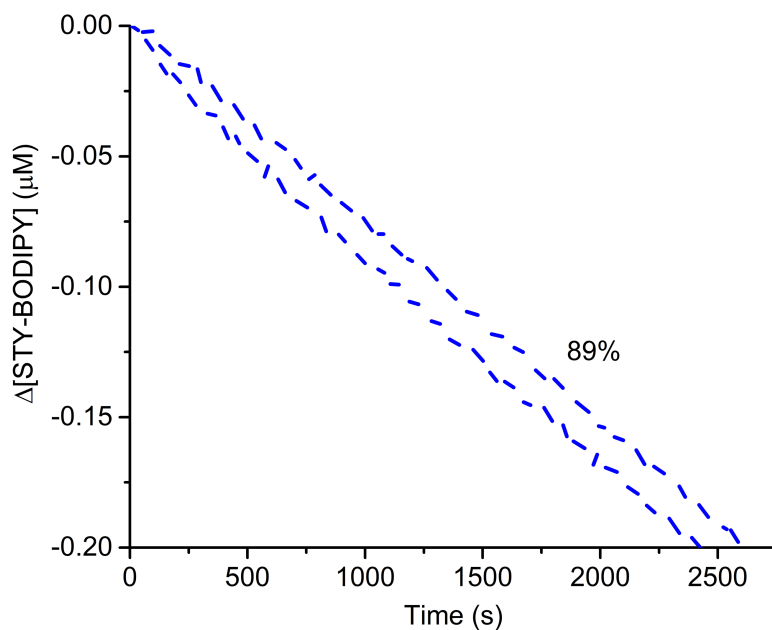

**Figure S29.** Co-oxidation of 1,2-d<sub>2</sub>-cyclooctene (89% deuterium incorporation) (3.1 M) and STY-BODIPY (10 μM) in PhCl initiated with di-*tert*-butylperoxide (218 mM) at 70 °C inhibited by DTBNH (blue dash). Reaction progress was monitored at 568 nm ( $\epsilon = 118\,405\text{ M}^{-1}\text{ cm}^{-1}$ ).

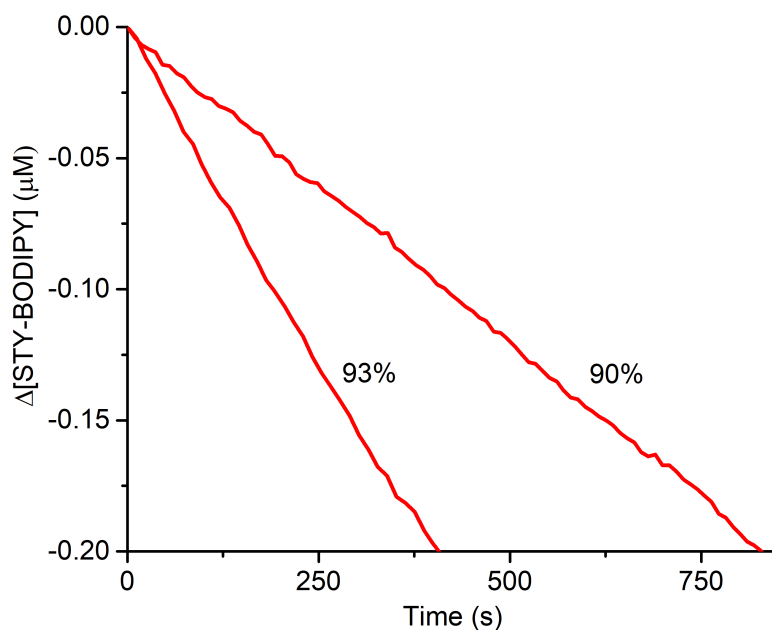

**Figure S30.** Co-oxidation of 1,2-d<sub>2</sub>-cyclooctene (90 and 93% deuterium incorporation) (3.1 M) and STY-BODIPY (10 μM) in PhCl initiated with di-*tert*-butylperoxide (218 mM) at 70 °C inhibited by TEMPO (red). Reaction progress was monitored at 568 nm ( $\epsilon = 118\,405\text{ M}^{-1}\text{ cm}^{-1}$ ).

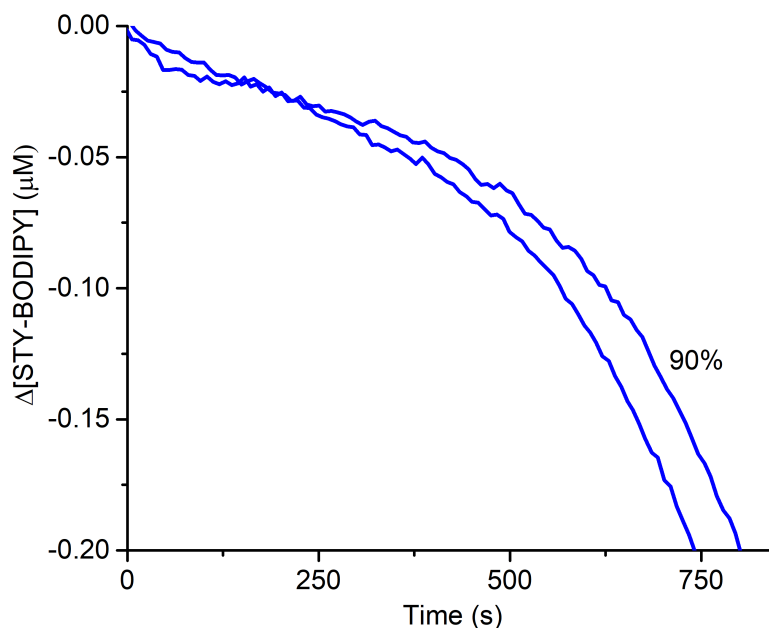

**Figure S31.** Co-oxidation of 1,2-d<sub>2</sub>-cyclooctene (90% deuterium incorporation) (3.1 M) and STY-BODIPY (10 μM) in PhCl initiated with di-*tert*-butylperoxide (218 mM) at 70 °C inhibited by Ar<sub>2</sub>NO (blue) Reaction progress was monitored by absorbance at 568 nm ( $\epsilon = 118\,405\text{ M}^{-1}\text{ cm}^{-1}$ ).

**Table S3.** Summary of inhibition rate constants ( $k_{\text{inh}}$ ) and stoichiometries ( $n$ ) derived from co-oxidations of various substrates inhibited by nitroxides and their precursors.

| RTA                                                                                                                                                                                                       | $k_{\text{inh}}\text{ (M}^{-1}\text{ s}^{-1}\text{)}$ | $n$            |
|-----------------------------------------------------------------------------------------------------------------------------------------------------------------------------------------------------------|-------------------------------------------------------|----------------|
| <b>styrene in PhCl, 37 °C, 2 μM RTA, <math>\epsilon = 139\,000\text{ M}^{-1}\text{ cm}^{-1}</math></b>                                                                                                    |                                                       |                |
| <b>AIBN (6 mM) <math>R_i = 2.8 \times 10^{-9}\text{ M s}^{-1}</math>, <math>k_t = 3.4 \times 10^7\text{ M}^{-1}\text{ s}^{-1}</math>, <math>k_p = 2720\text{ M}^{-1}\text{ s}^{-1}</math></b>             |                                                       |                |
| DTBNH                                                                                                                                                                                                     | $5.2 \pm 0.6 \times 10^5$                             | $3.1 \pm 0.1$  |
| DTBNO                                                                                                                                                                                                     | $7.3 \pm 0.7 \times 10^5$                             | $10.9 \pm 0.1$ |
| TEMPO                                                                                                                                                                                                     | $7.1 \pm 0.4 \times 10^5$                             | $10.1 \pm 0.1$ |
| <b>styrene in PhCl, 37 °C, 2 μM RTA, <math>\epsilon = 139\,000\text{ M}^{-1}\text{ cm}^{-1}</math></b>                                                                                                    |                                                       |                |
| <b>AIBN (6, 15, and 30 mM) <math>R_i = 2.6 \times 10^{-9}\text{ M s}^{-1}</math>, <math>k_t = 2.3 \times 10^7\text{ M}^{-1}\text{ s}^{-1}</math>, <math>k_p = 2720\text{ M}^{-1}\text{ s}^{-1}</math></b> |                                                       |                |
| TEMPO, AIBN 6 mM                                                                                                                                                                                          | $7.1 \pm 0.4 \times 10^5$                             | $10.1 \pm 0.1$ |
| TEMPO, AIBN 15 mM                                                                                                                                                                                         | -                                                     | $7.0 \pm 0.4$  |
| TEMPO (50 μM), AIBN 30 mM                                                                                                                                                                                 | -                                                     | $2.3 \pm 0.1$  |
| DTBNO, AIBN 6 mM                                                                                                                                                                                          | $7.3 \pm 0.7 \times 10^5$                             | $10.9 \pm 0.1$ |
| DTBNO, AIBN 15 mM                                                                                                                                                                                         | -                                                     | $9.6 \pm 0.1$  |

|                                                                                                                                                                                                                                   |                             |                |
|-----------------------------------------------------------------------------------------------------------------------------------------------------------------------------------------------------------------------------------|-----------------------------|----------------|
| DTBNO (50 $\mu$ M), AIBN 30 mM                                                                                                                                                                                                    | -                           | 6.8 $\pm$ 0.6  |
| <b>styrene in PhCl, 70 <math>^{\circ}</math>C, 2 <math>\mu</math>M RTA, <math>\epsilon = 97\,235\text{ M}^{-1}\text{ cm}^{-1}</math></b>                                                                                          |                             |                |
| <b>AIBN (0.0625, 0.125, 0.250, 0.375 and 1 mM)</b>                                                                                                                                                                                |                             |                |
| TEMPO, AIBN 62.5 $\mu$ M                                                                                                                                                                                                          | -                           | 21.9 $\pm$ 1.4 |
| TEMPO, AIBN 125 $\mu$ M                                                                                                                                                                                                           | -                           | 10.7 $\pm$ 1.1 |
| TEMPO, AIBN 250 $\mu$ M                                                                                                                                                                                                           | -                           | 9.8 $\pm$ 0.4  |
| TEMPO, AIBN 375 $\mu$ M                                                                                                                                                                                                           | -                           | 7.6 $\pm$ 1.0  |
| TEMPO (50 $\mu$ M), AIBN 1 mM                                                                                                                                                                                                     | -                           | 2.1 $\pm$ 0.1  |
| DTBNO, AIBN 62.5 $\mu$ M                                                                                                                                                                                                          | -                           | 18.3 $\pm$ 0.5 |
| DTBNO, AIBN 125 $\mu$ M                                                                                                                                                                                                           | -                           | 12.4 $\pm$ 0.7 |
| DTBNO, AIBN 250 $\mu$ M                                                                                                                                                                                                           | -                           | 10.1 $\pm$ 0.2 |
| DTBNO, AIBN 375 $\mu$ M                                                                                                                                                                                                           | -                           | 5.9 $\pm$ 0.6  |
| DTBNO (50 $\mu$ M), AIBN 1 mM                                                                                                                                                                                                     | -                           | 1.9 $\pm$ 0.2  |
| <b>styrene in PhCl, 70 <math>^{\circ}</math>C, 2 <math>\mu</math>M RTA, <math>\epsilon = 97\,235\text{ M}^{-1}\text{ cm}^{-1}</math></b>                                                                                          |                             |                |
| <b><math>^t\text{BuOO}^t\text{Bu}</math> (218 mM), <math>R_i = 4.5 \times 10^{-9}\text{ M s}^{-1}</math>, <math>k_t = 3.4 \times 10^7\text{ M}^{-1}\text{ s}^{-1}</math>, <math>k_p = 4012\text{ M}^{-1}\text{ s}^{-1}</math></b> |                             |                |
| DTBNH                                                                                                                                                                                                                             | 7.9 $\pm$ 1.0 $\times 10^5$ | 2.1 $\pm$ 0.2  |
| DTBNO                                                                                                                                                                                                                             | 7.9 $\pm$ 0.7 $\times 10^6$ | 10.6 $\pm$ 0.2 |
| DTBNOH                                                                                                                                                                                                                            | 8.5 $\pm$ 1.3 $\times 10^6$ | 11.6 $\pm$ 0.1 |
| TEMPH                                                                                                                                                                                                                             | 4.6 $\pm$ 0.5 $\times 10^5$ | 1.9 $\pm$ 0.1  |
| TEMPO                                                                                                                                                                                                                             | 2.1 $\pm$ 0.7 $\times 10^6$ | 9.3 $\pm$ 0.9  |
| TEMPOH                                                                                                                                                                                                                            | 3.0 $\pm$ 0.7 $\times 10^6$ | 10.0 $\pm$ 0.2 |
| DTBNO (MeOD)                                                                                                                                                                                                                      | 3.3 $\pm$ 1.3 $\times 10^6$ | 10.4 $\pm$ 0.5 |
| TEMPO (MeOD)                                                                                                                                                                                                                      | 1.3 $\pm$ 0.4 $\times 10^6$ | 8.9 $\pm$ 0.2  |
| DTBNO (MeOH)                                                                                                                                                                                                                      | 1.1 $\pm$ 0.3 $\times 10^7$ | 22.0 $\pm$ 1.0 |
| TEMPO (MeOH)                                                                                                                                                                                                                      | 5.5 $\pm$ 0.6 $\times 10^6$ | 26.3 $\pm$ 1.0 |
| <b>styrene in 2-octanone, 70 <math>^{\circ}</math>C, 2 <math>\mu</math>M RTA, <math>\epsilon = 94\,876\text{ M}^{-1}\text{ cm}^{-1}</math></b>                                                                                    |                             |                |
| <b><math>^t\text{BuOO}^t\text{Bu}</math> (218 mM), <math>R_i = 4.2 \times 10^{-9}\text{ M s}^{-1}</math>, <math>k_t = 3.4 \times 10^7\text{ M}^{-1}\text{ s}^{-1}</math>, <math>k_p = 4004\text{ M}^{-1}\text{ s}^{-1}</math></b> |                             |                |
| DTBNO                                                                                                                                                                                                                             | 2.8 $\pm$ 0.3 $\times 10^6$ | 8.6 $\pm$ 0.2  |
| TEMPO                                                                                                                                                                                                                             | 1.8 $\pm$ 0.5 $\times 10^6$ | 8.5 $\pm$ 0.3  |
| <b>styrene in PhCl, 70 <math>^{\circ}</math>C, 50 <math>\mu</math>M RTA, <math>\epsilon = 97\,235\text{ M}^{-1}\text{ cm}^{-1}</math></b>                                                                                         |                             |                |
| <b>1mM AIBN (1 mM), <math>R_i = 6.1 \times 10^{-8}\text{ M s}^{-1}</math>, <math>k_t = 3.4 \times 10^7\text{ M}^{-1}\text{ s}^{-1}</math>, <math>k_p = 4012\text{ M}^{-1}\text{ s}^{-1}</math></b>                                |                             |                |
| DTBNH                                                                                                                                                                                                                             | 1.2 $\pm$ 0.5 $\times 10^6$ | 0.8 $\pm$ 0.2  |
| DTBNO                                                                                                                                                                                                                             | 2.2 $\pm$ 0.3 $\times 10^5$ | 1.8 $\pm$ 0.2  |

|                                                                                                                                                                                                                            |                           |                |
|----------------------------------------------------------------------------------------------------------------------------------------------------------------------------------------------------------------------------|---------------------------|----------------|
| <b>cumene in PhCl, 68.5 °C, 50 μM RTA, <math>\epsilon = 122\,213\text{ M}^{-1}\text{ cm}^{-1}</math></b>                                                                                                                   |                           |                |
| <b>AIBN (1 mM), <math>R_i = 6.1 \times 10^{-8}\text{ M s}^{-1}</math>, <math>k_t = 1.9 \times 10^4\text{ M}^{-1}\text{ s}^{-1}</math></b>                                                                                  |                           |                |
| DTBNH                                                                                                                                                                                                                      | -                         | $2.3 \pm 0.1$  |
| DTBNO                                                                                                                                                                                                                      | -                         | $1.1 \pm 0.1$  |
| <b>norbornene in PhCl, 70 °C, 2 μM RTA, <math>\epsilon = 122\,873\text{ M}^{-1}\text{ cm}^{-1}</math></b>                                                                                                                  |                           |                |
| <b><sup>t</sup>BuOO<sup>t</sup>Bu (218 mM), <math>R_i = 7.5 \times 10^{-9}\text{ M s}^{-1}</math>, <math>k_t = 3.4 \times 10^7\text{ M}^{-1}\text{ s}^{-1}</math>, <math>k_p = 1358\text{ M}^{-1}\text{ s}^{-1}</math></b> |                           |                |
| DTBNO                                                                                                                                                                                                                      | $2.2 \pm 0.3 \times 10^6$ | $56.3 \pm 1$   |
| TEMPO                                                                                                                                                                                                                      | $1.6 \pm 0.4 \times 10^6$ | $21.8 \pm 2$   |
| <b>cyclooctene in PhCl, 70 °C, 2 μM RTA, <math>\epsilon = 118\,405\text{ M}^{-1}\text{ cm}^{-1}</math></b>                                                                                                                 |                           |                |
| <b><sup>t</sup>BuOO<sup>t</sup>Bu (218 mM), <math>R_i = 4.5 \times 10^{-9}\text{ M s}^{-1}</math>, <math>k_t = 3.4 \times 10^7\text{ M}^{-1}\text{ s}^{-1}</math>, <math>k_p = 2689\text{ M}^{-1}\text{ s}^{-1}</math></b> |                           |                |
| DTBNH                                                                                                                                                                                                                      | $2.5 \pm 0.2 \times 10^6$ | $15.8 \pm 0.2$ |
| DTBNO                                                                                                                                                                                                                      | $1.7 \pm 0.1 \times 10^7$ | $9.9 \pm 0.1$  |
| TEMPO                                                                                                                                                                                                                      | $2.6 \pm 0.2 \times 10^7$ | $8.9 \pm 0.1$  |
| <b>1-hexadecene in PhCl 100 °C, 2 μM RTA, <math>\epsilon = 119\,166\text{ M}^{-1}\text{ cm}^{-1}</math></b>                                                                                                                |                           |                |
| <b>dicumyl peroxide (1 mM), <math>R_i = 4.6 \times 10^{-9}\text{ M s}^{-1}</math>, <math>k_t = 2.6 \times 10^8\text{ M}^{-1}\text{ s}^{-1}</math>, <math>k_p = 8283\text{ M}^{-1}\text{ s}^{-1}</math>.</b>                |                           |                |
| DTBNO                                                                                                                                                                                                                      | $3.4 \pm 0.4 \times 10^6$ | $117 \pm 7$    |
| DTBNH                                                                                                                                                                                                                      | $6.2 \pm 0.4 \times 10^5$ | $23 \pm 3$     |
| TEMPO                                                                                                                                                                                                                      | $3.2 \pm 0.1 \times 10^6$ | -              |
| <b>ethylbenzene in PhCl, 70 °C, 2 μM RTA, <math>\epsilon = 123\,481\text{ M}^{-1}\text{ cm}^{-1}</math></b>                                                                                                                |                           |                |
| <b><sup>t</sup>BuOO<sup>t</sup>Bu (87 mM), <math>R_i = 3.0 \times 10^{-9}\text{ M s}^{-1}</math>, <math>k_t = 2.5 \times 10^7\text{ M}^{-1}\text{ s}^{-1}</math>, <math>k_p = 3402\text{ M}^{-1}\text{ s}^{-1}</math></b>  |                           |                |
| DTBNH                                                                                                                                                                                                                      | $4.6 \pm 0.7 \times 10^5$ | $2.3 \pm 0.1$  |
| <b>dioxane in PhCl, 70 °C, 2 μM RTA, <math>\epsilon = 113\,982\text{ M}^{-1}\text{ cm}^{-1}</math></b>                                                                                                                     |                           |                |
| <b><sup>t</sup>BuOO<sup>t</sup>Bu (218 mM), <math>R_i = 5.6 \times 10^{-9}\text{ M s}^{-1}</math>, <math>k_t = 3.9 \times 10^7\text{ M}^{-1}\text{ s}^{-1}</math>, <math>k_p = 6707\text{ M}^{-1}\text{ s}^{-1}</math></b> |                           |                |
| DTBNH                                                                                                                                                                                                                      | $3.3 \pm 0.2 \times 10^5$ | $1.8 \pm 0.1$  |

## X. Representative NMR Spectra of Deuterated Cyclooctene

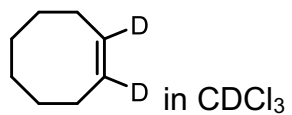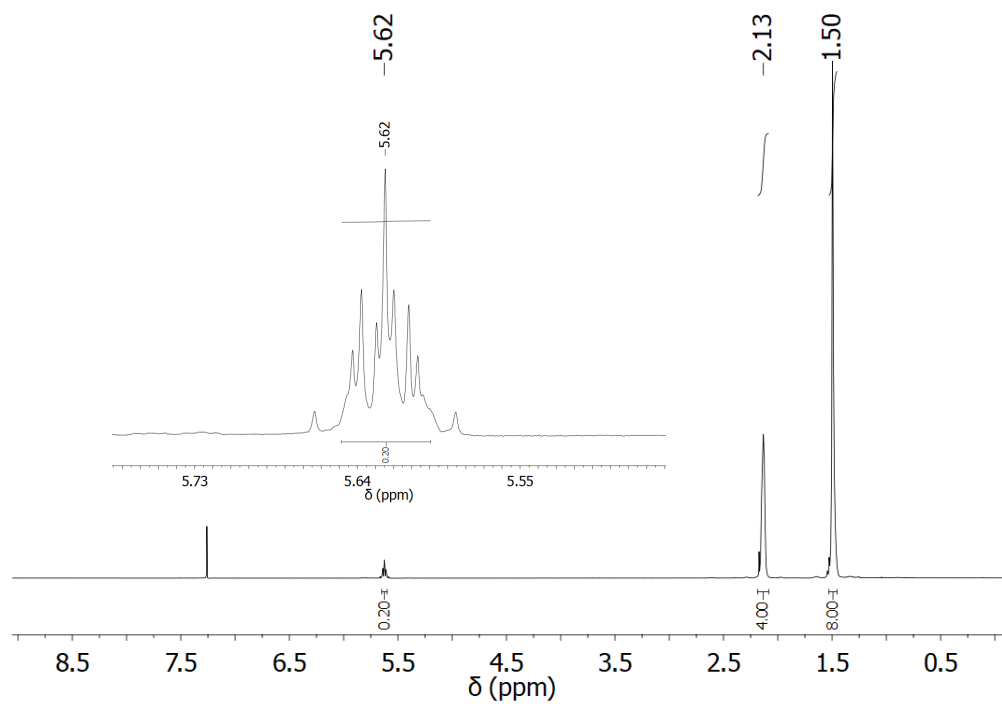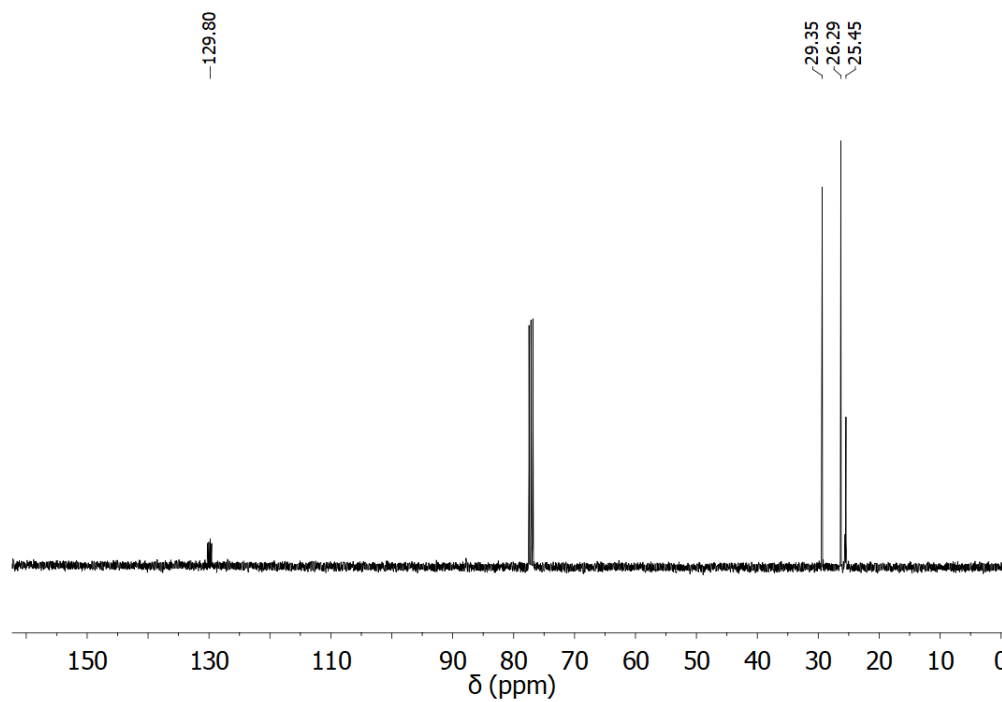

## **XI. Computational Data**

Calculations were generally performed using the CBS-QB3<sup>15</sup> complete basis set method as implemented in the Gaussian 16 software.<sup>16</sup> Rate constants were calculated via transition state theory at 70 °C. The intramolecular hydrogen abstraction step was also calculated using small curvature tunneling corrections.<sup>17</sup> In addition to this proven methodology we also explored the calculation scheme previously employed by Coote and coworkers<sup>18</sup> to explore the termination reactions of peroxy radicals to test if it would be appropriate and accurate enough for our calculations. As the transition states in autoxidation are radical reactions (also including dioxygen) they can suffer from spin contamination when employing unrestricted DFT as does the CBS-QB3 methodology.

In short (see complete details in ref 4) this entails optimizing the geometry with the meta-hybrid functional M11 using the 6-31+G(d,p) basis set, then performing a CCSD(T)/cc-pVDZ energy calculation. The results from these calculations were not satisfactory (e.g. ~7 kcal mol<sup>-1</sup> higher barrier for H-abstraction of 1,4-cyclohexadiene in contrast to CBS-QB3, which matches well to experiment). Therefore, we also employed the spin correction methodology published by Yamaguchi.<sup>19</sup>

$${}^2E_{AP} = {}^2E_{LS} + \frac{\langle \hat{S}^2 \rangle_{LS} - 0.75}{\langle \hat{S}^2 \rangle_{HS} - \langle \hat{S}^2 \rangle_{LS}} ({}^2E_{LS} - {}^4E_{HS})$$

The results from these calculations are summarized in Table S3 and plotted against the CBS-QB3 results in Figure S7. What can be seen is that the CCSD(T) energies don't accurately reproduce the thermodynamics of the initial H-abstraction reaction of 1,4-CHD. In addition we employed a larger basis set CCSD(T)/cc-pVTZ//M11/cc-pVTZ but also were not satisfied with the results. We therefore employed CBS-QB3 for all results of this study.



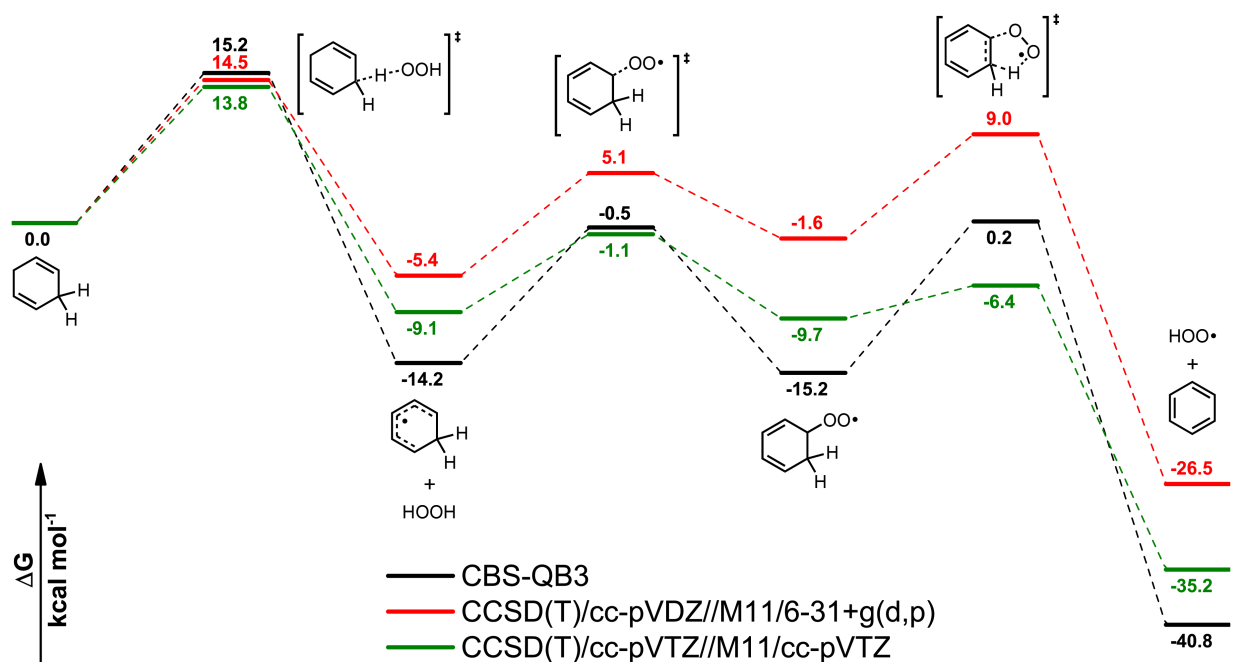

**Figure S32.** Computed free energy profile for the propagation steps of 1,4-cyclohexadiene autoxidation, compared for three different methodologies.

**Table S4.** Data for the CCSD(T)/cc-pVDZ//M11/6-31+G(d,p) test calculations.  $E_{HS}$ ,  $E_{LS}$ ,  $E_{AP}$  ... high-spin, low-spin and spin projected CCSD(T) energies,  $\langle S^2 \rangle$  ... spin squared operator of the corresponding CCSD(T) calculations,  $G_{corr}$  ... free energy correction at the M11 level of theory.

| Molecule                | $E_{HS}$    | $E_{LS}$    | $E_{AP}$    | $\langle S^2 \rangle_{HS}$ | $\langle S^2 \rangle_{LS}$ | $G_{corr}$ | <b>G</b>           |
|-------------------------|-------------|-------------|-------------|----------------------------|----------------------------|------------|--------------------|
| O <sub>2s</sub>         | -149,985293 | -149,969766 | -149,953128 | 2,0042                     | 1,0367                     | -0,014915  | <b>-149,968043</b> |
| O <sub>2t</sub>         |             |             | -149,985293 |                            | 2,0042                     | -0,015937  | <b>-150,00123</b>  |
| 1,4-cyclohexadiene      |             |             | -232,746167 |                            | -                          | 0,093516   | <b>-232,652651</b> |
| HOO*                    |             |             | -150,557989 |                            | 0,7512                     | -0,007563  | <b>-150,565552</b> |
| HOOH                    |             |             | -151,192886 |                            | -                          | 0,004839   | <b>-151,188047</b> |
| 1,4-cyc-HOO TS          | -383,107567 | -383,282809 | -383,295714 | 3,8417                     | 0,96206                    | 0,10065    | <b>-383,195064</b> |
| cyclohexadiene-rad      |             |             | -232,118527 |                            | 1,0638                     | 0,079841   | <b>-232,038686</b> |
| cyc + O <sub>2</sub> TS | -382,063422 | -382,091564 | -382,106324 | 4,0949                     | 1,9008                     | 0,083019   | <b>-382,023305</b> |
| cyc-OO*                 |             |             | -382,120622 |                            | 0,75176                    | 0,086718   | <b>-382,033904</b> |
| cyc-OO*-H TS            | -381,998361 | -382,097477 | -382,099835 | 3,9862                     | 0,82522                    | 0,082813   | <b>-382,017022</b> |
| PhH                     |             |             | -231,581139 |                            | -                          | 0,073063   | <b>-231,508076</b> |

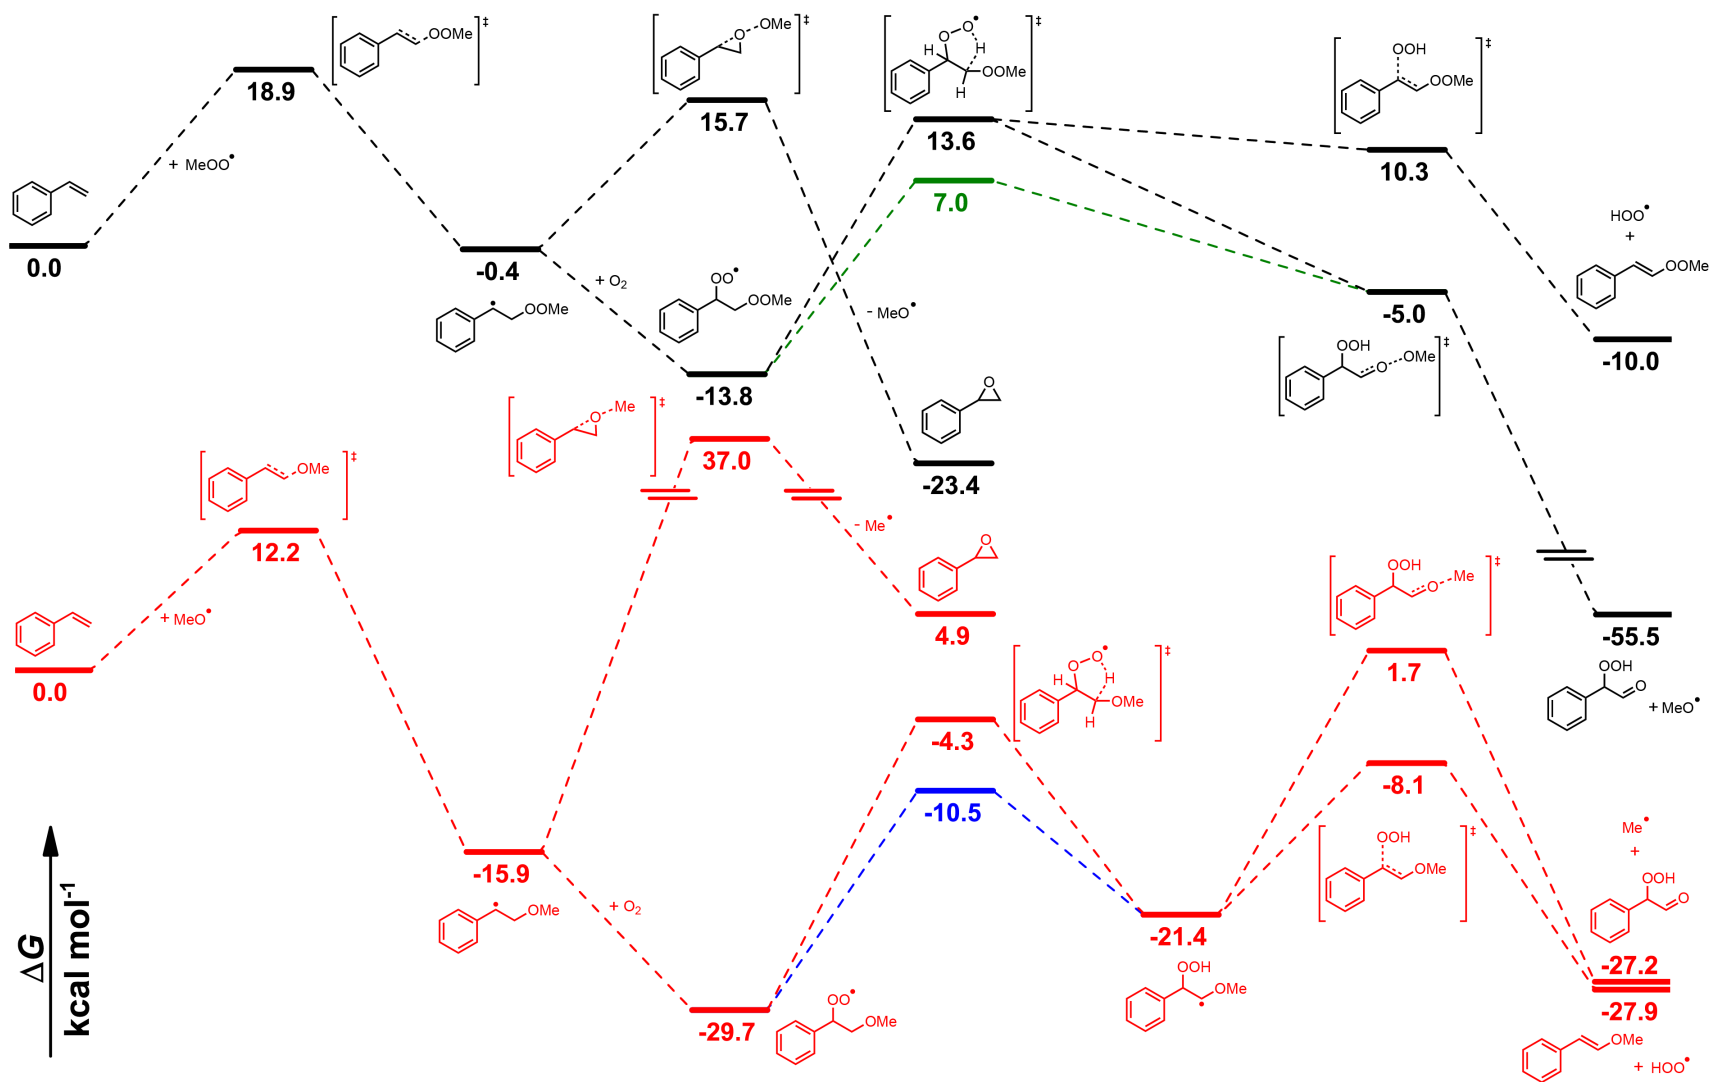

**Figure S33.** Computed free energy profile for the propagation steps of styrene autoxidation, including pathways to  $\text{HOO}^\bullet$  formation. The differently colored energies were derived employing tunneling corrections.

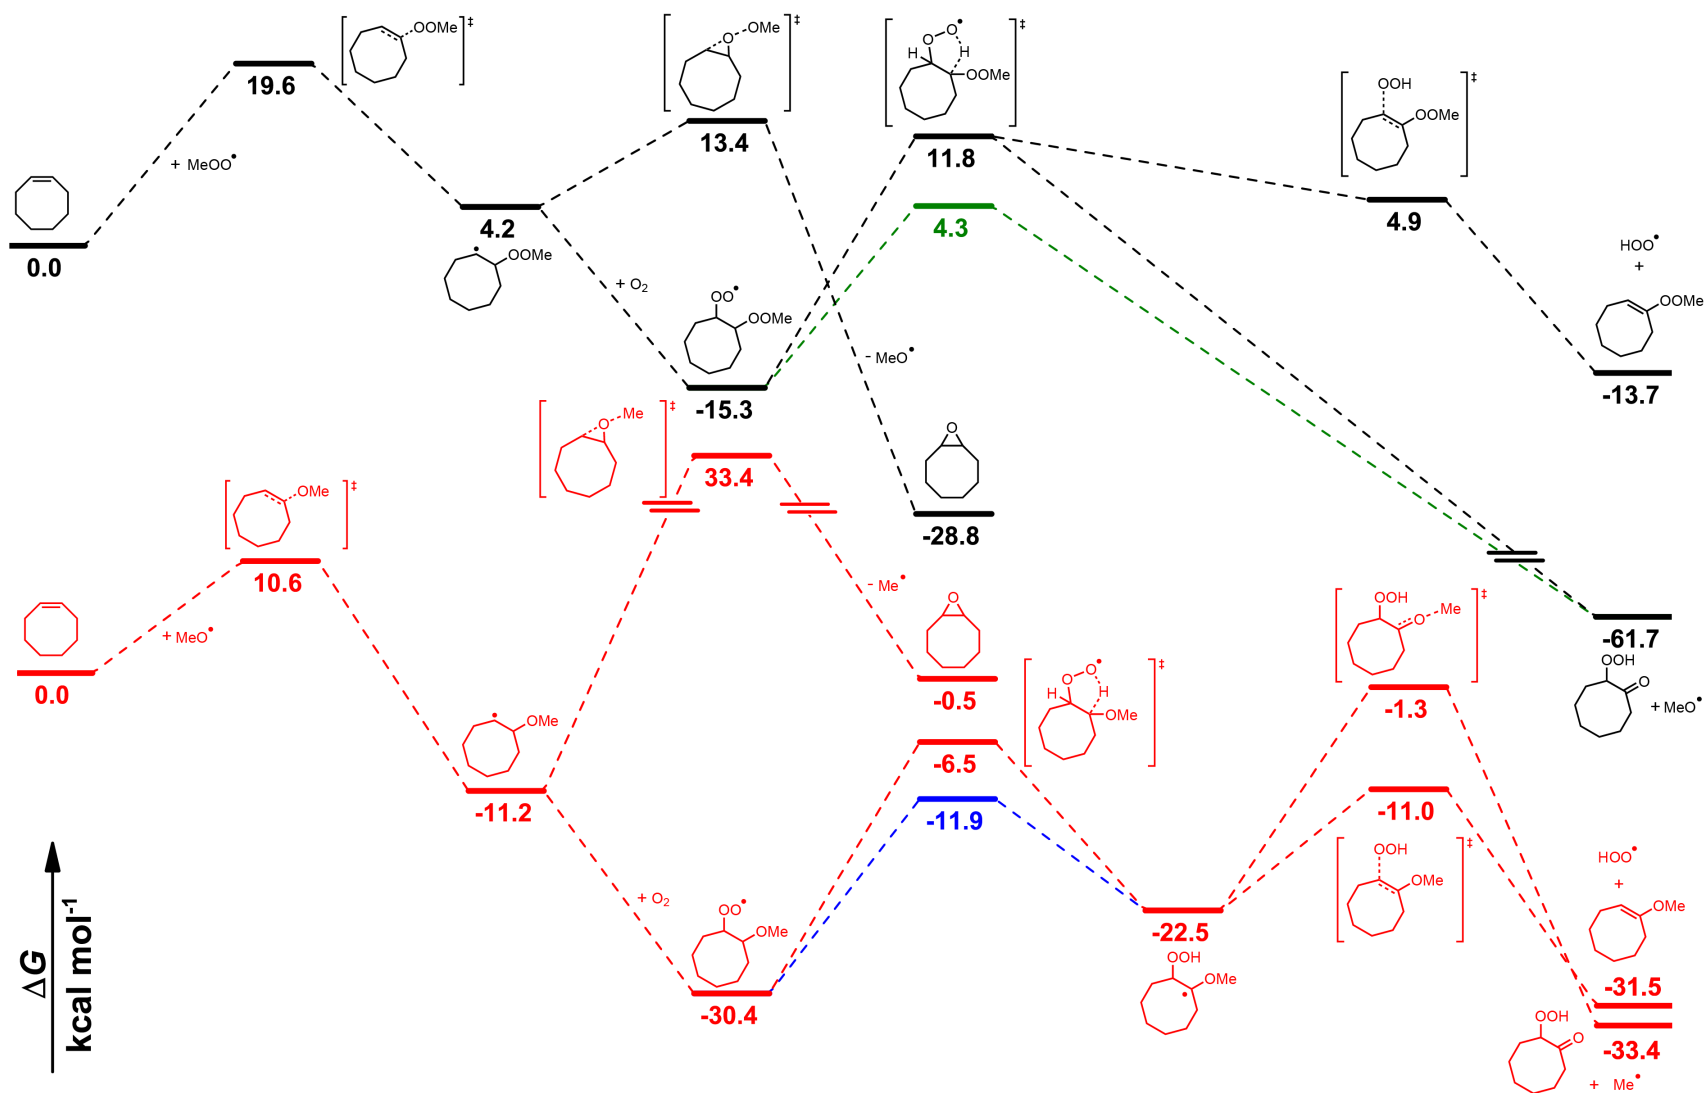

**Figure S34.** Computed free energy profile for the propagation steps of cyclooctene autoxidation, including pathways to  $\text{HOO}^\bullet$  formation. The differently colored energies were derived employing tunneling corrections.

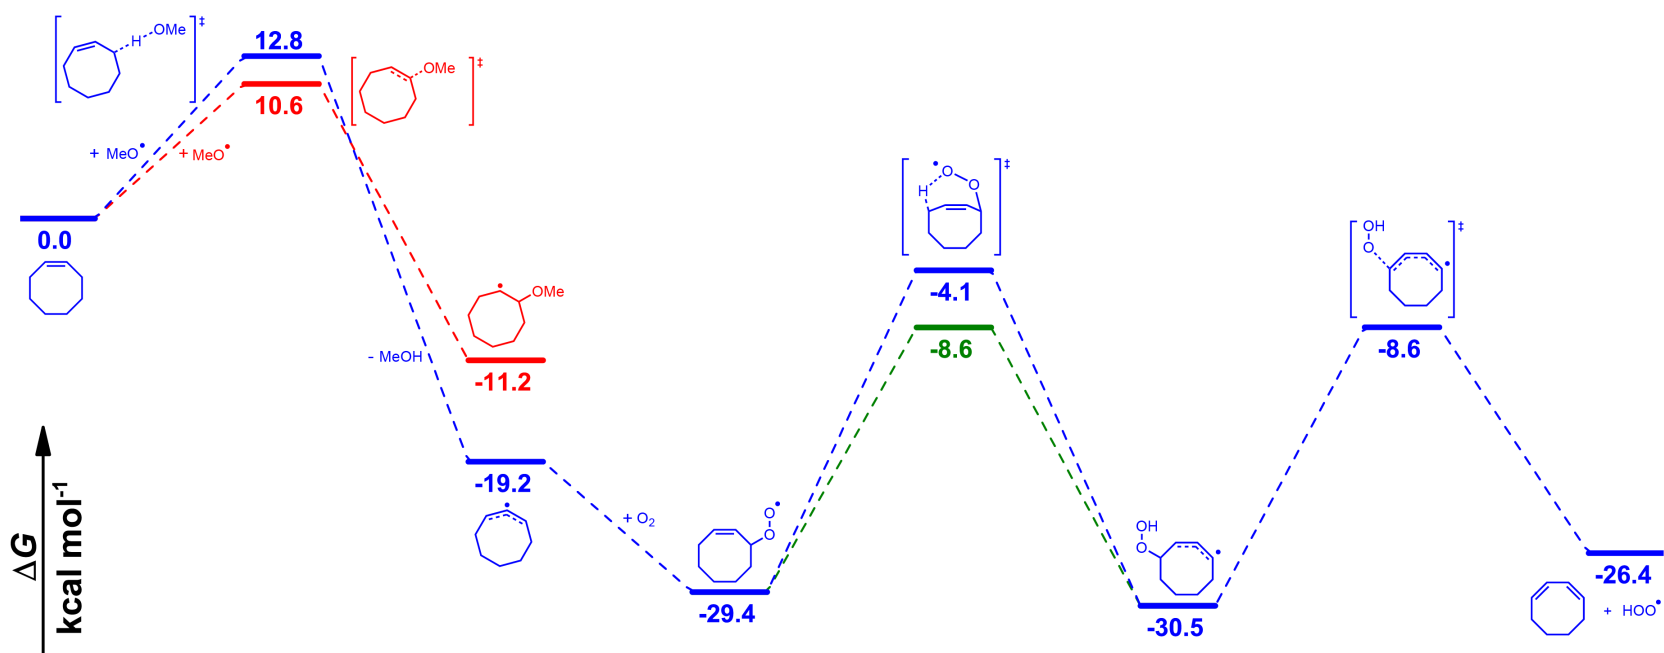

**Figure S35.** Computed free energy profile for the reactions of an alkoxy radical (MeO•) with cyclooctene, comparing addition vs. hydrogen abstraction and the possible follow-up reactions leading to the formation of HOO•. The differently colored energies were derived employing tunneling corrections.

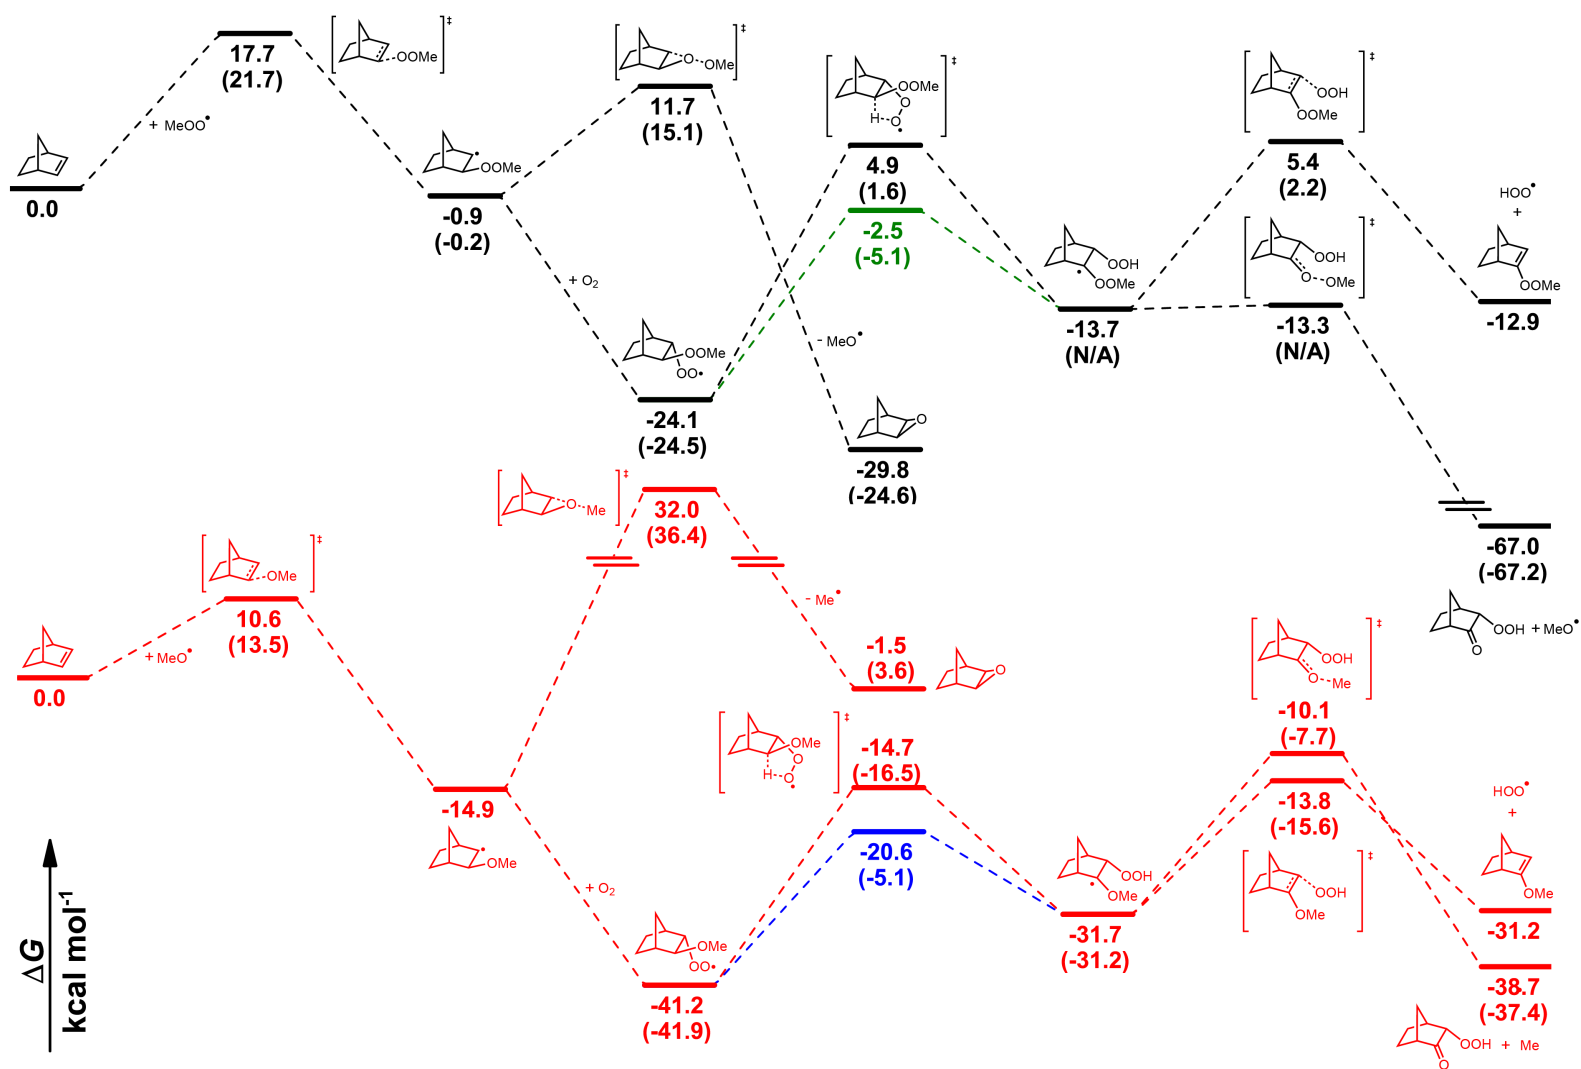

**Figure S36.** Computed free energy profile for the propagation steps of norbornene autoxidation, including pathways to HOO• formation (values in parentheses denote the endo-pathway). The differently colored energies were derived employing tunneling corrections.<sup>7</sup>

## Optimized Gaussian Structures and CBS-QB3 Energies

hydroperoxyl radical

HOO•

CBS-QB3 Enthalpy= -150.737287 CBS-QB3 Free Energy= -150.763268

|     |             |             |            |
|-----|-------------|-------------|------------|
| 0 2 |             |             |            |
| O   | 0.05528600  | 0.71849700  | 0.00000000 |
| O   | 0.05528600  | -0.60965600 | 0.00000000 |
| H   | -0.88456800 | -0.87073000 | 0.00000000 |

hydrogen peroxide

HOOH

CBS-QB3 Enthalpy= -151.374582 CBS-QB3 Free Energy= -151.401132

|     |             |             |             |
|-----|-------------|-------------|-------------|
| 0 1 |             |             |             |
| O   | -0.71709500 | -0.11848600 | -0.05265700 |
| O   | 0.71709500  | 0.11848500  | -0.05266200 |
| H   | 1.01852700  | -0.66735700 | 0.42128100  |
| H   | -1.01852600 | 0.66736400  | 0.42127400  |

1,4-Cyclohexadiene

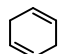

CBS-QB3 Enthalpy= -232.933952 CBS-QB3 Free Energy= -232.968094

|     |             |             |             |
|-----|-------------|-------------|-------------|
| 0 1 |             |             |             |
| C   | 0.00000000  | 1.49719200  | 0.00000000  |
| C   | -1.25442600 | 0.66544900  | 0.00000000  |
| C   | -1.25442600 | -0.66544900 | 0.00000000  |
| C   | 0.00000000  | -1.49719200 | 0.00000000  |
| C   | 1.25442600  | -0.66544900 | 0.00000000  |
| C   | 1.25442600  | 0.66544900  | 0.00000000  |
| H   | 0.00000000  | 2.17161600  | -0.86941800 |
| H   | -2.19913400 | 1.20251500  | 0.00000000  |
| H   | -2.19913400 | -1.20251500 | 0.00000000  |
| H   | 0.00000000  | -2.17161500 | 0.86941900  |
| H   | 2.19913400  | -1.20251500 | 0.00000000  |
| H   | 2.19913400  | 1.20251500  | 0.00000000  |
| H   | 0.00000000  | -2.17161600 | -0.86941800 |
| H   | 0.00000000  | 2.17161500  | 0.86941900  |

1,4-Cyclohexadiene H-abstraction by HOO• TS

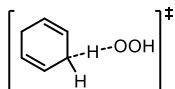

TS freq.: -1459.46 cm<sup>-1</sup>

CBS-QB3 Enthalpy= -383.662631 CBS-QB3 Free Energy= -383.707083

|     |             |             |             |
|-----|-------------|-------------|-------------|
| 0 2 |             |             |             |
| C   | -0.14490000 | 0.66577200  | 1.10091600  |
| C   | 0.32028000  | -0.72323300 | 1.24567100  |
| C   | 1.17507300  | -1.28624100 | 0.37784800  |
| C   | 1.78599900  | -0.52827600 | -0.76609300 |
| C   | 1.45957800  | 0.93751900  | -0.74793300 |
| C   | 0.59553100  | 1.47818800  | 0.12321900  |
| H   | -1.30123800 | 0.54752100  | 0.61474900  |
| H   | -0.08442800 | -1.31002500 | 2.06485200  |
| H   | 1.47052900  | -2.32395100 | 0.50198200  |
| H   | 2.87713400  | -0.67118100 | -0.76682900 |
| H   | 1.96107400  | 1.56650200  | -1.47688400 |
| H   | 0.38988000  | 2.54323500  | 0.09146300  |

|   |             |             |             |
|---|-------------|-------------|-------------|
| H | 1.45598700  | -0.96685900 | -1.72134300 |
| H | -0.38421300 | 1.17206400  | 2.03914800  |
| O | -2.42522100 | 0.23203200  | 0.00525100  |
| O | -2.01230300 | -0.52987100 | -1.08142100 |
| H | -2.03390100 | -1.43696800 | -0.73955200 |

### Cyclohexadienyl radical

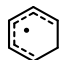

CBS-QB3 Enthalpy= -232.318036 CBS-QB3 Free Energy= -232.352889

|     |             |             |             |
|-----|-------------|-------------|-------------|
| 0 2 |             |             |             |
| C   | -1.45347900 | 0.00000200  | -0.00000200 |
| C   | -0.73966900 | -1.22463600 | -0.00000200 |
| C   | 0.62292600  | -1.25504200 | 0.00000000  |
| C   | 1.44668200  | -0.00000300 | 0.00000300  |
| C   | 0.62293000  | 1.25504100  | 0.00000200  |
| C   | -0.73966500 | 1.22463800  | 0.00000000  |
| H   | -2.53628600 | 0.00000400  | -0.00000400 |
| H   | -1.29425200 | -2.15779000 | -0.00000400 |
| H   | 1.14925500  | -2.20375500 | -0.00000100 |
| H   | 2.13395200  | -0.00000500 | 0.86546100  |
| H   | 1.14926300  | 2.20375100  | 0.00000300  |
| H   | -1.29424400 | 2.15779400  | 0.00000000  |
| H   | 2.13395700  | -0.00000300 | -0.86545200 |

### Cyclohexadienyl radical oxygen addition TS

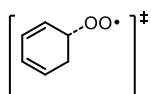

TS freq.: -319.26 cm<sup>-1</sup>

CBS-QB3 Enthalpy= -382.474649 CBS-QB3 Free Energy= -382.515477

|     |             |             |             |
|-----|-------------|-------------|-------------|
| 0 2 |             |             |             |
| C   | 1.48130800  | -0.72915500 | -0.63494300 |
| C   | 0.71504100  | -1.39893300 | 0.39098100  |
| C   | -0.06576200 | -0.69225500 | 1.26866600  |
| C   | -0.29076600 | 0.67462000  | 1.03843300  |
| C   | 0.64925900  | 1.46425000  | 0.17747000  |
| C   | 1.47391800  | 0.61263100  | -0.73947800 |
| H   | -0.64458700 | -1.21023500 | 2.02413400  |
| H   | 0.79471900  | -2.47612400 | 0.48108800  |
| H   | 2.07892100  | -1.32860500 | -1.31247600 |
| H   | -0.91553600 | 1.23551300  | 1.72324600  |
| H   | 0.08199200  | 2.20956200  | -0.39596000 |
| H   | 1.32055200  | 2.06270600  | 0.81989200  |
| H   | 2.08358100  | 1.11389700  | -1.48363200 |
| O   | -1.78753700 | 0.48005900  | -0.39464600 |
| O   | -1.78466600 | -0.62926800 | -0.96323600 |

### 2,4-cyclohexadiene peroxy radical

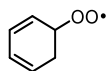

CBS-QB3 Enthalpy= -382.498575 CBS-QB3 Free Energy= -382.539013

|     |             |             |             |
|-----|-------------|-------------|-------------|
| 0 2 |             |             |             |
| C   | -1.65124700 | -1.01957700 | -0.15799300 |
| C   | -0.48646200 | -1.36953100 | 0.40844500  |
| C   | 0.58147600  | -0.34441800 | 0.61945600  |
| C   | 0.06160700  | 1.08574400  | 0.72531300  |
| C   | -1.14505500 | 1.35987700  | -0.12666800 |
| C   | -1.94634200 | 0.36368600  | -0.52585700 |
| H   | -2.40373900 | -1.77552800 | -0.35805200 |
| H   | -0.26419400 | -2.40129600 | 0.65281200  |
| H   | 1.23403300  | -0.58009600 | 1.46042800  |

|   |             |             |             |
|---|-------------|-------------|-------------|
| H | -0.19942300 | 1.27890900  | 1.77633900  |
| H | -1.37483300 | 2.39174900  | -0.36951400 |
| H | -2.83738700 | 0.56657700  | -1.10911700 |
| H | 0.88892600  | 1.76318000  | 0.49547700  |
| O | 1.48520200  | -0.46609800 | -0.58238800 |
| O | 2.57389100  | 0.25382600  | -0.44318100 |

Cyclohexadiene peroxy radical internal H-abstraction TS

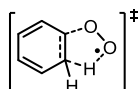

TS freq.: -306.78 cm<sup>-1</sup>

CBS-QB3 Enthalpy= -382.473236 CBS-QB3 Free Energy= -382.514510

|   |             |             |             |
|---|-------------|-------------|-------------|
| 0 | 2           |             |             |
| C | 0.69500500  | 1.40801600  | 0.29667400  |
| C | -0.19828500 | 0.55816400  | 0.95347000  |
| C | -0.08337100 | -0.89520800 | 0.81214100  |
| C | 1.09556600  | -1.37809800 | 0.07534600  |
| C | 1.92136900  | -0.51627100 | -0.57579700 |
| C | 1.71812300  | 0.89029900  | -0.47631600 |
| H | 0.58796800  | 2.48110100  | 0.40572200  |
| H | 1.26274800  | -2.44838700 | 0.02234600  |
| H | 2.75891700  | -0.89118700 | -1.15320500 |
| H | 2.39953100  | 1.56107400  | -0.98723800 |
| H | -1.02506700 | -1.16696400 | 0.16714200  |
| H | -0.89859400 | 0.96208700  | 1.67091400  |
| O | -2.12725300 | 0.64299100  | -0.42000000 |
| O | -2.33256000 | -0.57345700 | -0.62590700 |
| H | -0.29744300 | -1.45541100 | 1.72847600  |

benzene

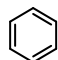

CBS-QB3 Enthalpy= -231.784315 CBS-QB3 Free Energy= -231.816512

|   |             |             |            |
|---|-------------|-------------|------------|
| 0 | 1           |             |            |
| C | 1.20717800  | 0.69696300  | 0.00000000 |
| C | 0.00000000  | 1.39392600  | 0.00000000 |
| C | -1.20717800 | 0.69696400  | 0.00000000 |
| C | -1.20717800 | -0.69696300 | 0.00000000 |
| C | 0.00000000  | -1.39392600 | 0.00000000 |
| C | 1.20717800  | -0.69696400 | 0.00000000 |
| H | 2.14631300  | 1.23917900  | 0.00000000 |
| H | 0.00000200  | 2.47834800  | 0.00000000 |
| H | -2.14631400 | 1.23917700  | 0.00000000 |
| H | -2.14631300 | -1.23917900 | 0.00000000 |
| H | -0.00000200 | -2.47834800 | 0.00000000 |
| H | 2.14631400  | -1.23917700 | 0.00000000 |

methylperoxy radical

MeOO•

CBS-QB3 Enthalpy= -189.954731 CBS-QB3 Free Energy= -189.985244

|   |             |             |             |
|---|-------------|-------------|-------------|
| 0 | 2           |             |             |
| C | 1.09605800  | -0.18318200 | 0.00000000  |
| H | 1.87467600  | 0.57860400  | 0.00000800  |
| H | 1.14883700  | -0.80072600 | 0.89698200  |
| H | 1.14884100  | -0.80070700 | -0.89699400 |
| O | -0.15733600 | 0.54388500  | 0.00000000  |
| O | -1.18625200 | -0.27864500 | 0.00000000  |

methylperoxy radical

MeO•



CBS-QB3 Enthalpy= -114.870535 CBS-QB3 Free Energy= -114.897461

|     |             |             |             |
|-----|-------------|-------------|-------------|
| 0 2 |             |             |             |
| C   | 0.57342800  | 0.00000000  | -0.01405500 |
| H   | 0.87136300  | -0.00000900 | 1.05454200  |
| H   | 1.01145200  | -0.90926600 | -0.45439500 |
| H   | 1.01145300  | 0.90927300  | -0.45438000 |
| O   | -0.79185400 | 0.00000000  | -0.00768000 |

methanol

MeOH

CBS-QB3 Enthalpy= -115.535676 CBS-QB3 Free Energy= -115.562684

|     |             |             |             |
|-----|-------------|-------------|-------------|
| 0 1 |             |             |             |
| C   | 0.66364400  | -0.01953800 | 0.00000300  |
| H   | 1.03509400  | -0.54226400 | -0.89204900 |
| H   | 1.08287900  | 0.98757500  | -0.00006000 |
| H   | 1.03506100  | -0.54218200 | 0.89210600  |
| O   | -0.75012600 | 0.12170000  | 0.00000100  |
| H   | -1.13388600 | -0.75949700 | -0.00002200 |

methyl radical

Me•

CBS-QB3 Enthalpy= -39.740781 CBS-QB3 Free Energy= -39.764594

|     |             |             |             |
|-----|-------------|-------------|-------------|
| 0 2 |             |             |             |
| C   | 0.00000000  | 0.00000000  | 0.00000100  |
| H   | 1.06406300  | -0.18749600 | -0.00000200 |
| H   | -0.69441000 | -0.82775500 | -0.00000200 |
| H   | -0.36965500 | 1.01525200  | -0.00000200 |

styrene

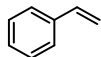

CBS-QB3 Enthalpy= -309.031150 CBS-QB3 Free Energy= -309.070748

|     |             |             |             |
|-----|-------------|-------------|-------------|
| 0 1 |             |             |             |
| C   | -2.26145200 | 0.26094500  | 0.00000300  |
| C   | -1.77806700 | -1.04426700 | 0.00000400  |
| C   | -0.40595000 | -1.27907500 | 0.00000000  |
| C   | 0.51410300  | -0.22010400 | -0.00000400 |
| C   | 0.00842700  | 1.09057500  | -0.00000600 |
| C   | -1.35997100 | 1.32683700  | -0.00000200 |
| H   | -3.32903500 | 0.44930000  | 0.00000600  |
| H   | -2.46812300 | -1.88067600 | 0.00000800  |
| H   | -0.03554400 | -2.29920300 | 0.00000100  |
| H   | 0.69062700  | 1.93261800  | -0.00001100 |
| H   | -1.72838500 | 2.34679900  | -0.00000400 |
| C   | 1.95326600  | -0.52815100 | -0.00000700 |
| C   | 2.97226800  | 0.33471600  | 0.00000900  |
| H   | 2.18562200  | -1.59100200 | -0.00002200 |
| H   | 3.99695400  | -0.01657700 | 0.00000500  |
| H   | 2.83214100  | 1.40988200  | 0.00002700  |

styrene – methylperoxyl radical addition TS

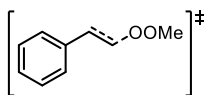

TS freq.: -487.83 cm<sup>-1</sup>

CBS-QB3 Enthalpy= -498.975261 CBS-QB3 Free Energy= -499.025836

0 2

|   |             |             |             |
|---|-------------|-------------|-------------|
| C | 1.61053100  | 1.53084300  | -0.74650800 |
| H | 1.55286600  | 1.05284700  | -1.71506800 |
| H | 2.35729600  | 2.30937300  | -0.66046500 |
| C | 0.51691800  | 1.56033400  | 0.09494000  |
| H | 0.55758100  | 2.22590000  | 0.95255800  |
| C | -0.66908900 | 0.73696200  | -0.01219000 |
| C | -1.74301400 | 0.95606700  | 0.87697300  |
| C | -0.80962200 | -0.28936300 | -0.97212100 |
| C | -2.90499200 | 0.20057300  | 0.80321600  |
| H | -1.65296400 | 1.73597700  | 1.62610800  |
| C | -1.97171100 | -1.04495100 | -1.03910600 |
| H | 0.00756900  | -0.50841000 | -1.64734600 |
| C | -3.02714100 | -0.80419300 | -0.15715100 |
| H | -3.71770400 | 0.39230600  | 1.49494000  |
| H | -2.05683800 | -1.83077300 | -1.78150300 |
| H | -3.93306500 | -1.39651600 | -0.21571200 |
| O | 2.89375200  | 0.23096900  | -0.05911700 |
| O | 2.39838300  | -1.04814600 | -0.19182700 |
| C | 2.08624400  | -1.56582700 | 1.10447200  |
| H | 1.75992900  | -2.59357800 | 0.93540500  |
| H | 2.97551100  | -1.54849400 | 1.73914400  |
| H | 1.28398700  | -0.98388400 | 1.56433700  |

styrene – methylperoxyl adduct

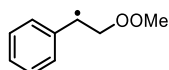

CBS-QB3 Enthalpy= -499.006444 CBS-QB3 Free Energy= -499.056571

|     |             |             |             |
|-----|-------------|-------------|-------------|
| 0 2 |             |             |             |
| C   | 1.73037100  | 1.16456700  | -0.85080900 |
| H   | 1.49781200  | 0.67112000  | -1.79821000 |
| H   | 2.22265200  | 2.11594700  | -1.07535100 |
| C   | 0.52729400  | 1.38766900  | 0.00125200  |
| H   | 0.60406300  | 2.17635400  | 0.74403200  |
| C   | -0.67837700 | 0.65000100  | -0.03815000 |
| C   | -1.76231700 | 1.02918900  | 0.80603600  |
| C   | -0.88388200 | -0.47103500 | -0.89245000 |
| C   | -2.96500200 | 0.34740500  | 0.78568300  |
| H   | -1.63115200 | 1.87715600  | 1.47017800  |
| C   | -2.09279200 | -1.14539200 | -0.90284000 |
| H   | -0.07294300 | -0.81801400 | -1.51871800 |
| C   | -3.14379700 | -0.74445600 | -0.07131300 |
| H   | -3.77312800 | 0.66140100  | 1.43719200  |
| H   | -2.22232600 | -1.99849500 | -1.55990200 |
| H   | -4.08688800 | -1.27822400 | -0.08679800 |
| O   | 2.78634600  | 0.43245800  | -0.19618700 |
| O   | 2.35878100  | -0.95942300 | -0.13687800 |
| C   | 2.43031200  | -1.34699500 | 1.22476300  |
| H   | 2.16865100  | -2.40793900 | 1.22273400  |
| H   | 3.44426100  | -1.22002000 | 1.61662900  |
| H   | 1.71711800  | -0.78927900 | 1.83970500  |

styrene – methylperoxyl fragmentation TS

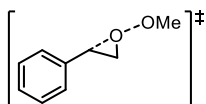

TS freq.: -638.56 cm<sup>-1</sup>  
CBS-QB3 Enthalpy= -498.978994 CBS-QB3 Free Energy= -499.031039

|     |             |             |             |
|-----|-------------|-------------|-------------|
| 0 2 |             |             |             |
| C   | -1.40639500 | -0.73648200 | -1.14715000 |
| H   | -1.20812900 | 0.03391600  | -1.89986400 |
| H   | -2.04533200 | -1.52223100 | -1.56368200 |
| C   | -0.23043600 | -1.23641800 | -0.40284500 |
| H   | -0.33650000 | -2.20604900 | 0.06823500  |
| C   | 0.97770500  | -0.50869700 | -0.16350600 |
| C   | 2.02967900  | -1.13294600 | 0.54555800  |
| C   | 1.18130100  | 0.81031800  | -0.63187400 |
| C   | 3.23501100  | -0.48070200 | 0.75538800  |
| H   | 1.88486500  | -2.14019800 | 0.92125000  |

|   |             |             |             |
|---|-------------|-------------|-------------|
| C | 2.38450100  | 1.45953900  | -0.40876800 |
| H | 0.37648600  | 1.32677300  | -1.13896200 |
| C | 3.41929500  | 0.81826000  | 0.27839000  |
| H | 4.03197700  | -0.97895900 | 1.29543900  |
| H | 2.52154900  | 2.47364100  | -0.76656500 |
| H | 4.35902200  | 1.33139600  | 0.44705600  |
| O | -1.84157300 | -0.24656900 | 0.07872500  |
| O | -3.52306000 | 0.41458300  | -0.20827300 |
| C | -3.97024100 | 0.67961400  | 1.07826000  |
| H | -4.97843900 | 1.10649000  | 0.95631300  |
| H | -4.05977300 | -0.22562500 | 1.69503800  |
| H | -3.35118500 | 1.42180900  | 1.60140400  |

styrene oxide

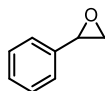

CBS-QB3 Enthalpy= -384.155298 CBS-QB3 Free Energy= -384.195750

|     |             |             |             |
|-----|-------------|-------------|-------------|
| 0 1 |             |             |             |
| C   | -2.58859700 | -0.28549200 | 0.11501200  |
| C   | -2.13830700 | 1.03206200  | 0.05672800  |
| C   | -0.77802500 | 1.29959000  | -0.07255800 |
| C   | 0.14712200  | 0.25346500  | -0.13501800 |
| C   | -0.31065500 | -1.06615200 | -0.08612400 |
| C   | -1.67126700 | -1.33229600 | 0.03973300  |
| H   | -3.64800600 | -0.49487200 | 0.21077800  |
| H   | -2.84676000 | 1.85145500  | 0.10593000  |
| H   | -0.43241500 | 2.32736800  | -0.12611400 |
| H   | 0.40826800  | -1.87277300 | -0.16649400 |
| H   | -2.01713400 | -2.35957800 | 0.07168000  |
| C   | 1.60344100  | 0.55583000  | -0.24770200 |
| C   | 2.58294800  | 0.07767900  | 0.74779500  |
| H   | 1.84538400  | 1.47561000  | -0.77788800 |
| H   | 3.49225600  | 0.64658600  | 0.92837400  |
| H   | 2.22887000  | -0.52910100 | 1.57769900  |
| O   | 2.48619700  | -0.53160200 | -0.54139600 |

styrene – methylperoxyl + oxygen adduct

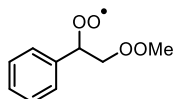

CBS-QB3 Enthalpy= -649.205976 CBS-QB3 Free Energy= -649.262498

|     |             |             |             |
|-----|-------------|-------------|-------------|
| 0 2 |             |             |             |
| C   | 1.37498000  | 0.82052500  | 0.62628200  |
| H   | 0.89938400  | 1.06904400  | 1.57531400  |
| H   | 2.18699100  | 1.52690000  | 0.42563900  |
| C   | 0.35104400  | 0.86310600  | -0.52498600 |
| H   | 0.83922500  | 0.50807900  | -1.43312600 |
| C   | -0.90667600 | 0.06036100  | -0.27417500 |
| C   | -0.89448500 | -1.30323800 | -0.58573600 |
| C   | -2.05889200 | 0.62364700  | 0.28031200  |
| C   | -2.01393500 | -2.09277400 | -0.33956800 |
| H   | -0.00072500 | -1.74488700 | -1.01163400 |
| C   | -3.18027700 | -0.16798900 | 0.51806400  |
| H   | -2.08559500 | 1.67926500  | 0.51928900  |
| C   | -3.16133600 | -1.52647700 | 0.21150700  |
| H   | -1.99088700 | -3.14893800 | -0.58348500 |
| H   | -4.07139300 | 0.28118800  | 0.94186400  |
| H   | -4.03636400 | -2.13908100 | 0.39711000  |
| O   | 1.88096400  | -0.48482000 | 0.82026200  |
| O   | 2.67476700  | -0.81013000 | -0.36953400 |
| C   | 3.84611900  | -1.44397000 | 0.11622100  |
| H   | 4.40333400  | -1.71492200 | -0.78332700 |
| H   | 3.59930900  | -2.34681200 | 0.68262400  |
| H   | 4.44080500  | -0.76410100 | 0.73417100  |
| O   | 0.05313700  | 2.25743400  | -0.86055700 |
| O   | -0.14928300 | 3.01190600  | 0.20583400  |

styrene – methylperoxyl 1,4-HAT TS

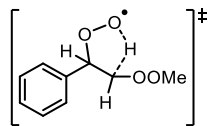

TS freq.: -1880.11 cm<sup>-1</sup>

CBS-QB3 Enthalpy= -649.163028 CBS-QB3 Free Energy= -649.218834

| Atom | Enthalpy (kcal/mol) | Free Energy (kcal/mol) | Frequency (cm <sup>-1</sup> ) |
|------|---------------------|------------------------|-------------------------------|
| 0    |                     |                        | 2                             |
| C    | 1.34574300          | 0.51001400             | 0.32504300                    |
| H    | 1.14093000          | 0.32248000             | 1.38003100                    |
| H    | 1.83208600          | 1.74484000             | 0.18977900                    |
| C    | 0.14595700          | 0.94257700             | -0.55017700                   |
| H    | 0.44672600          | 0.82898600             | -1.59845300                   |
| C    | -1.14163600         | 0.21742100             | -0.26993400                   |
| C    | -1.52950600         | -0.84960500            | -1.08472900                   |
| C    | -1.94384700         | 0.57472000             | 0.81948900                    |
| C    | -2.69839800         | -1.55546500            | -0.81307500                   |
| H    | -0.91491400         | -1.12604100            | -1.93496300                   |
| C    | -3.11821500         | -0.12426100            | 1.08175900                    |
| H    | -1.65237000         | 1.41160500             | 1.44210000                    |
| C    | -3.49617300         | -1.19293900            | 0.27015500                    |
| H    | -2.99021900         | -2.38174500            | -1.45140100                   |
| H    | -3.74010300         | 0.16593500             | 1.92110700                    |
| H    | -4.41006100         | -1.73764000            | 0.47865100                    |
| O    | 2.07248300          | -0.48585500            | -0.26331700                   |
| O    | 2.80378100          | -1.19623100            | 0.77964600                    |
| C    | 3.79989800          | -1.94529800            | 0.10060400                    |
| H    | 4.31468800          | -2.48004500            | 0.90089500                    |
| H    | 4.50039900          | -1.28948400            | -0.42342100                   |
| H    | 3.35033600          | -2.66044800            | -0.59405500                   |
| O    | 0.01656800          | 2.32734700             | -0.21771600                   |
| O    | 1.34961400          | 2.82206100             | -0.24674900                   |

styrene – methylperoxyl – hydroperoxyl radical elimination TS

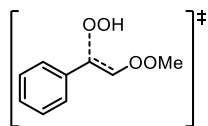

TS freq.: -482.17 cm<sup>-1</sup>

CBS-QB3 Enthalpy= -649.168326 CBS-QB3 Free Energy= -649.224573

| Atom | Enthalpy (kcal/mol) | Free Energy (kcal/mol) | Frequency (cm <sup>-1</sup> ) |
|------|---------------------|------------------------|-------------------------------|
| 0    |                     |                        | 2                             |
| C    | 1.27650400          | -0.82150200            | 0.36485000                    |
| H    | -0.56729000         | 2.34656900             | -0.19907400                   |
| H    | 1.20708200          | -0.67198500            | 1.43482100                    |
| C    | 0.29588000          | -0.45733500            | -0.55994000                   |
| H    | 0.48833900          | -0.78155100            | -1.57763500                   |
| C    | -1.12863900         | -0.35737700            | -0.18808700                   |
| C    | -1.54294400         | 0.07199500             | 1.08306000                    |
| C    | -2.10946200         | -0.64994800            | -1.14689100                   |
| C    | -2.89702300         | 0.18519800             | 1.38504400                    |
| H    | -0.80695600         | 0.32713200             | 1.83492800                    |
| C    | -3.46185200         | -0.54052800            | -0.84200100                   |
| H    | -1.80299900         | -0.96857200            | -2.13729400                   |
| C    | -3.86086300         | -0.12367400            | 0.42680900                    |
| H    | -3.19979300         | 0.51593100             | 2.37217400                    |
| H    | -4.20454700         | -0.77941200            | -1.59473800                   |
| H    | -4.91451400         | -0.03813900            | 0.66660100                    |
| O    | 2.44688500          | -1.28958500            | -0.09592700                   |
| O    | 3.55130200          | -0.72035600            | 0.72572500                    |
| C    | 4.08535200          | 0.36416100             | -0.02915800                   |
| H    | 4.84525400          | 0.79120900             | 0.63074900                    |
| H    | 3.31577800          | 1.10791700             | -0.25210700                   |
| H    | 4.55428800          | 0.00771100             | -0.95085800                   |
| O    | 0.76999700          | 1.31322700             | -1.01474800                   |
| O    | 0.37477000          | 2.21136900             | -0.01376000                   |

styrene – 2-methylperoxyl

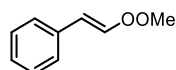

CBS-QB3 Enthalpy= -498.442849 CBS-QB3 Free Energy= -498.493255

| 0 1 |             |             |             |
|-----|-------------|-------------|-------------|
| C   | -1.32068400 | -0.87106500 | 0.08305600  |
| H   | -0.99767700 | -1.86609300 | 0.37018900  |
| C   | -0.49684000 | 0.15261900  | -0.15803800 |
| H   | -0.93404600 | 1.10992300  | -0.41054300 |
| C   | 0.96733600  | 0.08810900  | -0.07781000 |
| C   | 1.69262600  | -1.11642000 | -0.07030100 |
| C   | 1.69570800  | 1.28728400  | -0.01339400 |
| C   | 3.07880300  | -1.11745000 | 0.02564000  |
| H   | 1.17178600  | -2.06308600 | -0.16125100 |
| C   | 3.08407400  | 1.28639700  | 0.07724700  |
| H   | 1.15908500  | 2.23029600  | -0.02860800 |
| C   | 3.78478900  | 0.08324700  | 0.10222500  |
| H   | 3.61364400  | -2.06104400 | 0.02804800  |
| H   | 3.61902700  | 2.22848200  | 0.12777600  |
| H   | 4.86657000  | 0.07905200  | 0.17060200  |
| O   | -2.68204800 | -0.89358300 | 0.02720200  |
| O   | -3.19775600 | 0.38752000  | -0.43241000 |
| C   | -4.38540700 | 0.60001300  | 0.31441000  |
| H   | -4.78393500 | 1.53575400  | -0.08298500 |
| H   | -4.17339300 | 0.70563200  | 1.38232900  |
| H   | -5.10506700 | -0.20680900 | 0.14789400  |

styrene – 2-methylperoxyl 1-hydroperoxyl peroxide fragmentation TS

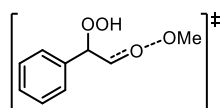

TS freq.: -64.32 cm<sup>-1</sup>  
CBS-QB3 Enthalpy= -649.192468 CBS-QB3 Free Energy= -649.248404

| 0 2 |             |             |             |
|-----|-------------|-------------|-------------|
| C   | 1.26902400  | -0.55205100 | 0.03787600  |
| H   | -0.98091000 | 2.75275100  | 0.05258100  |
| H   | 1.21121300  | -1.06368500 | 0.98695300  |
| C   | 0.28454700  | 0.43496700  | -0.45594700 |
| H   | 0.42807900  | 0.60153000  | -1.52858000 |
| C   | -1.13801100 | -0.01983500 | -0.18087500 |
| C   | -1.89926100 | -0.62403100 | -1.18363400 |
| C   | -1.69705700 | 0.14825500  | 1.08984900  |
| C   | -3.19453900 | -1.06214400 | -0.92088000 |
| H   | -1.47508300 | -0.75079600 | -2.17427500 |
| C   | -2.99444800 | -0.28711100 | 1.35249900  |
| H   | -1.11161900 | 0.62718200  | 1.86704100  |
| C   | -3.74542800 | -0.89501100 | 0.34864000  |
| H   | -3.77605500 | -1.52853100 | -1.70822500 |
| H   | -3.41824600 | -0.15162300 | 2.34141800  |
| H   | -4.75523400 | -1.23265300 | 0.55253200  |
| O   | 2.48183100  | -0.50044500 | -0.57434500 |
| O   | 3.43507500  | -1.28838500 | 0.19267800  |
| C   | 4.54497200  | -0.42955500 | 0.42334300  |
| H   | 5.25152000  | -1.05474700 | 0.97354800  |
| H   | 4.25792800  | 0.43659000  | 1.02619600  |
| H   | 4.99395000  | -0.10543800 | -0.51944300 |
| O   | 0.58714400  | 1.68742500  | 0.21782300  |
| O   | -0.15459200 | 2.74997000  | -0.45302800 |

styrene – 1-hydroperoxyl aldehyde product

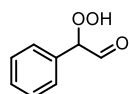

CBS-QB3 Enthalpy= -534.384427 CBS-QB3 Free Energy= -534.431522

|     |             |             |             |
|-----|-------------|-------------|-------------|
| 0 1 |             |             |             |
| C   | 1.62175300  | 0.45082500  | 1.21647600  |
| H   | 3.34984600  | 0.09783800  | -0.68358900 |
| H   | 1.20085700  | 0.40225000  | 2.24263700  |
| C   | 1.00404300  | -0.53766600 | 0.22839500  |
| H   | 1.16043500  | -1.54895500 | 0.62981100  |
| C   | -0.47736800 | -0.25824700 | 0.08472300  |
| C   | -1.42697200 | -1.17795500 | 0.53358300  |
| C   | -0.90187500 | 0.94067700  | -0.49895700 |
| C   | -2.78654900 | -0.90142400 | 0.40887100  |
| H   | -1.10344300 | -2.11538600 | 0.97305700  |
| C   | -2.26015900 | 1.21045800  | -0.63200900 |
| H   | -0.16546100 | 1.64987500  | -0.85814500 |
| C   | -3.20443100 | 0.29197400  | -0.17529900 |
| H   | -3.51737000 | -1.62143800 | 0.75883200  |
| H   | -2.58204900 | 2.13813200  | -1.09106400 |
| H   | -4.26246300 | 0.50476100  | -0.27759800 |
| O   | 2.48997400  | 1.23605300  | 0.92738500  |
| O   | 1.58385600  | -0.42431900 | -1.06201800 |
| O   | 2.98979500  | -0.76410100 | -0.95144600 |

styrene – methoxy radical addition TS

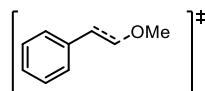

TS freq.: -235.13 cm<sup>-1</sup>

CBS-QB3 Enthalpy= -423.899386 CBS-QB3 Free Energy= -423.948723

|     |             |             |             |
|-----|-------------|-------------|-------------|
| 0 2 |             |             |             |
| C   | 1.35723500  | -1.13402100 | -0.65661500 |
| C   | 0.39062600  | -0.59626100 | 0.21442500  |
| C   | 0.71739300  | 0.58584800  | 0.90875600  |
| C   | 1.95034300  | 1.19795600  | 0.73301000  |
| C   | 2.89430300  | 0.65002300  | -0.13792700 |
| C   | 2.59149800  | -0.52004300 | -0.83186900 |
| C   | -0.88523800 | -1.28278000 | 0.36233700  |
| C   | -1.97233500 | -0.85750500 | 1.05762000  |
| C   | -2.49213100 | 1.31348000  | -0.91414000 |
| H   | 1.12590700  | -2.04452800 | -1.19943000 |
| H   | 0.00253000  | 1.02282700  | 1.59551200  |
| H   | 2.18137400  | 2.10588200  | 1.27893700  |
| H   | 3.85666100  | 1.13077000  | -0.27105600 |
| H   | 3.31821500  | -0.95380500 | -1.50952100 |
| H   | -2.83528300 | -1.49737100 | 1.16429100  |
| H   | -1.94873700 | 0.01860100  | 1.69282200  |
| H   | -0.98026800 | -2.20890600 | -0.19780100 |
| H   | -1.56640700 | 1.11457000  | -1.47547000 |
| H   | -3.18958600 | 1.79036900  | -1.62451400 |
| H   | -2.28257100 | 2.04892600  | -0.11978900 |
| O   | -3.12399900 | 0.16656000  | -0.46844500 |

styrene – methoxy adduct

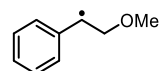

CBS-QB3 Enthalpy= -423.946747 CBS-QB3 Free Energy= -423.993510

|     |             |             |             |
|-----|-------------|-------------|-------------|
| 0 2 |             |             |             |
| C   | 1.51172500  | 1.28380300  | 0.25779600  |
| C   | 0.38385300  | 0.52716000  | -0.17047200 |
| C   | 0.58518900  | -0.86119500 | -0.41846700 |
| C   | 1.83546600  | -1.43490900 | -0.25936500 |
| C   | 2.92874600  | -0.66706500 | 0.15473800  |
| C   | 2.75423000  | 0.69703800  | 0.41426900  |
| C   | -0.86795400 | 1.16310800  | -0.34301300 |
| C   | -2.11105600 | 0.50164900  | -0.86565600 |
| C   | -2.93916900 | -0.45378600 | 1.15005200  |
| H   | 1.38357000  | 2.34283400  | 0.45690700  |
| H   | -0.26081700 | -1.46985900 | -0.70920800 |
| H   | 1.96538800  | -2.49395900 | -0.45436100 |

|   |             |             |             |
|---|-------------|-------------|-------------|
| H | 3.90313200  | -1.12560900 | 0.27762000  |
| H | 3.59705500  | 1.29800600  | 0.73787700  |
| H | -2.93808900 | 1.22588900  | -0.86278800 |
| H | -1.96567600 | 0.17720800  | -1.90326900 |
| H | -0.91988200 | 2.22767800  | -0.13567400 |
| H | -3.79134600 | 0.24130500  | 1.17696800  |
| H | -3.25589300 | -1.41634700 | 1.55254600  |
| H | -2.13602000 | -0.04988100 | 1.77890300  |
| O | -2.50845000 | -0.68651100 | -0.17935200 |

styrene – methoxy fragmentation TS

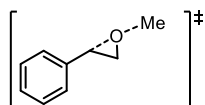

TS freq.: -767.94 cm<sup>-1</sup>

CBS-QB3 Enthalpy= -423.860107 CBS-QB3 Free Energy= -423.909242

|   |             |             |             |
|---|-------------|-------------|-------------|
| 0 | 2           |             |             |
| C | 1.55464700  | -1.22838100 | -0.30188000 |
| C | 0.48891900  | -0.43976500 | 0.16996000  |
| C | 0.73459500  | 0.92267800  | 0.42831100  |
| C | 1.99822900  | 1.46276900  | 0.23625900  |
| C | 3.04992500  | 0.66258500  | -0.21536500 |
| C | 2.82068300  | -0.68564700 | -0.48525200 |
| C | -0.80697500 | -1.05619900 | 0.37778300  |
| C | -1.95710200 | -0.43042700 | 1.03212300  |
| C | -3.93133600 | 0.78782900  | -0.81369000 |
| H | 1.38055600  | -2.27745500 | -0.51748800 |
| H | -0.07853000 | 1.56157200  | 0.74998100  |
| H | 2.16680400  | 2.51548900  | 0.43445700  |
| H | 4.03555800  | 1.08915700  | -0.36198900 |
| H | 3.62885100  | -1.31348100 | -0.84353400 |
| H | -2.68661400 | -1.10182300 | 1.49632700  |
| H | -1.76937400 | 0.44856500  | 1.65646500  |
| H | -0.91768700 | -2.09099700 | 0.08093500  |
| H | -4.64567000 | 0.05758100  | -0.45821100 |
| H | -3.81360500 | 1.70065100  | -0.24536800 |
| H | -3.74484700 | 0.83179100  | -1.87643800 |
| O | -2.15811900 | -0.17421100 | -0.33557900 |

styrene – methoxy + oxygen adduct

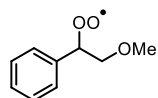

CBS-QB3 Enthalpy= -574.146964 CBS-QB3 Free Energy= -574.200056

|   |             |             |             |
|---|-------------|-------------|-------------|
| 0 | 2           |             |             |
| C | 1.46214200  | 0.92406100  | -0.47744900 |
| C | 0.62320700  | 0.16112500  | 0.33878900  |
| C | 1.07516100  | -1.07219700 | 0.81922600  |
| C | 2.34192300  | -1.53944900 | 0.48118700  |
| C | 3.17528800  | -0.77512400 | -0.33278800 |
| C | 2.73205400  | 0.45628900  | -0.80870500 |
| C | -0.77805100 | 0.60960900  | 0.70074800  |
| C | -1.87904900 | 0.04907000  | -0.20716600 |
| C | -2.91112200 | -2.01117600 | -0.71011700 |
| H | 1.12984900  | 1.88470100  | -0.84996900 |
| H | 0.42521500  | -1.67059900 | 1.44651100  |
| H | 2.67953700  | -2.49801800 | 0.85901100  |
| H | 4.16497000  | -1.13494000 | -0.59059700 |
| H | 3.37640200  | 1.05985700  | -1.43798100 |
| H | -2.80960900 | 0.60885000  | -0.03548800 |
| H | -1.60020600 | 0.15642700  | -1.26130200 |
| H | -1.00561000 | 0.31329200  | 1.72685700  |
| H | -2.54697400 | -2.00816900 | -1.74628400 |
| H | -2.95729500 | -3.03916800 | -0.35094800 |
| H | -3.92113100 | -1.57887200 | -0.68992900 |
| O | -2.03044400 | -1.31018100 | 0.14890300  |
| O | -0.86907700 | 2.06914700  | 0.76989100  |
| O | -1.09853800 | 2.62770800  | -0.40532300 |

styrene – methoxy 1,4-HAT TS

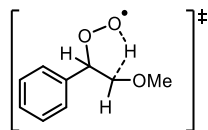

TS freq.: -1896.36 cm<sup>-1</sup>

CBS-QB3 Enthalpy= -574.108249 CBS-QB3 Free Energy= -574.159572

| 0 2 |             |             |             |
|-----|-------------|-------------|-------------|
| C   | 1.47781200  | -0.87357000 | 0.75287600  |
| C   | 0.76339000  | -0.24872800 | -0.27516800 |
| C   | 1.38312100  | 0.75352700  | -1.02742700 |
| C   | 2.69517300  | 1.13066600  | -0.75471800 |
| C   | 3.40448600  | 0.50123900  | 0.26642600  |
| C   | 2.79394500  | -0.50353400 | 1.01517800  |
| C   | -0.67203600 | -0.60545000 | -0.55209900 |
| C   | -1.70493200 | 0.12679300  | 0.32779000  |
| C   | -2.80117000 | 2.18896200  | 0.68622900  |
| H   | 1.00344300  | -1.65974800 | 1.32705400  |
| H   | 0.83498800  | 1.23737700  | -1.82887800 |
| H   | 3.16629100  | 1.90868900  | -1.34485100 |
| H   | 4.42890300  | 0.78888500  | 0.47442500  |
| H   | 3.34448500  | -1.00167600 | 1.80538600  |
| H   | -2.50681300 | -0.92771700 | 0.16696000  |
| H   | -1.45558400 | 0.17879200  | 1.39455300  |
| H   | -0.94028100 | -0.40103900 | -1.59539100 |
| H   | -2.15111300 | 2.44583800  | 1.52941800  |
| H   | -3.03770400 | 3.08674500  | 0.11823700  |
| H   | -3.72580600 | 1.73795700  | 1.06020300  |
| O   | -2.13450800 | 1.30167900  | -0.21113100 |
| O   | -0.91267500 | -1.97945200 | -0.23506800 |
| O   | -2.32776100 | -2.09891800 | -0.27150600 |

styrene – methoxy – hydroperoxyl

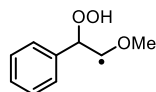

CBS-QB3 Enthalpy= -574.133646 CBS-QB3 Free Energy= -574.186777

| 0 2 |             |             |             |
|-----|-------------|-------------|-------------|
| C   | -1.77746100 | 1.06303000  | 0.25295700  |
| C   | -0.90760000 | 0.05372600  | -0.16765000 |
| C   | -1.42235600 | -1.22101400 | -0.42800800 |
| C   | -2.78086300 | -1.48215700 | -0.27036500 |
| C   | -3.64250500 | -0.47332300 | 0.15497200  |
| C   | -3.13559600 | 0.79712200  | 0.41565600  |
| C   | 0.56886000  | 0.33184700  | -0.38898500 |
| C   | 1.44402200  | -0.75509400 | 0.13025900  |
| C   | 3.64698000  | -1.54600900 | 0.44051000  |
| H   | -1.38403100 | 2.05040100  | 0.45297100  |
| H   | -0.75651700 | -2.00967500 | -0.76101500 |
| H   | -3.16507100 | -2.47428100 | -0.48005700 |
| H   | -4.70014900 | -0.67620700 | 0.28066200  |
| H   | -3.79886900 | 1.58876700  | 0.74625100  |
| H   | 1.20563400  | -1.25862600 | 1.06538500  |
| H   | 2.74680300  | 1.60569800  | -0.12827100 |
| H   | 0.77234400  | 0.50271800  | -1.45234900 |
| H   | 3.41092100  | -2.55552800 | 0.09141000  |
| H   | 4.65678800  | -1.27941600 | 0.13339400  |
| H   | 3.57145100  | -1.50855500 | 1.53267500  |
| O   | 2.76836200  | -0.59366900 | -0.15966400 |
| O   | 0.89831600  | 1.58700800  | 0.28000900  |
| O   | 2.01829900  | 2.18240200  | -0.40998700 |

styrene – methoxy – hydroperoxyl radical elimination TS



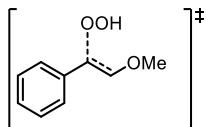

TS freq.: -494.87 cm<sup>-1</sup>

CBS-QB3 Enthalpy= -574.112146 CBS-QB3 Free Energy= -574.165652

| 0 2 |             |             |             |
|-----|-------------|-------------|-------------|
| C   | -1.85632900 | 0.64302100  | -1.03292000 |
| C   | -0.67398800 | 0.14634000  | -0.46095000 |
| C   | -0.77787200 | -0.86042800 | 0.51353900  |
| C   | -2.02633800 | -1.35580400 | 0.88560200  |
| C   | -3.18898100 | -0.86216500 | 0.29937100  |
| C   | -3.09869300 | 0.14189100  | -0.66421200 |
| C   | 0.61179400  | 0.75165000  | -0.86762100 |
| C   | 1.84107200  | 0.08872600  | -0.91847800 |
| C   | 3.46199900  | -1.41487900 | -0.12035600 |
| H   | -1.79365400 | 1.43266700  | -1.77410300 |
| H   | 0.11935800  | -1.25679200 | 0.96482700  |
| H   | -2.08770500 | -2.13539100 | 1.63710300  |
| H   | -4.15695200 | -1.25464400 | 0.58992200  |
| H   | -3.99727100 | 0.53647200  | -1.12530100 |
| H   | 2.68554600  | 0.54687900  | -1.42311600 |
| H   | 0.05103500  | 1.30986800  | 1.92929900  |
| H   | 0.51718600  | 1.50478100  | -1.64318600 |
| H   | 4.04340900  | -0.67092500 | 0.43155400  |
| H   | 3.48091500  | -2.36373500 | 0.41213400  |
| H   | 3.88336100  | -1.55007300 | -1.12187400 |
| O   | 2.09161100  | -1.01980400 | -0.19751200 |
| O   | 0.86974700  | 2.07085100  | 0.42103700  |
| O   | 0.97599100  | 1.47780000  | 1.69133500  |

styrene – 2-methoxy

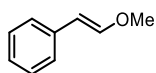

CBS-QB3 Enthalpy= -423.388745 CBS-QB3 Free Energy= -423.433951

| 0 1 |             |             |             |
|-----|-------------|-------------|-------------|
| C   | 1.29218600  | 1.27374200  | -0.05056100 |
| C   | 0.48286100  | 0.12957700  | 0.04451100  |
| C   | 1.12655400  | -1.11802700 | 0.12518900  |
| C   | 2.51231700  | -1.21347300 | 0.08318300  |
| C   | 3.29938200  | -0.06693800 | -0.02426600 |
| C   | 2.67974500  | 1.17868800  | -0.08583700 |
| C   | -0.97735400 | 0.28863500  | 0.06595200  |
| C   | -1.86116100 | -0.69036900 | -0.18223100 |
| C   | -3.80417500 | 0.63600900  | 0.15396000  |
| H   | 0.82072500  | 2.24982900  | -0.10533500 |
| H   | 0.54044700  | -2.02240100 | 0.24217200  |
| H   | 2.98253500  | -2.18876300 | 0.14785900  |
| H   | 4.38022500  | -0.14465400 | -0.05010300 |
| H   | 3.27757000  | 2.08041600  | -0.16209600 |
| H   | -1.55604100 | -1.69812000 | -0.43863300 |
| H   | -1.33501400 | 1.29110000  | 0.27261800  |
| H   | -3.52590400 | 1.40727400  | -0.57271700 |
| H   | -4.88053900 | 0.47719900  | 0.12274800  |
| H   | -3.50773000 | 0.96080400  | 1.15741300  |
| O   | -3.21230100 | -0.61497000 | -0.17416500 |

styrene – 2-methoxy 1-hydroperoxy ether fragmentation TS

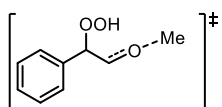

TS freq.: -592.90 cm<sup>-1</sup>

CBS-QB3 Enthalpy= -574.095947 CBS-QB3 Free Energy= -574.149980

|     |             |             |             |
|-----|-------------|-------------|-------------|
| 0 2 |             |             |             |
| C   | 1.46583000  | -0.35274200 | -1.03020900 |
| C   | 0.94349000  | 0.09745000  | 0.18699300  |
| C   | 1.80983400  | 0.33378600  | 1.25539200  |
| C   | 3.17861100  | 0.11276700  | 1.11687700  |
| C   | 3.69231700  | -0.33495400 | -0.09767200 |
| C   | 2.83376500  | -0.56376500 | -1.17224800 |
| C   | -0.54447700 | 0.33300500  | 0.32742400  |
| C   | -1.34044000 | -0.94066200 | 0.10165800  |
| C   | -4.05002100 | -0.96430700 | 0.64082200  |
| H   | 0.79725300  | -0.52554700 | -1.86570000 |
| H   | 1.41294800  | 0.69621400  | 2.19776500  |
| H   | 3.84245900  | 0.29705100  | 1.95394200  |
| H   | 4.75771900  | -0.50286600 | -0.20813700 |
| H   | 3.23056500  | -0.90745100 | -2.12081500 |
| H   | -0.94885900 | -1.85874300 | 0.56124000  |
| H   | -2.73894900 | 1.07393100  | -0.76680900 |
| H   | -0.76189800 | 0.71670200  | 1.33667900  |
| H   | -3.99621000 | 0.00052700  | 1.12916200  |
| H   | -4.79133200 | -1.07449700 | -0.13879600 |
| H   | -3.87417600 | -1.83613300 | 1.25792000  |
| O   | -2.47658800 | -0.94580700 | -0.45427500 |
| O   | -0.88807300 | 1.35244100  | -0.61890400 |
| O   | -2.24321100 | 1.79303400  | -0.34065600 |

### cyclooctene

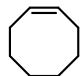

CBS-QB3 Enthalpy= -312.578164 CBS-QB3 Free Energy= -312.618354

|     |             |             |             |
|-----|-------------|-------------|-------------|
| 0 1 |             |             |             |
| C   | -1.71895300 | 0.79825400  | -0.04838400 |
| C   | -1.66162600 | -0.68373900 | 0.38836700  |
| C   | 1.86966500  | 0.49312400  | 0.05720500  |
| C   | -0.76130100 | -1.56655300 | -0.44498700 |
| C   | 1.37834800  | -0.84738000 | 0.65116500  |
| C   | 0.56381000  | -1.65777700 | -0.31857800 |
| H   | -1.94967100 | 0.84775300  | -1.11953200 |
| H   | -1.36244000 | -0.72429700 | 1.44231900  |
| H   | 2.65456500  | 0.29486100  | -0.68226400 |
| H   | 2.24976600  | -1.42068500 | 0.98400900  |
| H   | -2.56895800 | 1.26128900  | 0.46659800  |
| H   | -2.67839800 | -1.08689600 | 0.34835500  |
| H   | 2.34681100  | 1.06480600  | 0.86235500  |
| H   | -1.24867600 | -2.15694100 | -1.21766100 |
| H   | 0.78669400  | -0.63925900 | 1.54798500  |
| C   | -0.47307500 | 1.66176300  | 0.23365100  |
| H   | -0.76643300 | 2.70100600  | 0.05093800  |
| H   | -0.22955800 | 1.61265300  | 1.30277300  |
| C   | 0.78822200  | 1.36099300  | -0.61071800 |
| H   | 1.26378900  | 2.30889900  | -0.88423400 |
| H   | 0.48242700  | 0.89803100  | -1.55408800 |
| H   | 1.10955000  | -2.31332500 | -0.99388300 |

### cyclooctene – methylperoxy radical addition TS

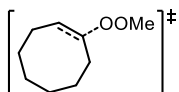

TS freq.: -468.28 cm<sup>-1</sup>

CBS-QB3 Enthalpy= -502.519883 CBS-QB3 Free Energy= -502.572395

|     |             |             |             |
|-----|-------------|-------------|-------------|
| 0 2 |             |             |             |
| C   | 2.38115200  | -1.52475600 | 0.05700900  |
| C   | 0.87734200  | -1.72578200 | -0.25769600 |
| C   | 1.37977300  | 1.93480400  | -0.03001000 |
| C   | -0.06435600 | -0.95813600 | 0.62090500  |
| C   | 0.14699600  | 1.23028600  | -0.63287800 |
| C   | -0.55201800 | 0.31150600  | 0.33563800  |
| H   | 2.55894500  | -1.75834200 | 1.11375500  |

|   |             |             |             |
|---|-------------|-------------|-------------|
| H | 0.69842500  | -1.47229800 | -1.30803500 |
| H | 1.04648200  | 2.66323100  | 0.71894100  |
| H | -0.56325900 | 1.98580800  | -0.97732100 |
| H | 2.94001400  | -2.27118100 | -0.51887500 |
| H | 0.65528400  | -2.79303000 | -0.15704200 |
| H | 1.84868500  | 2.51889700  | -0.83057900 |
| H | -0.47126700 | -1.47497000 | 1.48486900  |
| H | 0.44100300  | 0.66242200  | -1.51932000 |
| C | 2.96901700  | -0.13625500 | -0.25232600 |
| H | 4.05273500  | -0.21232500 | -0.11555100 |
| H | 2.82379900  | 0.09344700  | -1.31529100 |
| C | 2.44363100  | 1.03013200  | 0.61768300  |
| H | 3.28427600  | 1.67416100  | 0.89621100  |
| H | 2.05741600  | 0.62612800  | 1.55975300  |
| H | -1.10129600 | 0.80735400  | 1.13141900  |
| O | -2.06262200 | -0.03441100 | -0.78975300 |
| O | -3.10465400 | -0.66560500 | -0.11850400 |
| C | -3.96994700 | 0.32042600  | 0.43491700  |
| H | -4.79693700 | -0.23683100 | 0.88021800  |
| H | -3.46181600 | 0.90575500  | 1.20932600  |
| H | -4.34382400 | 0.98854600  | -0.34588100 |

cyclooctene – methylperoxyl adduct

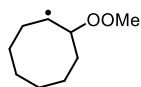

CBS-QB3 Enthalpy= -502.543768 CBS-QB3 Free Energy= -502.596945

|     |             |             |             |
|-----|-------------|-------------|-------------|
| 0 2 |             |             |             |
| C   | 2.29745000  | -1.58660400 | -0.09183400 |
| C   | 0.76193000  | -1.70111000 | -0.27983900 |
| C   | 1.39580600  | 1.90654500  | 0.08184200  |
| C   | -0.03924700 | -0.87457800 | 0.67065600  |
| C   | 0.15153400  | 1.32307800  | -0.60511100 |
| C   | -0.70568700 | 0.39879200  | 0.27148000  |
| H   | 2.55074000  | -1.90443000 | 0.92701700  |
| H   | 0.50606500  | -1.44449600 | -1.31342400 |
| H   | 1.07918200  | 2.56584700  | 0.89907700  |
| H   | -0.48651800 | 2.14701200  | -0.93823100 |
| H   | 2.77601000  | -2.30623200 | -0.76613100 |
| H   | 0.49351200  | -2.75736400 | -0.15238000 |
| H   | 1.89140400  | 2.55523100  | -0.64990500 |
| H   | -0.19678300 | -1.24375100 | 1.67831000  |
| H   | 0.43919200  | 0.77843500  | -1.50861100 |
| C   | 2.90438800  | -0.19494500 | -0.33962100 |
| H   | 3.99172000  | -0.29667500 | -0.26196600 |
| H   | 2.71213600  | 0.11005600  | -1.37559000 |
| C   | 2.43602500  | 0.91263800  | 0.63494700  |
| H   | 3.30266700  | 1.50292900  | 0.95114000  |
| H   | 2.05101500  | 0.44529400  | 1.54746700  |
| H   | -1.05140000 | 0.94029000  | 1.16001700  |
| O   | -1.86863200 | 0.15141600  | -0.56943200 |
| O   | -2.83921100 | -0.58366600 | 0.23775600  |
| C   | -4.06985100 | 0.08998200  | 0.05525300  |
| H   | -4.79359900 | -0.49396400 | 0.62950900  |
| H   | -4.03218000 | 1.11541700  | 0.43981200  |
| H   | -4.36451500 | 0.10162300  | -0.99935300 |

cyclooctene – methylperoxyl fragmentation TS

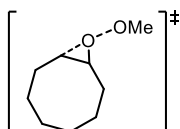

TS freq.: -657.43 cm<sup>-1</sup>  
CBS-QB3 Enthalpy= -502.529287 CBS-QB3 Free Energy= -502.582202

|     |            |             |             |
|-----|------------|-------------|-------------|
| 0 2 |            |             |             |
| C   | 2.43383400 | -1.45170700 | -0.18375000 |
| C   | 0.91002800 | -1.74999000 | -0.24985600 |
| C   | 1.20887800 | 1.95104000  | -0.02747700 |

|   |             |             |             |
|---|-------------|-------------|-------------|
| C | 0.11873500  | -1.05255900 | 0.80125800  |
| C | -0.05626500 | 1.19510800  | -0.45963000 |
| C | -0.58747800 | 0.23783000  | 0.59857600  |
| H | 2.80414600  | -1.70153700 | 0.81774500  |
| H | 0.53759900  | -1.48041800 | -1.24175800 |
| H | 0.95271500  | 2.64986200  | 0.77785000  |
| H | -0.85536300 | 1.90579800  | -0.68298600 |
| H | 2.92781100  | -2.14458100 | -0.87374500 |
| H | 0.77403900  | -2.83100900 | -0.14289300 |
| H | 1.53986100  | 2.57175900  | -0.86792800 |
| H | -0.02409300 | -1.54089700 | 1.75867100  |
| H | 0.12007100  | 0.63983700  | -1.38502800 |
| C | 2.86238100  | -0.01685300 | -0.53469600 |
| H | 3.95650500  | -0.01255100 | -0.57191600 |
| H | 2.53286600  | 0.22289300  | -1.55283500 |
| C | 2.39415500  | 1.08617200  | 0.44542700  |
| H | 3.23035300  | 1.76389100  | 0.64503500  |
| H | 2.15625500  | 0.62870000  | 1.41319300  |
| H | -0.77970200 | 0.76520200  | 1.54283800  |
| O | -1.70044700 | -0.52227700 | 0.20392900  |
| O | -3.03890200 | 0.57915600  | -0.01164000 |
| C | -4.08222000 | -0.27530100 | -0.35822900 |
| H | -4.95620600 | 0.37571000  | -0.50527900 |
| H | -3.89424800 | -0.81552700 | -1.29608700 |
| H | -4.32009900 | -0.99460400 | 0.43707700  |

cyclooctene oxide

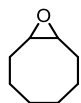

CBS-QB3 Enthalpy= -387.710400 CBS-QB3 Free Energy= -387.752089

|     |             |             |             |
|-----|-------------|-------------|-------------|
| 0 1 |             |             |             |
| C   | -0.92281500 | 1.81369300  | 0.03200200  |
| C   | 0.54429100  | 1.61124900  | -0.38745000 |
| C   | -0.98836000 | -1.80670600 | -0.07975200 |
| C   | 1.32520800  | 0.67039500  | 0.50534400  |
| C   | 0.41273900  | -1.49220500 | -0.63371000 |
| C   | 1.28308600  | -0.79439200 | 0.38141400  |
| H   | -0.96762900 | 2.05343100  | 1.10254700  |
| H   | 0.59538700  | 1.25488800  | -1.41940500 |
| H   | -0.91275200 | -2.62049100 | 0.65126200  |
| H   | 0.89770800  | -2.42284600 | -0.94822200 |
| H   | -1.29777600 | 2.70290800  | -0.48615000 |
| H   | 1.05515200  | 2.58075000  | -0.37790800 |
| H   | -1.60353500 | -2.19590500 | -0.89889400 |
| H   | 0.34000800  | -0.87094200 | -1.52862600 |
| C   | -1.89550200 | 0.65312700  | -0.26001200 |
| H   | -2.90603500 | 1.03995300  | -0.09352000 |
| H   | -1.85083300 | 0.40319100  | -1.32755600 |
| C   | -1.72472900 | -0.63004500 | 0.58961500  |
| H   | -2.71610500 | -0.99636700 | 0.87515200  |
| H   | -1.22730900 | -0.37252400 | 1.53117200  |
| H   | 1.49304500  | -1.37315700 | 1.28263000  |
| H   | 1.56206800  | 1.07404600  | 1.49087300  |
| O   | 2.41688700  | -0.05095500 | -0.09225800 |

cyclooctene – methylperoxyl + oxygen adduct

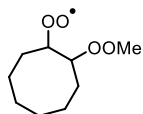

CBS-QB3 Enthalpy= -652.755274 CBS-QB3 Free Energy= -652.812472

|     |             |             |             |
|-----|-------------|-------------|-------------|
| 0 2 |             |             |             |
| C   | 2.35410400  | 1.06736100  | 0.51416900  |
| C   | 1.01506000  | 1.17526900  | 1.26820100  |
| C   | 1.28828100  | -2.20424700 | -0.37484700 |
| C   | -0.30746200 | 0.93881000  | 0.52660200  |
| C   | 0.08436100  | -1.60663900 | 0.37236600  |

|   |             |             |             |
|---|-------------|-------------|-------------|
| C | -0.49138000 | -0.34160800 | -0.29325800 |
| H | 2.26598900  | 1.55118100  | -0.46321300 |
| H | 1.03025300  | 0.51151800  | 2.13933500  |
| H | 0.92712900  | -2.69442700 | -1.28638400 |
| H | -0.71702800 | -2.34608100 | 0.41138300  |
| H | 3.06958700  | 1.67148900  | 1.08218000  |
| H | 0.93264800  | 2.18762600  | 1.67696000  |
| H | 1.71492000  | -2.99927400 | 0.24744500  |
| H | -1.12048300 | 0.99211100  | 1.25215800  |
| H | 0.35248400  | -1.40625200 | 1.41238100  |
| C | 2.98384600  | -0.33119200 | 0.34196800  |
| H | 4.04248300  | -0.16526900 | 0.11777100  |
| H | 2.96801500  | -0.86535800 | 1.30108400  |
| C | 2.40840100  | -1.22739700 | -0.77440200 |
| H | 3.22107700  | -1.83060900 | -1.19204300 |
| H | 2.07402700  | -0.58804200 | -1.59931400 |
| H | -0.02972200 | -0.18030100 | -1.27042100 |
| O | -1.85939200 | -0.49090000 | -0.67564700 |
| O | -0.60555300 | 2.11764700  | -0.32023800 |
| O | 0.09175500  | 2.15157800  | -1.43703000 |
| O | -2.63576100 | -0.73268900 | 0.54986600  |
| C | -3.96073600 | -0.36383900 | 0.21478600  |
| H | -4.33838300 | -0.96731900 | -0.61665000 |
| H | -4.54190400 | -0.57433900 | 1.11535900  |
| H | -4.02633900 | 0.69914700  | -0.03715700 |

cyclooctene – methylperoxy 1,4-HAT TS

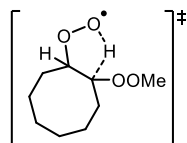

TS freq.: -2002.36 cm<sup>-1</sup>

CBS-QB3 Enthalpy= -652.714164 CBS-QB3 Free Energy= -652.769371

|     |             |             |             |
|-----|-------------|-------------|-------------|
| 0 2 |             |             |             |
| C   | 2.37158900  | -1.24918400 | -0.37970800 |
| C   | 1.07798400  | -1.36358800 | -1.20618000 |
| C   | 1.36392100  | 2.09357700  | 0.27309900  |
| C   | -0.27812600 | -1.05721200 | -0.54695200 |
| C   | 0.29365400  | 1.55605900  | -0.69402400 |
| C   | -0.57540700 | 0.42507000  | -0.16668000 |
| H   | 2.20199600  | -1.70190600 | 0.60115600  |
| H   | 1.16049100  | -0.78406300 | -2.13401700 |
| H   | 0.86283700  | 2.59133500  | 1.11047200  |
| H   | -0.37256800 | 2.38128800  | -0.96013200 |
| H   | 3.10709800  | -1.88591600 | -0.88391700 |
| H   | 0.99281100  | -2.40806800 | -1.52370300 |
| H   | 1.90933700  | 2.87726100  | -0.26599500 |
| H   | -1.07037200 | -1.40896300 | -1.21476900 |
| H   | 0.76969600  | 1.23900300  | -1.62709100 |
| C   | 3.02949600  | 0.13355600  | -0.19444900 |
| H   | 4.05483800  | -0.05798700 | 0.13798100  |
| H   | 3.12861300  | 0.63448100  | -1.16700900 |
| C   | 2.37204600  | 1.07722700  | 0.83353200  |
| H   | 3.15547200  | 1.65425300  | 1.33584000  |
| H   | 1.89923400  | 0.46965400  | 1.60828700  |
| H   | -0.35027000 | 0.09510100  | 1.10939600  |
| O   | -1.88194500 | 0.82537500  | -0.37495400 |
| O   | -0.48105300 | -1.79717300 | 0.66730500  |
| O   | -0.02324500 | -0.95873800 | 1.71614300  |
| O   | -2.80300900 | -0.17433600 | 0.15983400  |
| C   | -4.09591800 | 0.34840700  | -0.09325100 |
| H   | -4.76893500 | -0.40586700 | 0.31807700  |
| H   | -4.24473800 | 1.30138200  | 0.42268500  |
| H   | -4.27696100 | 0.46452300  | -1.16620400 |

cyclooctene – methylperoxy – hydroperoxy radical elimination TS

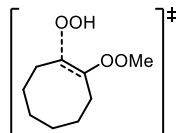

TS freq.: -454.13 cm<sup>-1</sup>

CBS-QB3 Enthalpy= -652.723262 CBS-QB3 Free Energy= -652.780235

| 0 2 |             |             |             |
|-----|-------------|-------------|-------------|
| C   | 2.45860400  | -1.18349100 | -0.52827600 |
| C   | 1.19576900  | -1.23294400 | -1.41461900 |
| C   | 1.19195200  | 2.00504100  | 0.52517700  |
| C   | -0.14998800 | -0.87168000 | -0.79946000 |
| C   | 0.36640700  | 1.66467100  | -0.73412300 |
| C   | -0.51459400 | 0.45915900  | -0.63280700 |
| H   | 2.28868400  | -1.82444500 | 0.33886100  |
| H   | 1.35466000  | -0.61365100 | -2.30773800 |
| H   | 0.51066000  | 2.30357800  | 1.32772800  |
| H   | -0.26171100 | 2.52373500  | -0.98954000 |
| H   | 3.26013700  | -1.64796000 | -1.11525800 |
| H   | 1.10896600  | -2.25911500 | -1.78208100 |
| H   | 1.79423400  | 2.88810200  | 0.27861300  |
| H   | -0.96642200 | -1.53473200 | -1.05005800 |
| H   | 1.04382500  | 1.51322200  | -1.58001200 |
| C   | 2.97352100  | 0.18169100  | -0.03493800 |
| H   | 3.96518600  | -0.00175200 | 0.39163100  |
| H   | 3.14804500  | 0.85162300  | -0.88787800 |
| C   | 2.10721600  | 0.88195700  | 1.03756900  |
| H   | 2.76310100  | 1.32439300  | 1.79460100  |
| H   | 1.50332700  | 0.13603600  | 1.55579700  |
| H   | -1.56030300 | -0.96789200 | 1.78199300  |
| O   | -1.77630900 | 0.85218800  | -0.26559200 |
| O   | -0.08351300 | -1.71897200 | 0.90608400  |
| O   | -0.60400400 | -0.89221300 | 1.92098000  |
| O   | -2.65991500 | -0.28792900 | -0.04063300 |
| C   | -3.97017200 | 0.21815700  | -0.25544000 |
| H   | -4.62098900 | -0.63254700 | -0.04459200 |
| H   | -4.19307200 | 1.03763900  | 0.43331500  |
| H   | -4.10068600 | 0.54380200  | -1.29058900 |

cyclooctene – 1-methylperoxyl

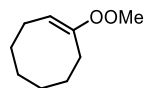

CBS-QB3 Enthalpy= -501.996150 CBS-QB3 Free Energy= -502.046656

| 0 1 |             |             |             |
|-----|-------------|-------------|-------------|
| C   | 2.24810700  | 1.48010500  | -0.30513300 |
| C   | 1.03769700  | 1.77338400  | 0.60916200  |
| C   | 1.13088500  | -1.91863400 | 0.11502400  |
| C   | -0.27532300 | 1.16678300  | 0.17010600  |
| C   | 0.23348900  | -1.12743400 | 1.09154500  |
| C   | -0.62204400 | -0.09855600 | 0.40849900  |
| H   | 1.98225100  | 1.73004900  | -1.33931000 |
| H   | 1.28928400  | 1.46264900  | 1.63053500  |
| H   | 0.50803900  | -2.61651600 | -0.45367100 |
| H   | -0.40671600 | -1.82492000 | 1.64007700  |
| H   | 3.05409000  | 2.16833200  | -0.02246600 |
| H   | 0.90879900  | 2.85938000  | 0.65625800  |
| H   | 1.81517800  | -2.53131400 | 0.71372000  |
| H   | -0.95131200 | 1.78557100  | -0.40537900 |
| H   | 0.85307800  | -0.61808400 | 1.83298400  |
| C   | 2.82163700  | 0.04917700  | -0.27011100 |
| H   | 3.76780400  | 0.07748800  | -0.82082100 |
| H   | 3.09486200  | -0.20885700 | 0.76165000  |
| C   | 1.94309100  | -1.07018300 | -0.87862400 |
| H   | 2.58606000  | -1.76145100 | -1.43363300 |
| H   | 1.26660500  | -0.63247500 | -1.61911700 |
| O   | -1.79303500 | -0.71188500 | -0.00173800 |
| O   | -2.61813100 | 0.17951600  | -0.79583200 |
| C   | -3.84739400 | 0.30024900  | -0.09526000 |
| H   | -4.46344000 | 0.93175600  | -0.73960100 |
| H   | -4.32718900 | -0.67476200 | 0.03096500  |

H -3.70892000 0.78275400 0.87712200

cyclooctene – hydroperoxyl ketone product

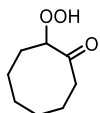

CBS-QB3 Enthalpy= -537.940934 CBS-QB3 Free Energy= -537.988988

0 1

|   |             |             |             |
|---|-------------|-------------|-------------|
| C | 0.26339400  | 1.94374900  | -0.08373600 |
| C | -0.57363700 | 1.31836200  | 1.04967900  |
| C | 2.19627300  | -1.06853000 | -0.03175500 |
| C | -1.22205100 | -0.07195300 | 0.84485000  |
| C | 1.04942500  | -1.32447000 | 0.97101500  |
| C | -0.30351200 | -1.16874800 | 0.30493200  |
| H | -0.25338100 | 1.80075100  | -1.03569500 |
| H | 0.02645400  | 1.29079600  | 1.96638000  |
| H | 2.29169500  | -1.94541000 | -0.67748000 |
| H | 1.11835200  | -2.35073500 | 1.34488500  |
| H | 0.26233500  | 3.02334400  | 0.10115200  |
| H | -1.41821500 | 1.97859400  | 1.26522600  |
| H | 3.12910800  | -0.99119300 | 0.53660100  |
| H | -1.54275000 | -0.42266000 | 1.83739900  |
| H | 1.13200600  | -0.65718300 | 1.83117800  |
| C | 1.74185100  | 1.51623500  | -0.22090900 |
| H | 2.23356500  | 2.30123300  | -0.80397700 |
| H | 2.22837400  | 1.53808700  | 0.76358300  |
| C | 2.02958300  | 0.17168800  | -0.92675000 |
| H | 2.95412300  | 0.26991000  | -1.50431800 |
| H | 1.24260400  | -0.01843200 | -1.66430100 |
| H | -1.97734300 | -0.61714200 | -1.56733400 |
| O | -0.63820300 | -1.87339600 | -0.62548600 |
| O | -2.45964400 | -0.03559400 | 0.14774500  |
| O | -2.21651300 | 0.27174600  | -1.25191600 |

cyclooctene – methoxy radical addition TS

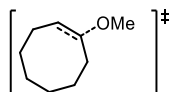

TS freq.: -255.16 cm<sup>-1</sup>  
CBS-QB3 Enthalpy= -427.448783 CBS-QB3 Free Energy= -427.498902

0 2

|   |             |             |             |
|---|-------------|-------------|-------------|
| C | -1.81540200 | 1.66016600  | -0.05320300 |
| C | -0.28264500 | 1.69597200  | -0.27135000 |
| C | -1.21398400 | -1.89092100 | -0.00196600 |
| C | 0.51848600  | 0.86454700  | 0.68938500  |
| C | 0.13639200  | -1.33026100 | -0.49681000 |
| C | 0.81806600  | -0.45727900 | 0.51656200  |
| H | -2.03600200 | 1.92965500  | 0.98687400  |
| H | -0.06185800 | 1.38763600  | -1.29846600 |
| H | -1.03125600 | -2.63360800 | 0.78389200  |
| H | 0.80111600  | -2.15706600 | -0.75522800 |
| H | -2.25166900 | 2.45289800  | -0.67169400 |
| H | 0.04318000  | 2.73751100  | -0.18621700 |
| H | -1.66946400 | -2.43901100 | -0.83512500 |
| H | 0.93076700  | 1.37412900  | 1.55653600  |
| H | -0.01400500 | -0.76254300 | -1.41812300 |
| C | -2.53405400 | 0.34028200  | -0.38984800 |
| H | -3.60854900 | 0.54614200  | -0.34307700 |
| H | -2.33306500 | 0.07146700  | -1.43437900 |
| C | -2.22519400 | -0.86131200 | 0.53454000  |
| H | -3.15583500 | -1.40140900 | 0.73770100  |
| H | -1.88485600 | -0.48512900 | 1.50531500  |
| H | 1.33447000  | -0.96876500 | 1.32412900  |
| O | 2.56481700  | -0.21752000 | -0.61090700 |
| C | 3.66437100  | 0.18311000  | 0.13653600  |
| H | 3.82254500  | -0.41568300 | 1.04869200  |
| H | 4.54731000  | 0.02843400  | -0.50492000 |

H 3.65240800 1.24967500 0.40826500

cyclooctene – methoxy adduct

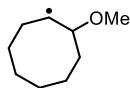

CBS-QB3 Enthalpy= -427.485208 CBS-QB3 Free Energy= -427.533611

|   |             |             |             |  |
|---|-------------|-------------|-------------|--|
| 0 | 2           |             |             |  |
| C | -1.80324300 | 1.64742100  | -0.10487100 |  |
| C | -0.25923200 | 1.69532000  | -0.24811200 |  |
| C | -1.06529600 | -1.88486200 | 0.07657700  |  |
| C | 0.47420400  | 0.81342600  | 0.70738700  |  |
| C | 0.21439100  | -1.35859700 | -0.58735700 |  |
| C | 1.11504000  | -0.47249200 | 0.28318800  |  |
| H | -2.07083000 | 1.96998200  | 0.90901600  |  |
| H | 0.01850300  | 1.44558800  | -1.27722600 |  |
| H | -0.79528200 | -2.55240000 | 0.90423900  |  |
| H | 0.82323100  | -2.20737900 | -0.91271900 |  |
| H | -2.22961500 | 2.39266600  | -0.78635500 |  |
| H | 0.04822500  | 2.73815500  | -0.09205100 |  |
| H | -1.57430700 | -2.51737500 | -0.66026800 |  |
| H | 0.50527400  | 1.10030600  | 1.75450700  |  |
| H | -0.03037400 | -0.80176800 | -1.49664400 |  |
| C | -2.46470800 | 0.28573300  | -0.37900600 |  |
| H | -3.54807300 | 0.43722700  | -0.33281600 |  |
| H | -2.25550300 | -0.02302200 | -1.41030600 |  |
| C | -2.07586800 | -0.84577800 | 0.60328700  |  |
| H | -2.97807900 | -1.39535600 | 0.89228900  |  |
| H | -1.69764000 | -0.39893400 | 1.52886500  |  |
| H | 1.42360900  | -1.03617600 | 1.17757400  |  |
| O | 2.28708200  | -0.24434300 | -0.53317500 |  |
| C | 3.37173000  | 0.34074400  | 0.16059300  |  |
| H | 3.68449700  | -0.27770000 | 1.01540700  |  |
| H | 4.19992800  | 0.40714400  | -0.54630100 |  |
| H | 3.13766700  | 1.34829500  | 0.52806600  |  |

cyclooctene – methoxy fragmentation TS

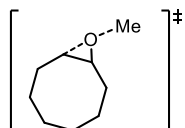

TS freq.: -809.50 cm<sup>-1</sup>  
CBS-QB3 Enthalpy= -427.412785 CBS-QB3 Free Energy= -427.462522

|   |             |             |             |  |
|---|-------------|-------------|-------------|--|
| 0 | 2           |             |             |  |
| C | 2.01451400  | -1.44163600 | -0.14189700 |  |
| C | 0.50151600  | -1.73083000 | -0.29980300 |  |
| C | 0.82137400  | 1.97424800  | -0.00651500 |  |
| C | -0.36013800 | -1.06315700 | 0.72422600  |  |
| C | -0.43640800 | 1.22623200  | -0.47888500 |  |
| C | -0.98101000 | 0.25542800  | 0.55472600  |  |
| H | 2.32679900  | -1.69768300 | 0.87819700  |  |
| H | 0.17962000  | -1.43736500 | -1.30252600 |  |
| H | 0.54545700  | 2.67408600  | 0.79156100  |  |
| H | -1.21811700 | 1.95533900  | -0.71682800 |  |
| H | 2.55075600  | -2.13113600 | -0.80399900 |  |
| H | 0.35090800  | -2.81342000 | -0.23402700 |  |
| H | 1.18347600  | 2.59315900  | -0.83549900 |  |
| H | -0.49862500 | -1.55308300 | 1.68024200  |  |
| H | -0.23700100 | 0.68332500  | -1.40619800 |  |
| C | 2.47629700  | -0.00801300 | -0.46069300 |  |
| H | 3.57101900  | -0.01606100 | -0.44861400 |  |
| H | 2.19676100  | 0.24302500  | -1.49140500 |  |
| C | 1.98187500  | 1.09761300  | 0.50386700  |  |
| H | 2.81565200  | 1.76992300  | 0.73072700  |  |
| H | 1.70649900  | 0.64141000  | 1.46121300  |  |
| H | -1.23485700 | 0.76879200  | 1.49211600  |  |
| O | -1.99159100 | -0.63927700 | 0.12378100  |  |
| C | -3.76400900 | 0.15363800  | -0.33614900 |  |



|   |             |             |             |
|---|-------------|-------------|-------------|
| H | -4.28956300 | -0.78423300 | -0.44639900 |
| H | -3.98321000 | 0.73259200  | 0.55235000  |
| H | -3.55690700 | 0.70440100  | -1.24442100 |

cyclooctene – methoxy + oxygen adduct

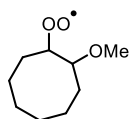

CBS-QB3 Enthalpy= -577.695681 CBS-QB3 Free Energy= -577.748727

|   |             |             |             |  |
|---|-------------|-------------|-------------|--|
| 0 | 2           |             |             |  |
| C | 1.85644800  | -1.43644100 | -0.16121100 |  |
| C | 0.70278700  | -1.33673400 | -1.17557400 |  |
| C | 1.35568900  | 2.05078600  | 0.26912600  |  |
| C | -0.65889400 | -0.76141200 | -0.75573100 |  |
| C | 0.25255700  | 1.64627500  | -0.72180900 |  |
| C | -0.77340100 | 0.65235700  | -0.14961100 |  |
| H | 1.47527300  | -1.81543300 | 0.79156900  |  |
| H | 1.03655000  | -0.78387000 | -2.06001000 |  |
| H | 0.91534100  | 2.70312300  | 1.03236400  |  |
| H | -0.31115200 | 2.53641900  | -1.00731200 |  |
| H | 2.52760200  | -2.21253300 | -0.54503500 |  |
| H | 0.47897000  | -2.34720900 | -1.53340400 |  |
| H | 2.08715000  | 2.66526800  | -0.26854400 |  |
| H | -1.31184300 | -0.78111500 | -1.63273000 |  |
| H | 0.69737900  | 1.26318100  | -1.64347100 |  |
| C | 2.71488000  | -0.18177800 | 0.09400900  |  |
| H | 3.63273400  | -0.53037000 | 0.57843600  |  |
| H | 3.03462000  | 0.25029900  | -0.86342500 |  |
| C | 2.09623200  | 0.91106400  | 0.98904000  |  |
| H | 2.89328600  | 1.37332800  | 1.58055500  |  |
| H | 1.43303800  | 0.43397000  | 1.71902700  |  |
| H | -0.64147800 | 0.55970500  | 0.93515100  |  |
| O | -2.06660600 | 1.19659700  | -0.41284500 |  |
| C | -3.12805700 | 0.68923000  | 0.38324000  |  |
| H | -2.87225500 | 0.71463900  | 1.45087400  |  |
| H | -3.98556600 | 1.33893600  | 0.20466200  |  |
| H | -3.39641400 | -0.33940000 | 0.11765900  |  |
| O | -1.33426200 | -1.74893600 | 0.12043400  |  |
| O | -0.87446700 | -1.75129000 | 1.35675600  |  |

cyclooctene – methoxy 1,4-HAT TS

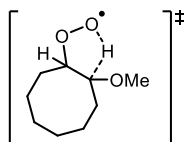

TS freq.: -1844.66 cm<sup>-1</sup>  
CBS-QB3 Enthalpy= -577.660040 CBS-QB3 Free Energy= -577.710742

|   |             |             |             |  |
|---|-------------|-------------|-------------|--|
| 0 | 2           |             |             |  |
| C | 1.90360000  | -1.42214300 | -0.21081700 |  |
| C | 0.69066300  | -1.43501900 | -1.15961100 |  |
| C | 1.22117000  | 2.04055500  | 0.21241600  |  |
| C | -0.68039100 | -0.95297900 | -0.66015700 |  |
| C | 0.16583500  | 1.56194700  | -0.80252700 |  |
| C | -0.83620600 | 0.55077300  | -0.27865300 |  |
| H | 1.59315800  | -1.80476400 | 0.76514900  |  |
| H | 0.92896200  | -0.90880800 | -2.09193800 |  |
| H | 0.72229900  | 2.64083000  | 0.98135800  |  |
| H | -0.40775700 | 2.42600000  | -1.14547300 |  |
| H | 2.60741400  | -2.15781000 | -0.61575100 |  |
| H | 0.51964900  | -2.47706400 | -1.44967000 |  |
| H | 1.89383900  | 2.72364400  | -0.31932400 |  |
| H | -1.41856800 | -1.20104100 | -1.43302600 |  |
| H | 0.67403100  | 1.15812800  | -1.68367300 |  |
| C | 2.69227700  | -0.11045100 | -0.01717300 |  |
| H | 3.65555500  | -0.39526200 | 0.41819500  |  |
| H | 2.93351400  | 0.32826800  | -0.99474800 |  |

|   |             |             |             |
|---|-------------|-------------|-------------|
| C | 2.05800200  | 0.95184800  | 0.90472200  |
| H | 2.85564100  | 1.46524500  | 1.45170000  |
| H | 1.45873900  | 0.44074500  | 1.66283100  |
| H | -0.66470700 | 0.18508300  | 0.98383200  |
| O | -2.10913800 | 1.06179300  | -0.42634900 |
| C | -3.20527100 | 0.35316700  | 0.16334400  |
| H | -3.02960000 | 0.20793700  | 1.23254700  |
| H | -4.08044000 | 0.98018600  | 0.00141700  |
| H | -3.35441200 | -0.62451500 | -0.30073800 |
| O | -1.12858700 | -1.66263700 | 0.50810200  |
| O | -0.63044800 | -0.92578000 | 1.62175200  |

cyclooctene – methoxy – hydroperoxyl

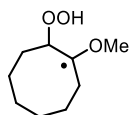

CBS-QB3 Enthalpy= -577.684961 CBS-QB3 Free Energy= -577.738078

|     |             |             |             |
|-----|-------------|-------------|-------------|
| 0 2 |             |             |             |
| C   | 1.93339300  | -1.36703000 | -0.20129500 |
| C   | 0.75108500  | -1.43123000 | -1.18834400 |
| C   | 1.10685700  | 2.09294500  | 0.22090800  |
| C   | -0.64040600 | -0.93978000 | -0.74622000 |
| C   | 0.18014600  | 1.59038900  | -0.91278300 |
| C   | -0.79690200 | 0.53439900  | -0.52794600 |
| H   | 1.61843600  | -1.79556500 | 0.75336200  |
| H   | 1.01294800  | -0.92395900 | -2.12506300 |
| H   | 0.50576300  | 2.65179800  | 0.94537900  |
| H   | -0.37827800 | 2.45062800  | -1.30214600 |
| H   | 2.69238300  | -2.04782300 | -0.60389000 |
| H   | 0.60775400  | -2.48366600 | -1.45204500 |
| H   | 1.81016100  | 2.81046700  | -0.21928400 |
| H   | -1.34437300 | -1.28330200 | -1.52466600 |
| H   | 0.79653900  | 1.22302500  | -1.73736100 |
| C   | 2.63564000  | -0.01834700 | 0.06086900  |
| H   | 3.58509100  | -0.26090600 | 0.54928900  |
| H   | 2.91308700  | 0.45080400  | -0.89257600 |
| C   | 1.88462200  | 0.99209900  | 0.95725000  |
| H   | 2.60437800  | 1.48707300  | 1.61758000  |
| H   | 1.20603800  | 0.43738500  | 1.60984500  |
| H   | -1.17562200 | -0.43834800 | 1.77386900  |
| O   | -1.84568300 | 0.96640900  | 0.25603500  |
| C   | -3.17051100 | 0.55637700  | -0.12660000 |
| H   | -3.28861000 | -0.52636500 | -0.04502800 |
| H   | -3.85042800 | 1.05356800  | 0.56435700  |
| H   | -3.38879600 | 0.88354800  | -1.14806900 |
| O   | -1.17546500 | -1.70307100 | 0.36690700  |
| O   | -0.63260300 | -1.23174900 | 1.62973500  |

cyclooctene – methoxy – hydroperoxyl radical elimination TS

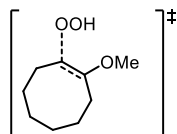

TS freq.: -390.98 cm<sup>-1</sup>  
CBS-QB3 Enthalpy= -577.664259 CBS-QB3 Free Energy= -577.717892

|     |             |             |             |
|-----|-------------|-------------|-------------|
| 0 2 |             |             |             |
| C   | 1.92052000  | -1.29176200 | -0.57299800 |
| C   | 0.68131500  | -1.17714700 | -1.48597400 |
| C   | 1.05778700  | 1.97124600  | 0.57102100  |
| C   | -0.63540800 | -0.71490800 | -0.88569200 |
| C   | 0.15975300  | 1.72283100  | -0.65881200 |
| C   | -0.85822300 | 0.62788500  | -0.56816800 |
| H   | 1.64343400  | -1.89668800 | 0.29392500  |
| H   | 0.92227100  | -0.54064600 | -2.34931000 |
| H   | 0.43479800  | 2.30480700  | 1.40762500  |
| H   | -0.38898100 | 2.64340200  | -0.87772500 |

|   |             |             |             |
|---|-------------|-------------|-------------|
| H | 2.65475300  | -1.87761700 | -1.13833600 |
| H | 0.50203400  | -2.17432000 | -1.89582100 |
| H | 1.70823500  | 2.81647600  | 0.31545800  |
| H | -1.49707600 | -1.26123000 | -1.25378000 |
| H | 0.80069000  | 1.52545000  | -1.52325400 |
| C | 2.63246000  | -0.01215300 | -0.08959300 |
| H | 3.60475700  | -0.33463300 | 0.29742900  |
| H | 2.86443400  | 0.63828200  | -0.94383100 |
| C | 1.91964900  | 0.78187900  | 1.02679900  |
| H | 2.67255600  | 1.17795700  | 1.71675600  |
| H | 1.30531500  | 0.09042800  | 1.60535500  |
| H | -1.31943600 | -0.79864500 | 2.21269200  |
| O | -2.05847600 | 1.09110800  | -0.13422000 |
| C | -3.19881200 | 0.22617900  | -0.14605800 |
| H | -2.98404800 | -0.71773600 | 0.35944600  |
| H | -3.98688400 | 0.77205900  | 0.36976000  |
| H | -3.51540500 | 0.02378000  | -1.17473100 |
| O | -0.88182500 | -1.79500400 | 0.67006700  |
| O | -0.49666000 | -1.19553200 | 1.89355300  |

cyclooctene – 2-methoxy

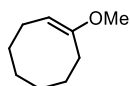

CBS-QB3 Enthalpy= -426.941273 CBS-QB3 Free Energy= -426.987321

|     |             |             |             |
|-----|-------------|-------------|-------------|
| 0 1 |             |             |             |
| C   | -1.97306600 | -1.33928400 | -0.32091100 |
| C   | -0.79778100 | -1.74675600 | 0.59582600  |
| C   | -0.56080800 | 1.93631900  | 0.13418500  |
| C   | 0.56922800  | -1.25674000 | 0.17205100  |
| C   | 0.24648600  | 1.05128700  | 1.10816300  |
| C   | 1.03352900  | -0.02293500 | 0.41399600  |
| H   | -1.72489300 | -1.60337600 | -1.35626700 |
| H   | -1.02566800 | -1.42472500 | 1.61893700  |
| H   | 0.13247500  | 2.57408300  | -0.42408600 |
| H   | 0.93933200  | 1.67945000  | 1.67502300  |
| H   | -2.83764200 | -1.95695200 | -0.04818200 |
| H   | -0.76857400 | -2.84051600 | 0.63341500  |
| H   | -1.18699000 | 2.60923800  | 0.73182500  |
| H   | 1.17684300  | -1.95978200 | -0.38567600 |
| H   | -0.43246600 | 0.59103100  | 1.82913800  |
| C   | -2.42146300 | 0.13546700  | -0.27791400 |
| H   | -3.36289200 | 0.19247000  | -0.83470700 |
| H   | -2.67794800 | 0.40867000  | 0.75404900  |
| C   | -1.44583100 | 1.17932500  | -0.87171600 |
| H   | -2.02355900 | 1.93218700  | -1.41849400 |
| H   | -0.81184300 | 0.69040800  | -1.61817800 |
| O   | 2.25027800  | 0.46356000  | 0.01326100  |
| C   | 3.11051700  | -0.39897500 | -0.71328200 |
| H   | 2.65356500  | -0.71732500 | -1.65749900 |
| H   | 4.01097100  | 0.17742900  | -0.92140800 |
| H   | 3.37221000  | -1.28701300 | -0.12635600 |

cyclooctene – 2-methoxy 1-hydroperoxyl ether fragmentation TS

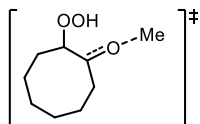

TS freq.: -663.07 cm<sup>-1</sup>  
CBS-QB3 Enthalpy= -577.647776 CBS-QB3 Free Energy= -577.702465

|     |             |             |             |
|-----|-------------|-------------|-------------|
| 0 2 |             |             |             |
| C   | -1.16078900 | -1.77303500 | -0.67793400 |
| C   | -0.34942300 | -1.93611300 | 0.61985100  |
| C   | -1.73567900 | 1.56748500  | 0.42758200  |
| C   | 0.83693800  | -0.98840200 | 0.90998700  |
| C   | -0.71250800 | 1.03028100  | 1.46119400  |
| C   | 0.57917600  | 0.51413800  | 0.88497600  |
| H   | -0.48211200 | -1.56421000 | -1.50910000 |

|   |             |             |             |
|---|-------------|-------------|-------------|
| H | -1.03290500 | -1.90782700 | 1.47686400  |
| H | -1.44323600 | 2.58007900  | 0.13330500  |
| H | -0.47566200 | 1.83991800  | 2.16105100  |
| H | -1.60479800 | -2.75202400 | -0.88905100 |
| H | 0.09585000  | -2.93548400 | 0.63033400  |
| H | -2.69886300 | 1.67303700  | 0.93969000  |
| H | 1.15115300  | -1.22006200 | 1.94198300  |
| H | -1.18190200 | 0.23559200  | 2.04692300  |
| C | -2.31434800 | -0.74908100 | -0.67711200 |
| H | -2.97009800 | -1.01679000 | -1.51207700 |
| H | -2.92498900 | -0.87836800 | 0.22657600  |
| C | -1.93078000 | 0.73568100  | -0.84965500 |
| H | -2.71473500 | 1.23349300  | -1.43044500 |
| H | -1.02877400 | 0.79059700  | -1.46741300 |
| H | 2.33458000  | -0.04983700 | -1.08857000 |
| O | 1.49152000  | 1.30624700  | 0.47251200  |
| C | 1.35128500  | 2.32777600  | -1.08199500 |
| H | 1.08191700  | 1.63598800  | -1.87160900 |
| H | 0.60024500  | 3.06266600  | -0.82608600 |
| H | 2.36792300  | 2.69782600  | -1.10465300 |
| O | 2.02253200  | -1.35540300 | 0.20965500  |
| O | 1.92884500  | -0.92546600 | -1.17705300 |

### cyclooctene –methoxy H-abstraction TS

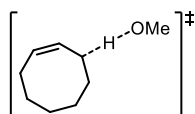

TS freq.: -1163.57 cm<sup>-1</sup>

CBS-QB3 Enthalpy= -427.444131 CBS-QB3 Free Energy= -427.495404

|     |             |             |             |
|-----|-------------|-------------|-------------|
| 0 2 |             |             |             |
| C   | 1.76488500  | -1.32787100 | -0.65505500 |
| C   | 0.49161600  | -1.75610100 | 0.10909300  |
| C   | 0.46771200  | 1.92913900  | 0.12371400  |
| C   | 0.32414400  | -1.15901900 | 1.48408900  |
| C   | -0.61872600 | 1.07753400  | 0.79969500  |
| C   | -0.19657300 | 0.04166600  | 1.77464100  |
| H   | 2.64269800  | -1.43895300 | -0.00650800 |
| H   | -0.37467500 | -1.50562500 | -0.50938800 |
| H   | 0.69137500  | 2.76598100  | 0.80076800  |
| H   | -1.38411800 | 1.73457200  | 1.22340800  |
| H   | 1.90373900  | -2.03550300 | -1.48025400 |
| H   | 0.50766400  | -2.84549400 | 0.21314900  |
| H   | 0.03018600  | 2.38430700  | -0.77254600 |
| H   | 0.63082100  | -1.78446700 | 2.31981300  |
| H   | -1.23505400 | 0.55174100  | -0.13270000 |
| C   | 1.74436700  | 0.09015000  | -1.24972800 |
| H   | 2.61325700  | 0.17105900  | -1.91165000 |
| H   | 0.86416800  | 0.19820100  | -1.89391600 |
| C   | 1.79988300  | 1.25727800  | -0.23835700 |
| H   | 2.43536200  | 2.04702200  | -0.65308400 |
| H   | 2.30070200  | 0.92212300  | 0.67614800  |
| H   | -0.32672000 | 0.29513100  | 2.82632900  |
| O   | -2.00542600 | 0.11847000  | -1.11627600 |
| C   | -3.20821600 | -0.32442600 | -0.55753200 |
| H   | -3.81448800 | -0.70485900 | -1.39193100 |
| H   | -3.07433900 | -1.15281500 | 0.15328700  |
| H   | -3.78172700 | 0.47972100  | -0.07409000 |

### cyclooctenyl radical

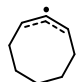

CBS-QB3 Enthalpy= -311.941985 CBS-QB3 Free Energy= -311.983669

|     |             |             |             |
|-----|-------------|-------------|-------------|
| 0 2 |             |             |             |
| C   | -1.17404000 | -1.31626400 | -0.33611500 |
| C   | 0.07041500  | -1.61915200 | 0.54879100  |
| C   | 0.07043100  | 1.61915500  | 0.54878700  |
| C   | 1.39888900  | -1.26071500 | -0.05852600 |

|   |             |             |             |
|---|-------------|-------------|-------------|
| C | 1.39890000  | 1.26070000  | -0.05852400 |
| C | 1.92128600  | -0.00000900 | -0.31112200 |
| H | -0.88284000 | -1.35199600 | -1.39160800 |
| H | -0.05907900 | -1.12958900 | 1.52136900  |
| H | 0.08545700  | 2.69145500  | 0.76047200  |
| H | 2.01570800  | 2.09998000  | -0.36640000 |
| H | -1.89596200 | -2.12714600 | -0.19199700 |
| H | 0.08542800  | -2.69145100 | 0.76048600  |
| H | -0.05906400 | 1.12960200  | 1.52137100  |
| H | 2.01569300  | -2.10000200 | -0.36638700 |
| C | -1.90747200 | 0.00000700  | -0.04126400 |
| H | -2.83630800 | 0.00001500  | -0.62388400 |
| H | -2.21625700 | 0.00000700  | 1.01284400  |
| C | -1.17402700 | 1.31627200  | -0.33611200 |
| H | -1.89594400 | 2.12715800  | -0.19198800 |
| H | -0.88283500 | 1.35200600  | -1.39160800 |
| H | 2.89972100  | -0.00000900 | -0.78816200 |

cyclooctene peroxy radical

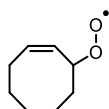

CBS-QB3 Enthalpy= -462.138008 CBS-QB3 Free Energy= -462.184543

|     |             |             |             |
|-----|-------------|-------------|-------------|
| 0 2 |             |             |             |
| C   | 2.45726200  | -0.36758900 | -0.29088800 |
| C   | -1.08875100 | 0.37117600  | 0.59308200  |
| C   | 1.33889500  | -1.33564500 | -0.75338300 |
| C   | -0.61332500 | -1.02517100 | 0.88521300  |
| C   | 0.37471300  | -1.73657500 | 0.33678600  |
| H   | 0.79678600  | -0.89752000 | -1.59148300 |
| H   | 3.19104400  | -0.93132700 | 0.29593100  |
| H   | -1.14094200 | 0.93083700  | 1.53405600  |
| H   | 1.81261300  | -2.23851600 | -1.14842200 |
| H   | -1.19459600 | -1.50142900 | 1.67155800  |
| H   | 0.52499700  | -2.73202200 | 0.74899000  |
| C   | -0.40546200 | 1.22423100  | -0.47499100 |
| H   | -1.06922100 | 2.07445800  | -0.66058400 |
| O   | -2.54624000 | 0.29436100  | 0.26131000  |
| O   | -2.76851300 | -0.36303400 | -0.85652400 |
| C   | 0.97965900  | 1.78529000  | -0.08858700 |
| H   | 1.41836500  | 2.23226200  | -0.98826400 |
| H   | 0.82594400  | 2.61519200  | 0.61099900  |
| C   | 1.99886300  | 0.82862300  | 0.55314900  |
| H   | 2.88621100  | 1.41695500  | 0.81161300  |
| H   | 1.60212400  | 0.46132000  | 1.50475300  |
| H   | -0.37392100 | 0.66424900  | -1.40796800 |
| H   | 2.98750000  | -0.01111400 | -1.18176400 |

cyclooctene peroxy radical 1,6-HAT TS

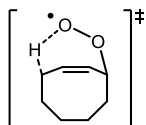

TS freq.: -1775.98 cm<sup>-1</sup>

CBS-QB3 Enthalpy= -462.099973 CBS-QB3 Free Energy= -462.144159

|     |             |             |             |
|-----|-------------|-------------|-------------|
| 0 2 |             |             |             |
| C   | 1.47823500  | -0.98785300 | -0.78668500 |
| C   | -1.08261000 | 0.92173200  | 0.49569200  |
| C   | 0.27901900  | -1.70269900 | -0.12816000 |
| C   | -0.67840600 | -0.11506700 | 1.52031200  |
| C   | -0.15639100 | -1.32030900 | 1.21441400  |
| H   | -0.77195200 | -1.23968500 | -0.84427800 |
| H   | 2.23816400  | -1.75603400 | -0.96851000 |
| H   | -1.68152100 | 1.67630100  | 1.00882000  |
| H   | 0.30035400  | -2.78065400 | -0.28621800 |
| H   | -1.00890200 | 0.06401200  | 2.53849700  |
| H   | -0.13511300 | -2.07881800 | 1.99502000  |

|   |             |             |             |
|---|-------------|-------------|-------------|
| C | -0.01212300 | 1.61631500  | -0.37086000 |
| H | -0.27903600 | 2.67399500  | -0.44724600 |
| O | -2.11180800 | 0.26363200  | -0.32780100 |
| O | -1.54657500 | -0.47589100 | -1.37072900 |
| C | 1.44682000  | 1.52108400  | 0.09917200  |
| H | 2.01265500  | 2.21678200  | -0.52859600 |
| H | 1.53160100  | 1.91283000  | 1.11853500  |
| C | 2.14471000  | 0.13056500  | 0.03734700  |
| H | 3.14605000  | 0.28062800  | -0.37809300 |
| H | 2.29847900  | -0.24487400 | 1.05186500  |
| H | -0.09938800 | 1.20999900  | -1.37864500 |
| H | 1.20014700  | -0.61902300 | -1.78030300 |

cyclooctenyl radical - hydroperoxyl

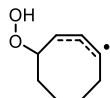

CBS-QB3 Enthalpy= -462.138230 CBS-QB3 Free Energy= -462.186271

|     |             |             |             |
|-----|-------------|-------------|-------------|
| 0 2 |             |             |             |
| C   | -1.01556700 | -1.38960900 | -0.74676100 |
| C   | -2.28475700 | -0.81413800 | -0.09505000 |
| C   | 0.98815700  | 0.71196300  | 0.45124700  |
| C   | -2.38618000 | 0.67922500  | 0.02740400  |
| C   | -0.03427300 | 1.70708700  | -0.01895800 |
| C   | -1.42494200 | 1.67809000  | -0.05327200 |
| H   | -0.64673100 | -0.69453400 | -1.50602800 |
| H   | -2.43888900 | -1.28226000 | 0.89105500  |
| H   | 3.10026900  | -0.92589700 | -0.71681600 |
| H   | -1.28290400 | -2.30973500 | -1.27618100 |
| H   | -3.15725200 | -1.12966500 | -0.68010000 |
| H   | 1.63438400  | 1.26191000  | 1.14984200  |
| H   | -3.40880300 | 1.04208500  | 0.09725400  |
| H   | 0.41787900  | 2.65991800  | -0.27749600 |
| H   | -1.85771600 | 2.67037500  | -0.17853200 |
| C   | 0.10241600  | -1.71838700 | 0.24572200  |
| H   | 0.97578400  | -2.07366600 | -0.31046500 |
| H   | -0.21408400 | -2.55631800 | 0.87850300  |
| C   | 0.52413200  | -0.56570300 | 1.16200900  |
| H   | -0.28828000 | -0.29591400 | 1.84484300  |
| H   | 1.34873700  | -0.91233000 | 1.79023900  |
| O   | 1.80068400  | 0.44365300  | -0.71277800 |
| O   | 3.07477600  | -0.09179500 | -0.22974200 |

cyclooctenyl radical - hydroperoxyl elimination TS

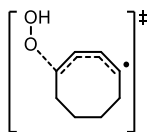

TS freq.: -450.11 cm<sup>-1</sup>  
CBS-QB3 Enthalpy= -462.103541 CBS-QB3 Free Energy= -462.151293

|     |             |             |             |
|-----|-------------|-------------|-------------|
| 0 2 |             |             |             |
| C   | 1.24284800  | 0.57098400  | 1.25190200  |
| C   | -0.86212600 | -0.48335000 | -0.98808100 |
| C   | 1.26729500  | 1.65459500  | 0.21702500  |
| C   | -0.62656000 | 0.86405500  | -1.24950900 |
| C   | 0.43742600  | 1.74535700  | -0.84980000 |
| H   | -3.63995200 | -0.30586400 | 0.47951300  |
| H   | 1.65385100  | 0.95297300  | 2.19129900  |
| H   | -1.74674600 | -0.86760100 | -1.48640300 |
| H   | 2.00076300  | 2.44755200  | 0.34193200  |
| H   | -1.40878700 | 1.35753000  | -1.82122500 |
| H   | 0.52163700  | 2.64392400  | -1.45785200 |
| C   | 0.13086000  | -1.58857200 | -0.67615800 |
| H   | 0.03127500  | -2.30623900 | -1.49942900 |
| O   | -1.81297100 | -0.55002900 | 0.78026400  |
| O   | -2.94511700 | 0.24873800  | 0.86591100  |
| C   | 1.62417100  | -1.25398400 | -0.52868800 |

|   |             |             |             |
|---|-------------|-------------|-------------|
| H | 2.18795700  | -2.17813500 | -0.69497900 |
| H | 1.92353300  | -0.57097900 | -1.32899000 |
| C | 2.04250300  | -0.68091500 | 0.83111500  |
| H | 3.11255600  | -0.44557700 | 0.80020100  |
| H | 1.91420800  | -1.44589500 | 1.60552100  |
| H | -0.22956700 | -2.12290800 | 0.21199100  |
| H | 0.20547000  | 0.28252800  | 1.44219500  |

cyclooctadiene

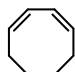

CBS-QB3 Enthalpy= -311.376902 CBS-QB3 Free Energy= -311.416403

|     |             |             |             |
|-----|-------------|-------------|-------------|
| 0 1 |             |             |             |
| C   | -0.96326200 | -1.09393600 | 0.76546700  |
| C   | 1.33480000  | 1.16072000  | 0.35026400  |
| C   | 0.01896800  | -1.75460500 | -0.15902800 |
| C   | 1.84948800  | -0.04884600 | 0.07919100  |
| C   | 1.22656700  | -1.26236400 | -0.46507000 |
| H   | -1.60145300 | -1.84838500 | 1.23618100  |
| H   | 2.02862800  | 1.87157200  | 0.79769500  |
| H   | -0.28807000 | -2.68751900 | -0.62590100 |
| H   | 2.91202600  | -0.16400400 | 0.29080200  |
| H   | 1.86359600  | -1.84983600 | -1.12353000 |
| C   | -0.02028400 | 1.77698800  | 0.08858500  |
| H   | 0.17946200  | 2.72724400  | -0.42418500 |
| C   | -1.06615700 | 1.00484900  | -0.73270500 |
| H   | -1.78388200 | 1.72959800  | -1.13170900 |
| H   | -0.57908800 | 0.55124300  | -1.59998600 |
| C   | -1.85345300 | -0.06061000 | 0.04368400  |
| H   | -2.52473900 | -0.57859400 | -0.65085300 |
| H   | -2.49549800 | 0.42813000  | 0.78609600  |
| H   | -0.45492700 | 2.07766400  | 1.05362200  |
| H   | -0.41605700 | -0.59028600 | 1.56944500  |

norbornene

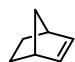

CBS-QB3 Enthalpy= -272.162362 CBS-QB3 Free Energy= -272.197150

|     |             |             |             |
|-----|-------------|-------------|-------------|
| 0 1 |             |             |             |
| C   | -0.22194600 | -1.27849300 | 0.78022100  |
| C   | -0.22194600 | 0.25070500  | 1.12789200  |
| C   | -0.22194600 | 0.25070500  | -1.12789200 |
| C   | -0.22194600 | -1.27849300 | -0.78022100 |
| H   | 0.64271200  | -1.79130500 | 1.20497700  |
| H   | -1.12069600 | -1.75888200 | 1.17650900  |
| H   | 0.64271200  | -1.79130500 | -1.20497700 |
| H   | -1.12069600 | -1.75888200 | -1.17650900 |
| C   | -1.13162800 | 0.79242000  | 0.00000000  |
| H   | -1.20463800 | 1.88166300  | 0.00000000  |
| H   | -2.13395500 | 0.35274400  | 0.00000000  |
| C   | 1.12576500  | 0.78896400  | 0.66854000  |
| C   | 1.12576500  | 0.78896400  | -0.66854000 |
| H   | -0.50825600 | 0.47852100  | 2.15451400  |
| H   | -0.50825600 | 0.47852100  | -2.15451400 |
| H   | 1.95918500  | 1.01014400  | 1.32406100  |
| H   | 1.95918500  | 1.01014400  | -1.32406100 |

norbornene – methylperoxyl radical addition TS – exo path

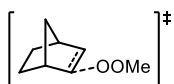

TS freq.: -435.89 cm<sup>-1</sup>  
CBS-QB3 Enthalpy= -462.107436 CBS-QB3 Free Energy= -462.154210

|   |   |             |             |             |
|---|---|-------------|-------------|-------------|
| 0 | 2 |             |             |             |
| C |   | -2.34942300 | -0.86969600 | -0.51464100 |
| C |   | -0.97821500 | -1.06085900 | 0.20846300  |
| C |   | -1.34080600 | 1.16632400  | 0.38566200  |
| C |   | -2.62161600 | 0.66121100  | -0.36703500 |
| H |   | -2.31302100 | -1.19327800 | -1.55709800 |
| H |   | -3.12200200 | -1.45999300 | -0.01586100 |
| H |   | -2.75960000 | 1.16309000  | -1.32653500 |
| H |   | -3.51184200 | 0.85276700  | 0.23886000  |
| C |   | -1.09817200 | -0.02179700 | 1.34730900  |
| H |   | -0.18068600 | 0.07362600  | 1.92655800  |
| H |   | -1.94523300 | -0.21104200 | 2.01248200  |
| C |   | 0.06999200  | -0.38485100 | -0.66106300 |
| C |   | -0.20409700 | 0.97598900  | -0.59043800 |
| H |   | -0.74197900 | -2.08558400 | 0.48916400  |
| H |   | -1.44181600 | 2.15809300  | 0.82578900  |
| H |   | 0.52096700  | -0.86788000 | -1.51758000 |
| H |   | 0.21071400  | 1.74612500  | -1.22801300 |
| O |   | 1.64100900  | -0.72941800 | 0.42218800  |
| O |   | 2.77259100  | -0.52736500 | -0.35014100 |
| C |   | 3.40041700  | 0.68734400  | 0.05148400  |
| H |   | 3.63963500  | 0.66159500  | 1.11783600  |
| H |   | 4.31625000  | 0.75144700  | -0.53997600 |
| H |   | 2.75133000  | 1.54329900  | -0.16044400 |

norbornene – methylperoxyl radical addition TS - endo path

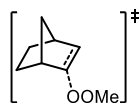

TS freq.: -465.71 cm<sup>-1</sup>

CBS-QB3 Enthalpy= -462.101139 CBS-QB3 Free Energy= -462.147775

|   |   |             |             |             |
|---|---|-------------|-------------|-------------|
| 0 | 2 |             |             |             |
| C |   | 1.25688500  | -1.39336900 | 0.39082900  |
| C |   | 1.19067600  | -0.61940600 | -0.96118300 |
| C |   | 1.64717600  | 1.01604200  | 0.53487400  |
| C |   | 1.51061400  | -0.26246500 | 1.43344400  |
| H |   | 0.34941600  | -1.95808200 | 0.58922500  |
| H |   | 2.09445800  | -2.09485500 | 0.35834900  |
| H |   | 0.69165200  | -0.16533900 | 2.14676800  |
| H |   | 2.43236800  | -0.42766800 | 1.99786600  |
| C |   | 2.32484900  | 0.41343300  | -0.72676500 |
| H |   | 2.43369500  | 1.13711700  | -1.53727700 |
| H |   | 3.29254300  | -0.05612500 | -0.52240300 |
| C |   | -0.03179400 | 0.30253500  | -0.93624400 |
| C |   | 0.29283400  | 1.32853600  | -0.05425900 |
| H |   | 1.26643300  | -1.25366200 | -1.84316200 |
| H |   | 2.14789100  | 1.85251100  | 1.02189900  |
| H |   | -0.71632900 | 0.39736100  | -1.76655300 |
| H |   | -0.32518500 | 2.18064200  | 0.19557100  |
| O |   | -1.40642400 | -0.73567200 | -0.02981000 |
| O |   | -2.64633600 | -0.32315400 | -0.49875500 |
| C |   | -3.31610800 | 0.40026700  | 0.53000300  |
| H |   | -2.78111200 | 1.32570500  | 0.76647900  |
| H |   | -4.30430400 | 0.63095300  | 0.12638900  |
| H |   | -3.41023900 | -0.21138400 | 1.43116900  |

norbornene – methylperoxyl adduct - exo path

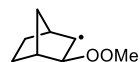

CBS-QB3 Enthalpy= -462.135565 CBS-QB3 Free Energy= -462.183750

|   |   |            |             |             |
|---|---|------------|-------------|-------------|
| 0 | 2 |            |             |             |
| C |   | 1.77858900 | 1.33980800  | -0.41760600 |
| C |   | 0.52094500 | 0.86021900  | 0.35058700  |
| C |   | 1.83402900 | -0.99084000 | 0.30187300  |
| C |   | 2.71545500 | 0.08855300  | -0.40781600 |
| H |   | 1.53627400 | 1.66995500  | -1.43153600 |
| H |   | 2.24244200 | 2.18601100  | 0.09405200  |
| H |   | 3.02132000 | -0.22240000 | -1.40863900 |



|   |             |             |             |
|---|-------------|-------------|-------------|
| H | 3.62350200  | 0.27149500  | 0.17470800  |
| C | 1.12806700  | -0.12075700 | 1.37552600  |
| H | 0.36966400  | -0.66699600 | 1.93800600  |
| H | 1.82746800  | 0.35464400  | 2.06871200  |
| C | -0.24671900 | -0.11034500 | -0.57987100 |
| C | 0.68279500  | -1.28922200 | -0.61068500 |
| H | -0.10997000 | 1.65735100  | 0.74009900  |
| H | 2.39272700  | -1.86007000 | 0.64972900  |
| H | -0.46375100 | 0.32583100  | -1.56357300 |
| H | 0.57630100  | -2.14353100 | -1.26541400 |
| O | -1.48671600 | -0.57078700 | -0.02485200 |
| O | -2.41731400 | 0.57081400  | -0.11878700 |
| C | -3.69486200 | 0.01277100  | 0.10193300  |
| H | -3.94582300 | -0.72742300 | -0.66555100 |
| H | -3.76467000 | -0.44542200 | 1.09464200  |
| H | -4.38304100 | 0.85922000  | 0.04023700  |

norbornene – methylperoxyl adduct - endo path

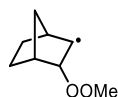

CBS-QB3 Enthalpy= -462.135161 CBS-QB3 Free Energy= -462.182782

|     |             |             |             |
|-----|-------------|-------------|-------------|
| 0 2 |             |             |             |
| C   | 1.01302900  | 1.45634500  | -0.26138000 |
| C   | 0.61312100  | 0.53216900  | 0.91253500  |
| C   | 2.07274300  | -0.74574300 | -0.27035200 |
| C   | 2.04560100  | 0.60295900  | -1.06429000 |
| H   | 0.14493700  | 1.73342300  | -0.85903900 |
| H   | 1.46719100  | 2.37478900  | 0.11794700  |
| H   | 1.75349500  | 0.45625000  | -2.10569100 |
| H   | 3.04038500  | 1.05963600  | -1.05809500 |
| C   | 1.92998800  | -0.22518600 | 1.18483200  |
| H   | 1.83126800  | -1.02967100 | 1.91828700  |
| H   | 2.74658900  | 0.43572700  | 1.48849300  |
| C   | -0.26307500 | -0.62571300 | 0.35239100  |
| C   | 0.73761000  | -1.39649000 | -0.45934500 |
| H   | 0.15682900  | 1.04657000  | 1.75723500  |
| H   | 2.93689200  | -1.37242900 | -0.49291200 |
| H   | -0.69532500 | -1.21454700 | 1.17632500  |
| H   | 0.47187500  | -2.12194800 | -1.21655600 |
| O   | -1.33312400 | -0.23119500 | -0.50462200 |
| O   | -2.34527400 | 0.40143600  | 0.35492000  |
| C   | -3.59225500 | -0.00679200 | -0.17184500 |
| H   | -3.72470000 | -1.09173500 | -0.10005100 |
| H   | -4.33474200 | 0.50019300  | 0.44936300  |
| H   | -3.70808100 | 0.31251900  | -1.21296300 |

norbornene – methylperoxyl fragmentation TS - exo path

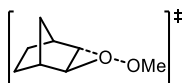

TS freq.: -628.93 cm<sup>-1</sup>  
CBS-QB3 Enthalpy= -462.116492 CBS-QB3 Free Energy= -462.163800

|     |             |             |             |
|-----|-------------|-------------|-------------|
| 0 2 |             |             |             |
| C   | 2.02121600  | 1.20185400  | -0.42059800 |
| C   | 0.60975400  | 1.00237100  | 0.18744700  |
| C   | 1.57865500  | -1.03684000 | 0.47501300  |
| C   | 2.71736800  | -0.17964200 | -0.18487100 |
| H   | 1.97685400  | 1.46517600  | -1.48117600 |
| H   | 2.55550400  | 2.00622300  | 0.08901400  |
| H   | 3.09887700  | -0.62749900 | -1.10476000 |
| H   | 3.55534300  | -0.09810900 | 0.51315000  |
| C   | 0.90056500  | 0.04086600  | 1.35803800  |
| H   | -0.00390400 | -0.31487800 | 1.84685600  |
| H   | 1.58644400  | 0.46056500  | 2.09782100  |
| C   | -0.15465800 | 0.07067300  | -0.77948800 |
| C   | 0.58284300  | -1.21143700 | -0.62553200 |
| H   | 0.06871900  | 1.91565700  | 0.42772100  |
| H   | 1.92610600  | -1.94627800 | 0.96335400  |

|   |             |             |             |
|---|-------------|-------------|-------------|
| H | -0.33359300 | 0.48007400  | -1.77894600 |
| H | 0.44887500  | -2.07339700 | -1.26261600 |
| O | -1.26335900 | -0.57030900 | -0.22936800 |
| O | -2.54010100 | 0.66443600  | -0.09195600 |
| C | -3.66597300 | -0.09176800 | 0.21598300  |
| H | -3.58286900 | -0.60542200 | 1.18385900  |
| H | -4.49314400 | 0.63061500  | 0.28637600  |
| H | -3.91414600 | -0.82221300 | -0.56601500 |

norbornene – methylperoxyl fragmentation TS - endo path

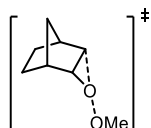

TS freq.: -597.57 cm<sup>-1</sup>

CBS-QB3 Enthalpy= -462.111495 CBS-QB3 Free Energy= -462.158393

|     |             |             |             |
|-----|-------------|-------------|-------------|
| 0 2 |             |             |             |
| C   | 0.74870800  | 1.50218600  | 0.06012400  |
| C   | 0.81527500  | 0.36935500  | 1.10473000  |
| C   | 1.93220900  | -0.52159600 | -0.66234300 |
| C   | 1.47972200  | 0.88818600  | -1.17384300 |
| H   | -0.28039700 | 1.77825500  | -0.15914300 |
| H   | 1.27619200  | 2.38395100  | 0.43296400  |
| H   | 0.82854100  | 0.80674400  | -2.04389800 |
| H   | 2.36233700  | 1.46689600  | -1.45929500 |
| C   | 2.22137500  | -0.21417700 | 0.83914700  |
| H   | 2.44692700  | -1.11112500 | 1.42249100  |
| H   | 3.02686300  | 0.51207200  | 0.97961300  |
| C   | -0.08966800 | -0.80938700 | 0.60834100  |
| C   | 0.73368900  | -1.39496100 | -0.48161000 |
| H   | 0.59831500  | 0.67864700  | 2.12645500  |
| H   | 2.73100800  | -0.96939600 | -1.25386900 |
| H   | -0.46373200 | -1.45719900 | 1.40920100  |
| H   | 0.47509800  | -2.28998400 | -1.02824400 |
| O   | -1.04390300 | -0.49861200 | -0.35019000 |
| O   | -2.41239300 | 0.32143000  | 0.51888000  |
| C   | -3.49273400 | 0.09154100  | -0.32465400 |
| H   | -3.72412700 | -0.97590100 | -0.44144200 |
| H   | -4.35275700 | 0.57777000  | 0.16152200  |
| H   | -3.36535700 | 0.54984900  | -1.31522100 |

norbornene oxide - exo path

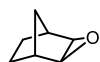

CBS-QB3 Enthalpy= -347.296262 CBS-QB3 Free Energy= -347.332367

|     |             |             |             |
|-----|-------------|-------------|-------------|
| 0 1 |             |             |             |
| C   | -1.29112700 | 0.87780500  | 0.78400600  |
| C   | 0.13846400  | 0.37723100  | 1.13740000  |
| C   | 0.13846400  | 0.37723100  | -1.13740000 |
| C   | -1.29112700 | 0.87780500  | -0.78400600 |
| H   | -2.06862400 | 0.23150300  | 1.20014300  |
| H   | -1.45715300 | 1.88153000  | 1.18220400  |
| H   | -2.06862400 | 0.23150300  | -1.20014300 |
| H   | -1.45715300 | 1.88153000  | -1.18220400 |
| C   | 0.96759600  | 1.01040000  | 0.00000000  |
| H   | 2.00876900  | 0.69548200  | 0.00000000  |
| H   | 0.91058100  | 2.10120600  | 0.00000000  |
| C   | 0.13846400  | -1.09963500 | 0.73423600  |
| C   | 0.13846400  | -1.09963500 | -0.73423600 |
| H   | 0.46093200  | 0.59234700  | 2.15654500  |
| H   | 0.46093200  | 0.59234700  | -2.15654500 |
| H   | -0.36545400 | -1.84996900 | 1.33533600  |
| H   | -0.36545400 | -1.84996900 | -1.33533600 |
| O   | 1.28825700  | -1.55434000 | 0.00000000  |

norbornene oxide - endo path

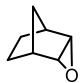

CBS-QB3 Enthalpy= -347.288241 CBS-QB3 Free Energy= -347.324203

| 0 1 |             |             |             |
|-----|-------------|-------------|-------------|
| C   | -1.07080600 | -0.88905000 | 0.78187800  |
| C   | -0.31965700 | 0.41864200  | 1.13324400  |
| C   | -0.31965600 | 0.41866500  | -1.13323500 |
| C   | -1.07080500 | -0.88903400 | -0.78189700 |
| H   | -0.57311400 | -1.76876700 | 1.18922000  |
| H   | -2.08662700 | -0.85293700 | 1.18382000  |
| H   | -0.57311300 | -1.76874400 | -1.18925600 |
| H   | -2.08662700 | -0.85291300 | -1.18383800 |
| C   | -0.80592000 | 1.36207000  | 0.00001300  |
| H   | -0.29285400 | 2.32798800  | 0.00002300  |
| H   | -1.88705300 | 1.53315400  | 0.00001500  |
| C   | 1.16629000  | 0.27432200  | 0.73505600  |
| C   | 1.16629000  | 0.27433600  | -0.73505100 |
| H   | -0.46760100 | 0.76699400  | 2.15593400  |
| H   | -0.46759900 | 0.76703700  | -2.15591900 |
| H   | 1.96094000  | 0.67977100  | 1.35314100  |
| H   | 1.96094000  | 0.67979700  | -1.35312500 |
| O   | 1.50478700  | -0.91638500 | -0.00000900 |

norbornene – methylperoxyl + oxygen adduct - exo path

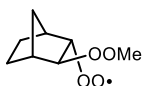

CBS-QB3 Enthalpy= -612.354261 CBS-QB3 Free Energy= -612.405322

| 0 2 |             |             |             |
|-----|-------------|-------------|-------------|
| C   | 2.03840300  | -0.53378400 | 1.29510000  |
| C   | 0.96897500  | -1.33238600 | 0.51124800  |
| C   | 1.65337300  | 0.23786000  | -0.98060100 |
| C   | 2.54221000  | 0.51680000  | 0.25458400  |
| H   | 1.62720100  | -0.06810800 | 2.19401300  |
| H   | 2.84509800  | -1.19700400 | 1.61457300  |
| H   | 2.45305900  | 1.54253300  | 0.61026500  |
| H   | 3.59005400  | 0.34595900  | -0.00277200 |
| C   | 1.52915500  | -1.30216400 | -0.92920300 |
| H   | 0.83291100  | -1.71582200 | -1.66025700 |
| H   | 2.49539900  | -1.80227100 | -1.02845100 |
| C   | -0.27295500 | -0.43456400 | 0.36225700  |
| C   | 0.20273900  | 0.63771700  | -0.65783100 |
| H   | 0.73353000  | -2.31063100 | 0.92936100  |
| H   | 2.02639600  | 0.66752800  | -1.91017700 |
| H   | -0.60059200 | 0.02816500  | 1.29805000  |
| H   | -0.45283400 | 0.64650800  | -1.52748100 |
| O   | -1.30047200 | -1.27319500 | -0.16658200 |
| O   | 0.18702000  | 1.99350600  | -0.10964300 |
| O   | -1.00680200 | 2.36109900  | 0.31167400  |
| O   | -2.42105500 | -0.45246300 | -0.59417400 |
| C   | -3.37863900 | -0.44124500 | 0.45410500  |
| H   | -4.20761000 | 0.14693100  | 0.05433900  |
| H   | -3.71826600 | -1.45455600 | 0.68716700  |
| H   | -2.99344500 | 0.04978000  | 1.35321100  |

norbornene – methylperoxyl + oxygen adduct - endo path

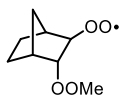

CBS-QB3 Enthalpy= -612.354714 CBS-QB3 Free Energy= -612.405882

| 0 2 |             |             |             |
|-----|-------------|-------------|-------------|
| C   | -1.77155600 | -1.66390600 | -0.04362500 |
| C   | -1.09630800 | -0.81157700 | 1.05569900  |
| C   | -1.75468300 | 0.74315500  | -0.46260100 |

|   |             |             |             |
|---|-------------|-------------|-------------|
| C | -2.17659500 | -0.59899400 | -1.11170700 |
| H | -1.10689900 | -2.42844400 | -0.44186100 |
| H | -2.65176400 | -2.16333900 | 0.36834800  |
| H | -1.68106000 | -0.76281200 | -2.07145500 |
| H | -3.25297700 | -0.60578700 | -1.29603100 |
| C | -1.97286400 | 0.46034500  | 1.04188700  |
| H | -1.60309100 | 1.26177200  | 1.68515300  |
| H | -3.01504900 | 0.25398900  | 1.29597800  |
| C | 0.23635900  | -0.24348000 | 0.51011200  |
| C | -0.22765800 | 0.82011400  | -0.52239900 |
| H | -0.98301000 | -1.31778000 | 2.01407400  |
| H | -2.24568200 | 1.62290500  | -0.87857700 |
| H | 0.81604500  | 0.24876500  | 1.29709900  |
| H | 0.21782600  | 0.66692000  | -1.50467600 |
| O | 0.98770700  | -1.31100100 | -0.05360300 |
| O | 0.13851000  | 2.18044200  | -0.09803900 |
| O | 1.42978300  | 2.32732800  | 0.11462200  |
| C | 3.26133500  | -0.93359500 | 0.21161000  |
| H | 3.12261800  | -0.35895600 | 1.13300700  |
| H | 3.41872600  | -1.99132600 | 0.44198000  |
| H | 4.12332800  | -0.53787300 | -0.32999000 |
| O | 2.17560100  | -0.76181900 | -0.68634200 |

norbornene – methylperoxyl 1,4-HAT TS - exo path

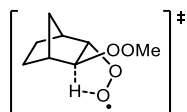

TS freq.: -1937.96 cm<sup>-1</sup>

CBS-QB3 Enthalpy= -612.309650 CBS-QB3 Free Energy= -612.359044

|     |             |             |             |
|-----|-------------|-------------|-------------|
| 0 2 |             |             |             |
| C   | 2.01948600  | -0.20006400 | 1.30852700  |
| C   | 0.94354100  | -1.16239000 | 0.74132500  |
| C   | 1.65401400  | 0.01070200  | -1.08982000 |
| C   | 2.55211800  | 0.55023800  | 0.04561100  |
| H   | 1.60345100  | 0.48282200  | 2.05100000  |
| H   | 2.80966300  | -0.77511900 | 1.79612600  |
| H   | 2.48557800  | 1.63145600  | 0.14466200  |
| H   | 3.59339700  | 0.28803200  | -0.15723500 |
| C   | 1.50459400  | -1.47378800 | -0.67547200 |
| H   | 0.80349500  | -2.04292900 | -1.28935100 |
| H   | 2.46396800  | -1.99713300 | -0.64578800 |
| C   | -0.27709300 | -0.34810100 | 0.33505100  |
| C   | 0.20461800  | 0.51269500  | -0.87332100 |
| H   | 0.70659800  | -2.01594000 | 1.37512800  |
| H   | 2.03655000  | 0.19367000  | -2.09385500 |
| H   | -0.65173600 | 0.76882700  | 0.95769900  |
| H   | -0.45091700 | 0.36817800  | -1.73423700 |
| O   | -1.36283400 | -1.18728600 | 0.17860800  |
| O   | 0.17453400  | 1.87385500  | -0.42652300 |
| O   | -0.81473300 | 1.95708200  | 0.59559900  |
| O   | -2.40422500 | -0.55640100 | -0.61839500 |
| C   | -3.43670000 | -0.14112300 | 0.27186000  |
| H   | -3.09964200 | 0.67617700  | 0.91346200  |
| H   | -4.22273700 | 0.21892000  | -0.39548700 |
| H   | -3.80706900 | -0.98397800 | 0.86099300  |

norbornene – methylperoxyl 1,4-HAT TS - endo path

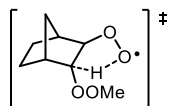

TS freq.: -1934.39 cm<sup>-1</sup>

CBS-QB3 Enthalpy= -612.315004 CBS-QB3 Free Energy= -612.364304

|     |             |             |             |
|-----|-------------|-------------|-------------|
| 0 2 |             |             |             |
| C   | -1.82655400 | -1.60975800 | 0.13165700  |
| C   | -1.05230100 | -0.66533900 | 1.09568000  |
| C   | -1.71478600 | 0.72850800  | -0.57117000 |
| C   | -2.28573000 | -0.64475700 | -1.00869400 |

|   |             |             |             |
|---|-------------|-------------|-------------|
| H | -1.20036100 | -2.42676000 | -0.22781200 |
| H | -2.68064900 | -2.04874100 | 0.65271500  |
| H | -1.91771800 | -0.95236900 | -1.99062300 |
| H | -3.37495300 | -0.59659000 | -1.07078500 |
| C | -1.86405400 | 0.64508400  | 0.96343500  |
| H | -1.42526000 | 1.49158600  | 1.48791300  |
| H | -2.90249200 | 0.51601000  | 1.27881000  |
| C | 0.23995100  | -0.25279100 | 0.40224700  |
| C | -0.18432900 | 0.65327900  | -0.79826500 |
| H | -0.90715100 | -1.06308400 | 2.09999600  |
| H | -2.16452800 | 1.58951500  | -1.06581700 |
| H | 0.75146700  | 0.84481400  | 0.97603100  |
| H | 0.07704400  | 0.25732200  | -1.78110400 |
| O | 1.10733700  | -1.29722900 | 0.22374500  |
| O | 0.56498400  | 1.85914400  | -0.67854200 |
| O | 0.79159700  | 2.07171000  | 0.71045600  |
| C | 3.30777400  | -0.54100400 | 0.13233800  |
| H | 3.09943700  | 0.35192000  | 0.72727500  |
| H | 3.61929100  | -1.37497000 | 0.76671400  |
| H | 4.08789600  | -0.31734000 | -0.59827300 |
| O | 2.18835100  | -0.90245400 | -0.67296000 |

norbornene – methylperoxyl – hydroperoxyl - exo path

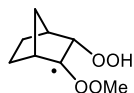

CBS-QB3 Enthalpy= -612.336427 CBS-QB3 Free Energy= -612.388819

|     |             |             |             |
|-----|-------------|-------------|-------------|
| 0 2 |             |             |             |
| C   | 1.84472500  | -1.06360300 | 1.22564000  |
| C   | 0.96673500  | -1.58442000 | 0.05686800  |
| C   | 1.61186800  | 0.47407200  | -0.66029500 |
| C   | 2.24959200  | 0.36816200  | 0.74621700  |
| H   | 1.30046300  | -1.05228700 | 2.17082100  |
| H   | 2.72239700  | -1.70403600 | 1.34968600  |
| H   | 1.87680600  | 1.14320500  | 1.41735100  |
| H   | 3.33495900  | 0.47519600  | 0.68271700  |
| C   | 1.71139000  | -0.98203400 | -1.16838900 |
| H   | 1.18518100  | -1.15317000 | -2.11070500 |
| H   | 2.74249400  | -1.33457400 | -1.26577000 |
| C   | -0.29186300 | -0.74854000 | 0.03373300  |
| C   | 0.07062600  | 0.60915300  | -0.51239100 |
| H   | 0.78724000  | -2.65865300 | 0.05722400  |
| H   | 2.04757600  | 1.24335800  | -1.29709200 |
| H   | 0.53973400  | 3.25856800  | 0.35668200  |
| H   | -0.41214800 | 0.80482200  | -1.47602800 |
| O   | -1.43002000 | -1.41373000 | -0.33122300 |
| O   | -0.37595000 | 1.60507500  | 0.41666700  |
| O   | -0.15392100 | 2.90318300  | -0.21536200 |
| O   | -2.52276000 | -0.47486000 | -0.54465100 |
| C   | -3.18755400 | -0.29089100 | 0.70179000  |
| H   | -2.52534300 | 0.18012800  | 1.43259300  |
| H   | -4.00903700 | 0.38713000  | 0.46084700  |
| H   | -3.58221800 | -1.23841700 | 1.07919300  |

norbornene – methylperoxyl – hydroperoxyl radical elimination TS - exo path

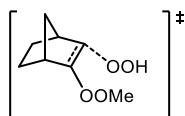

TS freq.: -365.21 cm<sup>-1</sup>

CBS-QB3 Enthalpy= -612.306444 CBS-QB3 Free Energy= -612.358378

|     |            |             |             |
|-----|------------|-------------|-------------|
| 0 2 |            |             |             |
| C   | 1.90047300 | -0.33626300 | 1.37000000  |
| C   | 1.45966600 | -1.28965600 | 0.21069400  |
| C   | 1.63427600 | 0.71927600  | -0.81421400 |
| C   | 2.07814300 | 1.03527200  | 0.64630900  |
| H   | 1.15400900 | -0.29689800 | 2.16432500  |
| H   | 2.83710800 | -0.69042600 | 1.80800300  |

|   |             |             |             |
|---|-------------|-------------|-------------|
| H | 1.47315500  | 1.82307500  | 1.08778400  |
| H | 3.12441100  | 1.35174100  | 0.65239200  |
| C | 2.25114500  | -0.69468900 | -0.98426600 |
| H | 2.00631700  | -1.16857200 | -1.93653300 |
| H | 3.33520900  | -0.71216000 | -0.83201900 |
| C | 0.07721000  | -0.86842400 | -0.22626000 |
| C | 0.13411500  | 0.39230800  | -0.80656700 |
| H | 1.56509700  | -2.35322500 | 0.41882800  |
| H | 1.92652000  | 1.47349300  | -1.54410000 |
| H | -0.57598900 | 0.75573800  | -1.53261300 |
| O | -0.96140500 | -1.66437100 | 0.05976300  |
| O | -0.73545700 | 1.60433200  | 0.48237300  |
| O | -1.73924600 | 2.33131900  | -0.19946700 |
| O | -2.18308400 | -1.14327800 | -0.54582000 |
| C | -3.01788400 | -0.71206000 | 0.53045100  |
| H | -3.91529300 | -0.35087400 | 0.02350600  |
| H | -3.27123200 | -1.55177400 | 1.18364100  |
| H | -2.54427600 | 0.10352100  | 1.07802700  |
| H | -1.26435700 | 3.11776200  | -0.50290400 |

norbornene – methylperoxyl – hydroperoxyl radical elimination TS - endo path

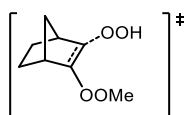

TS freq.: -330.75 cm<sup>-1</sup>

CBS-QB3 Enthalpy= -612.311214 CBS-QB3 Free Energy= -612.363450

|     |             |             |             |
|-----|-------------|-------------|-------------|
| 0 2 |             |             |             |
| C   | 2.33417200  | -1.32365600 | 0.05506300  |
| C   | 1.36127000  | -0.70052600 | -1.00063300 |
| C   | 1.60471400  | 0.96886100  | 0.50630200  |
| C   | 2.48665900  | -0.17383700 | 1.10250500  |
| H   | 1.93474000  | -2.24417300 | 0.48394900  |
| H   | 3.29025000  | -1.56446200 | -0.41760800 |
| H   | 2.15536300  | -0.46856700 | 2.10025900  |
| H   | 3.52673600  | 0.15245100  | 1.18445900  |
| C   | 1.84084600  | 0.76889600  | -1.00995500 |
| H   | 1.21767300  | 1.42240300  | -1.61799100 |
| H   | 2.89104900  | 0.86366700  | -1.29868300 |
| C   | 0.04899900  | -0.52592700 | -0.27195600 |
| C   | 0.14884700  | 0.53467200  | 0.61408000  |
| H   | 1.30600700  | -1.23065400 | -1.95021900 |
| H   | 1.80250700  | 1.96099100  | 0.90842500  |
| H   | -0.43047400 | 0.60311700  | 1.52270300  |
| O   | -0.92322000 | -1.42524100 | -0.47733500 |
| O   | -0.69607100 | 2.10717700  | -0.20910900 |
| O   | -2.09612000 | 2.03989600  | -0.09682000 |
| O   | -1.90410500 | -1.38837400 | 0.61470200  |
| C   | -3.16260200 | -1.11679700 | 0.00322900  |
| H   | -3.86807800 | -1.17166900 | 0.83622700  |
| H   | -3.17250900 | -0.11747800 | -0.43625300 |
| H   | -3.41019900 | -1.88332100 | -0.73626900 |
| H   | -2.26436000 | 2.41991500  | 0.77768800  |

norbornene – methylperoxyl

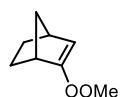

CBS-QB3 Enthalpy= -461.578531 CBS-QB3 Free Energy= -461.624191

|     |             |             |             |
|-----|-------------|-------------|-------------|
| 0 1 |             |             |             |
| C   | -1.72588300 | -1.15487100 | -0.71882100 |
| C   | -0.90901100 | -0.94453100 | 0.60066500  |
| C   | -1.66351100 | 1.12957000  | 0.14239000  |
| C   | -2.26591700 | 0.27774000  | -1.02693500 |
| H   | -1.10185800 | -1.55874900 | -1.51755500 |
| H   | -2.54284800 | -1.86029000 | -0.54557700 |
| H   | -1.94462300 | 0.64823100  | -2.00147200 |
| H   | -3.35948000 | 0.30164100  | -1.00394900 |

|   |             |             |             |
|---|-------------|-------------|-------------|
| C | -1.77553800 | 0.12044800  | 1.30944700  |
| H | -1.32922500 | 0.48867200  | 2.23454900  |
| H | -2.79784300 | -0.22186300 | 1.49761000  |
| C | 0.27598900  | -0.07361000 | 0.21731600  |
| C | -0.15152500 | 1.16433900  | -0.05855400 |
| H | -0.66672000 | -1.85632400 | 1.14527900  |
| H | -2.14162100 | 2.09885800  | 0.28366200  |
| H | 0.41344600  | 1.96565400  | -0.50849200 |
| O | 1.47483900  | -0.69132300 | 0.08591200  |
| O | 2.41540100  | 0.20634100  | -0.58872900 |
| C | 3.63150700  | 0.08817400  | 0.13017000  |
| H | 4.32770300  | 0.72678700  | -0.41829600 |
| H | 3.52701600  | 0.44675700  | 1.15863300  |
| H | 3.99746900  | -0.94308000 | 0.12406600  |

norbornene – 2-methylperoxyl 1-hydroperoxyl peroxide fragmentation TS - exo path

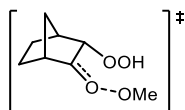

TS freq.: -199.97 cm<sup>-1</sup>

CBS-QB3 Enthalpy= -612.336713 CBS-QB3 Free Energy= -612.388139

|     |             |             |             |
|-----|-------------|-------------|-------------|
| 0 2 |             |             |             |
| C   | 1.49380700  | -1.24593800 | 1.28725400  |
| C   | 0.79666200  | -1.63576000 | -0.04653900 |
| C   | 1.72929800  | 0.38489400  | -0.52069200 |
| C   | 2.10271600  | 0.15716500  | 0.96504200  |
| H   | 0.79314500  | -1.21985700 | 2.12298000  |
| H   | 2.27433400  | -1.97350900 | 1.52795300  |
| H   | 1.69475700  | 0.93624900  | 1.60996200  |
| H   | 3.18823500  | 0.15674000  | 1.08774400  |
| C   | 1.79680800  | -1.05235600 | -1.08436300 |
| H   | 1.44027500  | -1.13777800 | -2.11364400 |
| H   | 2.79599400  | -1.49189300 | -1.01404000 |
| C   | -0.35824700 | -0.68856600 | -0.26325700 |
| C   | 0.20238600  | 0.66581500  | -0.62193100 |
| H   | 0.53109200  | -2.68763500 | -0.13970400 |
| H   | 2.33519400  | 1.13497900  | -1.02747400 |
| H   | 0.76622900  | 3.17880800  | 0.55534400  |
| H   | -0.09288300 | 0.97697600  | -1.63160700 |
| O   | -1.51715000 | -1.18088700 | -0.70283400 |
| O   | -0.29766000 | 1.63585000  | 0.30518300  |
| O   | 0.16367800  | 2.94006800  | -0.16207000 |
| O   | -2.65046300 | -0.19546100 | -0.46640300 |
| C   | -3.05756300 | -0.33027500 | 0.88133600  |
| H   | -2.24254600 | -0.08796600 | 1.57194800  |
| H   | -3.84784600 | 0.41712000  | 0.99282200  |
| H   | -3.45842700 | -1.32866900 | 1.08561400  |

norbornene – hydroperoxyl ketone product - exo path

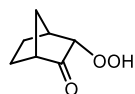

CBS-QB3 Enthalpy= -497.532047 CBS-QB3 Free Energy= -497.576242

|     |             |             |             |
|-----|-------------|-------------|-------------|
| 0 1 |             |             |             |
| C   | 1.67385500  | -0.44814100 | -1.10179500 |
| C   | 1.67341700  | 0.46513500  | 0.16272200  |
| C   | 0.07194600  | -1.10035900 | 0.61473300  |
| C   | 0.56820500  | -1.50628300 | -0.79032100 |
| H   | 1.47822900  | 0.11704800  | -2.01478100 |
| H   | 2.65732600  | -0.91231700 | -1.20692500 |
| H   | -0.24396400 | -1.48684100 | -1.51720300 |
| H   | 0.97934300  | -2.51778700 | -0.77423000 |
| C   | 1.35938500  | -0.55866200 | 1.27740100  |
| H   | 1.18927300  | -0.09927200 | 2.25534900  |
| H   | 2.13594500  | -1.31985000 | 1.37962700  |
| C   | 0.36640600  | 1.23810800  | 0.08825700  |
| C   | -0.73601500 | 0.20990800  | 0.49275000  |

|   |             |             |             |
|---|-------------|-------------|-------------|
| H | 2.54754900  | 1.10482600  | 0.26802200  |
| H | -0.45763000 | -1.88410800 | 1.15429400  |
| H | -1.14406600 | 0.50404900  | 1.46902800  |
| O | 0.18220100  | 2.38223000  | -0.22649400 |
| O | -1.75312400 | 0.25313900  | -0.47988500 |
| O | -2.85941400 | -0.56121500 | 0.02115100  |
| H | -3.56250500 | 0.10278600  | 0.00615900  |

norbornene – hydroperoxyl ketone product - endo path

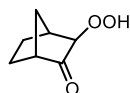

CBS-QB3 Enthalpy= -497.533685 CBS-QB3 Free Energy= -497.576510

|     |             |             |             |
|-----|-------------|-------------|-------------|
| 0 1 |             |             |             |
| C   | 2.11963500  | 0.60112500  | -0.57153000 |
| C   | 1.11572500  | 0.97513500  | 0.55706500  |
| C   | 0.66761600  | -1.22886100 | 0.13923100  |
| C   | 1.82133400  | -0.90947700 | -0.84188600 |
| H   | 1.99619000  | 1.22478400  | -1.45938500 |
| H   | 3.13974700  | 0.74928600  | -0.21131300 |
| H   | 1.54702200  | -1.10315600 | -1.88122900 |
| H   | 2.69103700  | -1.52927900 | -0.61493800 |
| C   | 1.04208400  | -0.35116000 | 1.35920800  |
| H   | 0.27604500  | -0.34806900 | 2.13637700  |
| H   | 2.00304500  | -0.62318000 | 1.80196900  |
| C   | -0.26957900 | 0.96493300  | -0.06317100 |
| C   | -0.58372800 | -0.51905200 | -0.39898400 |
| H   | 1.33868300  | 1.89468600  | 1.09450500  |
| H   | 0.50650200  | -2.28909800 | 0.32947200  |
| H   | -0.78000100 | -0.68992900 | -1.46146000 |
| O   | -1.06015400 | 1.87506400  | -0.16066900 |
| O   | -1.72535200 | -0.91221500 | 0.36088700  |
| O   | -2.89261400 | -0.34838300 | -0.28780500 |
| H   | -2.77183700 | 0.60236400  | -0.11290400 |

norbornene – methoxy radical addition TS – exo path

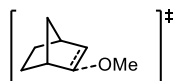

TS freq.: -185.24 cm<sup>-1</sup>

CBS-QB3 Enthalpy= -387.033103 CBS-QB3 Free Energy= -387.077738

|     |             |             |             |
|-----|-------------|-------------|-------------|
| 0 2 |             |             |             |
| C   | -1.96247300 | -0.91790900 | -0.56382700 |
| C   | -0.53289400 | -1.07961400 | 0.05230000  |
| C   | -1.04049500 | 1.07375200  | 0.51751200  |
| C   | -2.32371600 | 0.56421300  | -0.23078200 |
| H   | -1.97572900 | -1.12522400 | -1.63590200 |
| H   | -2.65838500 | -1.61239800 | -0.08650900 |
| H   | -2.54494900 | 1.15841700  | -1.11944800 |
| H   | -3.19062300 | 0.62487100  | 0.43280300  |
| C   | -0.65937900 | -0.19706400 | 1.31470200  |
| H   | 0.28773900  | -0.10422800 | 1.84262100  |
| H   | -1.45077400 | -0.52651200 | 1.99416400  |
| C   | 0.38812900  | -0.21384900 | -0.78720400 |
| C   | 0.05414400  | 1.08327700  | -0.52641400 |
| H   | -0.20140100 | -2.10659800 | 0.19219400  |
| H   | -1.18387800 | 1.99778500  | 1.07678900  |
| H   | 0.93251900  | -0.56901400 | -1.65099000 |
| H   | 0.41293800  | 1.96192300  | -1.04789700 |
| O   | 2.20108000  | -0.51461100 | 0.35853400  |
| C   | 3.26815800  | 0.22079100  | -0.13051800 |
| H   | 4.17112400  | -0.18857200 | 0.35357400  |
| H   | 3.41740300  | 0.11403400  | -1.21775900 |
| H   | 3.22653900  | 1.29082500  | 0.12346900  |

norbornene – methoxy radical addition TS - endo path



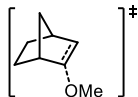

TS freq.: -292.36 cm<sup>-1</sup>

CBS-QB3 Enthalpy= -387.029077 CBS-QB3 Free Energy= -387.073020

| 0 2 |             |             |             |
|-----|-------------|-------------|-------------|
| C   | -0.82020400 | 1.42814400  | -0.34336700 |
| C   | -0.77997900 | 0.10998900  | -1.17695900 |
| C   | -1.33876900 | -0.62373300 | 0.88651900  |
| C   | -1.13771300 | 0.92067100  | 1.09461000  |
| H   | 0.11878400  | 1.97091500  | -0.39685100 |
| H   | -1.62184200 | 2.06650300  | -0.72435600 |
| H   | -0.32334400 | 1.12723500  | 1.78852000  |
| H   | -2.05241200 | 1.36702400  | 1.49395700  |
| C   | -1.97143000 | -0.64614600 | -0.53020300 |
| H   | -2.11005200 | -1.65742700 | -0.91869500 |
| H   | -2.91404600 | -0.09391800 | -0.59672600 |
| C   | 0.38136600  | -0.74488300 | -0.67469700 |
| C   | 0.00979000  | -1.22066700 | 0.55737700  |
| H   | -0.81010100 | 0.25966100  | -2.25559600 |
| H   | -1.88542600 | -1.11634400 | 1.69026800  |
| H   | 1.16177100  | -1.13567500 | -1.31009900 |
| H   | 0.60373400  | -1.83964100 | 1.21688500  |
| O   | 1.86496900  | 0.59116700  | -0.01061800 |
| C   | 3.08251000  | -0.06222800 | 0.11996200  |
| H   | 3.83948600  | 0.71542200  | 0.30993300  |
| H   | 3.12253700  | -0.75488100 | 0.97569200  |
| H   | 3.39772500  | -0.60508900 | -0.78744800 |

norbornene – methoxy adduct - exo path

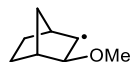

CBS-QB3 Enthalpy= -387.075371 CBS-QB3 Free Energy= -387.118424

| 0 2 |             |             |             |
|-----|-------------|-------------|-------------|
| C   | -1.66665100 | -1.01781000 | -0.67127500 |
| C   | -0.42579400 | -1.04667200 | 0.25693800  |
| C   | -1.12983500 | 1.10396200  | 0.40030300  |
| C   | -2.19672900 | 0.44616500  | -0.53448100 |
| H   | -1.41234500 | -1.27452000 | -1.70320900 |
| H   | -2.41202300 | -1.74142200 | -0.33368100 |
| H   | -2.27817100 | 0.96093800  | -1.49395200 |
| H   | -3.18211600 | 0.47374200  | -0.05901400 |
| C   | -0.84428700 | -0.06726000 | 1.37506400  |
| H   | -0.03466600 | 0.14113600  | 2.07489600  |
| H   | -1.73259900 | -0.39273300 | 1.92347500  |
| C   | 0.70863400  | -0.25712500 | -0.42744500 |
| C   | 0.15511000  | 1.14777200  | -0.37339800 |
| H   | -0.10779100 | -2.04178700 | 0.56675400  |
| H   | -1.44955500 | 2.05083700  | 0.83732100  |
| H   | 0.90294700  | -0.60550800 | -1.45456800 |
| H   | 0.49360100  | 1.98265900  | -0.97414300 |
| O   | 1.90690200  | -0.44471300 | 0.34358600  |
| C   | 3.04511700  | 0.18584500  | -0.20851900 |
| H   | 3.89466800  | -0.08344000 | 0.42041600  |
| H   | 3.24031000  | -0.16090100 | -1.23463000 |
| H   | 2.94913600  | 1.27944800  | -0.22148200 |

norbornene – methoxy adduct - endo path

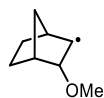

CBS-QB3 Enthalpy= -387.075364 CBS-QB3 Free Energy= -387.118367

| 0 2 |            |            |             |
|-----|------------|------------|-------------|
| C   | 0.61780700 | 1.46363800 | -0.20537100 |

|   |             |             |             |
|---|-------------|-------------|-------------|
| C | 0.14351800  | 0.49735000  | 0.90690800  |
| C | 1.67460800  | -0.73872900 | -0.22746400 |
| C | 1.70769400  | 0.64120300  | -0.96398000 |
| H | -0.20764700 | 1.75209800  | -0.85677400 |
| H | 1.03793900  | 2.37329700  | 0.23059700  |
| H | 1.49310600  | 0.53942200  | -2.02925300 |
| H | 2.69836700  | 1.09658700  | -0.86461000 |
| C | 1.43743100  | -0.27634500 | 1.23385400  |
| H | 1.28702400  | -1.10814900 | 1.92696200  |
| H | 2.23341900  | 0.36805700  | 1.61779500  |
| C | -0.70376300 | -0.63429600 | 0.24241300  |
| C | 0.35139500  | -1.36929000 | -0.53401200 |
| H | -0.34935700 | 0.98556100  | 1.74878400  |
| H | 2.55174200  | -1.35908600 | -0.41538600 |
| H | -1.14375100 | -1.26969100 | 1.03430700  |
| H | 0.12507300  | -2.00485900 | -1.38022700 |
| O | -1.75560900 | -0.20313200 | -0.61401100 |
| C | -2.90068500 | 0.26437200  | 0.07532100  |
| H | -3.66282500 | 0.47138400  | -0.67677800 |
| H | -3.28549500 | -0.49328800 | 0.77305500  |
| H | -2.70075000 | 1.18630200  | 0.63759900  |

norbornene – methoxy fragmentation TS - exo path

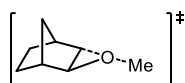

TS freq.: -788.40 cm<sup>-1</sup>

CBS-QB3 Enthalpy= -386.999275 CBS-QB3 Free Energy= -387.043619

|   |             |             |             |
|---|-------------|-------------|-------------|
| 0 | 2           |             |             |
| C | 1.66960500  | 1.13967100  | -0.51618500 |
| C | 0.26041400  | 1.06432100  | 0.13183600  |
| C | 1.11159200  | -1.00819000 | 0.51710500  |
| C | 2.28154000  | -0.27063400 | -0.21567300 |
| H | 1.61596700  | 1.34720700  | -1.58870900 |
| H | 2.26506000  | 1.93526300  | -0.06299300 |
| H | 2.60278900  | -0.79318100 | -1.11940900 |
| H | 3.14890600  | -0.19838300 | 0.44689300  |
| C | 0.52736400  | 0.15543800  | 1.35074600  |
| H | -0.37861800 | -0.11907500 | 1.88620600  |
| H | 1.25924400  | 0.57913900  | 2.04278300  |
| C | -0.56219800 | 0.11973100  | -0.76886200 |
| C | 0.06948300  | -1.18660700 | -0.55491900 |
| H | -0.20255100 | 2.03081800  | 0.33322800  |
| H | 1.40915600  | -1.90599400 | 1.05778100  |
| H | -0.81278000 | 0.49161600  | -1.76600700 |
| H | -0.02594600 | -2.02679200 | -1.22540500 |
| O | -1.57934100 | -0.61713800 | -0.12374400 |
| C | -3.32110900 | 0.36380000  | 0.13832400  |
| H | -3.85849300 | -0.45914600 | 0.58732600  |
| H | -3.04040900 | 1.18062900  | 0.79048700  |
| H | -3.56774400 | 0.60982700  | -0.88645600 |

norbornene – methoxy fragmentation TS - endo path

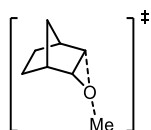

TS freq.: -783.70 cm<sup>-1</sup>

CBS-QB3 Enthalpy= -386.992468 CBS-QB3 Free Energy= -387.036629

|   |             |             |             |
|---|-------------|-------------|-------------|
| 0 | 2           |             |             |
| C | 0.45901300  | 1.51200300  | 0.16230000  |
| C | 0.46072600  | 0.32650300  | 1.15364600  |
| C | 1.47727900  | -0.54372300 | -0.67872700 |
| C | 1.12966000  | 0.91052700  | -1.11317600 |
| H | -0.54580600 | 1.87671500  | -0.04226300 |
| H | 1.04843600  | 2.33719400  | 0.57103500  |
| H | 0.45959800  | 0.92055700  | -1.97199700 |
| H | 2.04473600  | 1.44578900  | -1.38117000 |

|   |             |             |             |
|---|-------------|-------------|-------------|
| C | 1.82384600  | -0.33183000 | 0.82584700  |
| H | 1.99594300  | -1.27031700 | 1.35984500  |
| H | 2.67870500  | 0.33207900  | 0.98819400  |
| C | -0.51569100 | -0.77602400 | 0.62473900  |
| C | 0.21483900  | -1.35457800 | -0.50598400 |
| H | 0.29429300  | 0.60424000  | 2.19519600  |
| H | 2.23147100  | -1.02464500 | -1.30253500 |
| H | -1.00668800 | -1.38778800 | 1.38706000  |
| H | -0.01259100 | -2.30289000 | -0.96730000 |
| O | -1.33003900 | -0.42873200 | -0.47266900 |
| C | -3.14979000 | 0.36023800  | 0.00423000  |
| H | -3.45867000 | 0.57207900  | -1.00927100 |
| H | -3.59823300 | -0.49702900 | 0.48844900  |
| H | -2.89016900 | 1.20517400  | 0.62885400  |

norbornene – methoxy + oxygen adduct - exo path

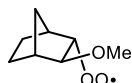

CBS-QB3 Enthalpy= -537.297066 CBS-QB3 Free Energy= -537.344774

|     |             |             |             |
|-----|-------------|-------------|-------------|
| 0 2 |             |             |             |
| C   | -1.87418100 | -0.41250700 | -1.21081400 |
| C   | -0.86950800 | -1.29639500 | -0.43527500 |
| C   | -1.27185900 | 0.42111100  | 0.99345700  |
| C   | -2.17711000 | 0.75308000  | -0.21604500 |
| H   | -1.46195900 | -0.05608600 | -2.15821300 |
| H   | -2.77774700 | -0.97977600 | -1.44473000 |
| H   | -1.96769700 | 1.73639600  | -0.63618700 |
| H   | -3.22377800 | 0.74495200  | 0.09692500  |
| C   | -1.34467800 | -1.12293400 | 1.02486900  |
| H   | -0.66544000 | -1.58359900 | 1.74447100  |
| H   | -2.35869500 | -1.48972700 | 1.20118200  |
| C   | 0.48624400  | -0.57207300 | -0.39795300 |
| C   | 0.19913300  | 0.61128400  | 0.58994200  |
| H   | -0.77579600 | -2.31681200 | -0.80483000 |
| H   | -1.53908800 | 0.94311400  | 1.91248500  |
| H   | 0.79409100  | -0.18853400 | -1.37952200 |
| H   | 0.87793500  | 0.55908400  | 1.44219600  |
| O   | 1.46167300  | -1.46066500 | 0.11250000  |
| C   | 2.80157100  | -1.02498600 | -0.07247000 |
| H   | 3.44158100  | -1.78524300 | 0.37529300  |
| H   | 3.04123800  | -0.93366300 | -1.14050100 |
| H   | 2.99086000  | -0.05690000 | 0.40474100  |
| O   | 0.38100500  | 1.92957800  | -0.00728400 |
| O   | 1.64817500  | 2.18950200  | -0.26366200 |

norbornene – methoxy + oxygen adduct - endo path

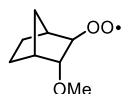

CBS-QB3 Enthalpy= -537.298238 CBS-QB3 Free Energy= -537.345893

|     |             |             |             |
|-----|-------------|-------------|-------------|
| 0 2 |             |             |             |
| C   | 1.94998100  | 1.17020100  | -0.16503100 |
| C   | 1.09080800  | 0.63481500  | 1.00142200  |
| C   | 1.16885500  | -1.12938600 | -0.42077600 |
| C   | 1.98454200  | -0.03660600 | -1.15589700 |
| H   | 1.51479200  | 2.06627900  | -0.60487800 |
| H   | 2.95288400  | 1.41986700  | 0.18936600  |
| H   | 1.55737300  | 0.20949400  | -2.13110200 |
| H   | 3.00534300  | -0.38522000 | -1.32749800 |
| C   | 1.51506900  | -0.84692200 | 1.05962800  |
| H   | 0.92843800  | -1.44835900 | 1.75816200  |
| H   | 2.57601400  | -0.97886800 | 1.28395600  |
| C   | -0.37197500 | 0.50646300  | 0.52130000  |
| C   | -0.30042000 | -0.70469500 | -0.46817700 |
| H   | 1.17963000  | 1.20769000  | 1.92458300  |
| H   | 1.33491400  | -2.14276800 | -0.78673700 |
| H   | -1.02870200 | 0.23223000  | 1.35767900  |
| H   | -0.67208700 | -0.44959200 | -1.46157200 |

|   |             |             |             |
|---|-------------|-------------|-------------|
| O | -0.81488700 | 1.70584000  | -0.07208700 |
| C | -2.22694000 | 1.81444000  | -0.19068300 |
| H | -2.42676800 | 2.77083300  | -0.67392600 |
| H | -2.65225800 | 1.00187900  | -0.78982700 |
| H | -2.70683100 | 1.80076500  | 0.79703000  |
| O | -1.09811200 | -1.84303800 | -0.00096800 |
| O | -2.38978400 | -1.58206300 | -0.00518900 |

norbornene – methoxy 1,4-HAT TS - exo path

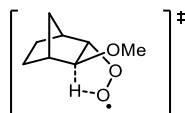

TS freq.: -1837.03 cm<sup>-1</sup>

CBS-QB3 Enthalpy= -537.256506 CBS-QB3 Free Energy= -537.302571

|     |             |             |             |
|-----|-------------|-------------|-------------|
| 0 2 |             |             |             |
| C   | -1.72340300 | -0.35832400 | -1.24580100 |
| C   | -0.67413100 | -1.27081100 | -0.56102500 |
| C   | -1.29163700 | 0.16039900  | 1.09605900  |
| C   | -2.12248000 | 0.64189100  | -0.11392200 |
| H   | -1.32310800 | 0.14885100  | -2.12441100 |
| H   | -2.57805500 | -0.95824600 | -1.56805500 |
| H   | -1.89968700 | 1.67451600  | -0.37598100 |
| H   | -3.18780900 | 0.57166300  | 0.12025400  |
| C   | -1.25675800 | -1.37112500 | 0.87521100  |
| H   | -0.59796700 | -1.90332000 | 1.56650900  |
| H   | -2.24791400 | -1.83142800 | 0.90501500  |
| C   | 0.58360200  | -0.45249900 | -0.29489400 |
| C   | 0.21153500  | 0.48306700  | 0.90703200  |
| H   | -0.46425400 | -2.20561600 | -1.07922400 |
| H   | -1.66968000 | 0.50342200  | 2.05988600  |
| H   | 0.68618300  | 0.64158700  | -1.04351700 |
| H   | 0.76154000  | 0.24815300  | 1.82418900  |
| O   | 1.72689800  | -1.19920200 | -0.25317100 |
| C   | 2.93621800  | -0.47972800 | 0.01285000  |
| H   | 3.73999100  | -1.21251600 | -0.02287600 |
| H   | 3.09148100  | 0.29035300  | -0.74832200 |
| H   | 2.91145200  | -0.00425900 | 0.99724800  |
| O   | 0.61581800  | 1.80024700  | 0.55250400  |
| O   | 0.50730300  | 1.88890700  | -0.86980500 |

norbornene – methoxy 1,4-HAT TS - endo path

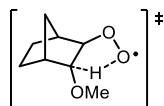

TS freq.: -1893.79 cm<sup>-1</sup>

CBS-QB3 Enthalpy= -537.259220 CBS-QB3 Free Energy= -537.305367

|     |             |             |             |
|-----|-------------|-------------|-------------|
| 0 2 |             |             |             |
| C   | 1.78972500  | -1.37627100 | -0.07677300 |
| C   | 0.88166800  | -0.59702300 | -1.07103000 |
| C   | 1.27545900  | 0.92463100  | 0.56476300  |
| C   | 2.07399100  | -0.31752900 | 1.03739100  |
| H   | 1.29510500  | -2.27198100 | 0.30147800  |
| H   | 2.70987600  | -1.69015400 | -0.57539800 |
| H   | 1.76530000  | -0.65758800 | 2.02946700  |
| H   | 3.13839000  | -0.07960400 | 1.09406500  |
| C   | 1.45707400  | 0.83343500  | -0.96616500 |
| H   | 0.88455200  | 1.57970800  | -1.51398900 |
| H   | 2.50664600  | 0.88376300  | -1.26672000 |
| C   | -0.47132100 | -0.40356000 | -0.41014500 |
| C   | -0.21848200 | 0.58189900  | 0.78353400  |
| H   | 0.81899700  | -1.04003900 | -2.06510200 |
| H   | 1.56079900  | 1.86170800  | 1.04344200  |
| H   | -1.14624800 | 0.60078300  | -0.99657200 |
| H   | -0.39114500 | 0.15899100  | 1.77769300  |
| O   | -1.19693800 | -1.54473500 | -0.23526600 |
| C   | -2.50070600 | -1.37766700 | 0.33243400  |
| H   | -2.94269500 | -2.37110300 | 0.37950800  |

|   |             |             |             |
|---|-------------|-------------|-------------|
| H | -2.44675900 | -0.94733300 | 1.33628800  |
| H | -3.10695900 | -0.72389400 | -0.30124600 |
| O | -1.17762400 | 1.62876600  | 0.66310300  |
| O | -1.42172600 | 1.80212500  | -0.72870900 |

norbornene – methoxy – hydroperoxyl - exo path

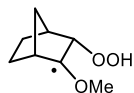

CBS-QB3 Enthalpy= -537.280055 CBS-QB3 Free Energy= -537.329652

|     |             |             |             |
|-----|-------------|-------------|-------------|
| 0 2 |             |             |             |
| C   | -1.85033000 | -0.80927800 | -1.09533200 |
| C   | -0.97006600 | -1.45900400 | 0.00727700  |
| C   | -1.17009900 | 0.68831500  | 0.71383500  |
| C   | -1.92633800 | 0.68367500  | -0.63763900 |
| H   | -1.41097600 | -0.92265700 | -2.08725900 |
| H   | -2.84221900 | -1.27067400 | -1.10997000 |
| H   | -1.45998900 | 1.35611100  | -1.35938600 |
| H   | -2.96042200 | 1.00797100  | -0.49899100 |
| C   | -1.49203400 | -0.71720300 | 1.26917300  |
| H   | -0.93141100 | -0.96765900 | 2.17362200  |
| H   | -2.55897500 | -0.86985100 | 1.45788200  |
| C   | 0.41112200  | -0.86637400 | -0.11118800 |
| C   | 0.35170300  | 0.53280700  | 0.44532300  |
| H   | -0.97766000 | -2.54807400 | 0.02227100  |
| H   | -1.40328100 | 1.53468600  | 1.35951600  |
| H   | 0.34995500  | 3.24071200  | -0.38340400 |
| H   | 0.91940000  | 0.64718300  | 1.38037700  |
| O   | 1.48154700  | -1.69301000 | 0.00403600  |
| C   | 2.77366900  | -1.09933300 | -0.15275900 |
| H   | 3.48991600  | -1.91752800 | -0.09346900 |
| H   | 2.85046200  | -0.59600300 | -1.11983100 |
| H   | 2.98047600  | -0.37610400 | 0.64147600  |
| O   | 0.91423900  | 1.43843500  | -0.51420800 |
| O   | 1.00283500  | 2.74960700  | 0.13330100  |

norbornene – methoxy – hydroperoxyl - endo path

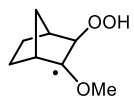

CBS-QB3 Enthalpy= -537.279911 CBS-QB3 Free Energy= -537.328816

|     |             |             |             |
|-----|-------------|-------------|-------------|
| 0 2 |             |             |             |
| C   | 1.95375500  | -1.26323300 | 0.01250000  |
| C   | 0.97916300  | -0.65147300 | -1.04237900 |
| C   | 1.13370600  | 0.98894900  | 0.51412300  |
| C   | 2.06054500  | -0.12274100 | 1.07731100  |
| H   | 1.56368200  | -2.19615300 | 0.42339400  |
| H   | 2.92421900  | -1.48106100 | -0.44192100 |
| H   | 1.75756500  | -0.44920500 | 2.07579300  |
| H   | 3.08494500  | 0.24817700  | 1.15647700  |
| C   | 1.38764300  | 0.83763900  | -1.00370900 |
| H   | 0.75382000  | 1.48270300  | -1.60868300 |
| H   | 2.43616000  | 0.99397700  | -1.27099200 |
| C   | -0.38436300 | -0.56857400 | -0.40865200 |
| C   | -0.31798500 | 0.48115300  | 0.68297900  |
| H   | 0.99300700  | -1.15368400 | -2.01020300 |
| H   | 1.28789400  | 1.97648700  | 0.94861700  |
| H   | -1.87648300 | 1.57804900  | -1.14082500 |
| H   | -0.47229300 | 0.05901200  | 1.68562600  |
| O   | -1.09233800 | -1.72502500 | -0.30516200 |
| C   | -2.39953700 | -1.64395300 | 0.26408900  |
| H   | -2.79079800 | -2.66011200 | 0.27226200  |
| H   | -2.37474800 | -1.25424900 | 1.28525900  |
| H   | -3.04763600 | -1.00482600 | -0.34431200 |
| O   | -1.36627400 | 1.47224500  | 0.68157200  |
| O   | -1.38099900 | 2.19206500  | -0.57741800 |

norbornene – methoxy – hydroperoxyl radical elimination TS - exo path

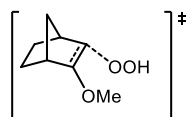

TS freq.: -360.51 cm<sup>-1</sup>

CBS-QB3 Enthalpy= -537.251868 CBS-QB3 Free Energy= -537.301105

|   |             |             |             |
|---|-------------|-------------|-------------|
| 0 | 2           |             |             |
| C | 1.76992500  | 0.03899900  | -1.28707600 |
| C | 1.44012000  | 1.09177800  | -0.17680300 |
| C | 1.12637600  | -0.88095200 | 0.87896700  |
| C | 1.60486600  | -1.32043900 | -0.53803600 |
| H | 1.09636400  | 0.13159000  | -2.14017700 |
| H | 2.79114000  | 0.18249600  | -1.64953400 |
| H | 0.88263900  | -1.97620100 | -1.01792400 |
| H | 2.55993500  | -1.84633600 | -0.45817600 |
| C | 2.00290300  | 0.38389600  | 1.08132700  |
| H | 1.78763500  | 0.92165000  | 2.00687800  |
| H | 3.07575800  | 0.17540800  | 1.01881100  |
| C | -0.03029500 | 0.97595500  | 0.13722200  |
| C | -0.26888400 | -0.25811100 | 0.74456800  |
| H | 1.77156400  | 2.10687100  | -0.39058200 |
| H | 1.20225300  | -1.65834400 | 1.63887600  |
| H | -2.00263100 | -2.76913600 | 0.34395900  |
| H | -1.07963100 | -0.47221700 | 1.42583500  |
| O | -0.87638400 | 1.92461100  | -0.25934200 |
| C | -2.27606300 | 1.69936700  | -0.01036000 |
| H | -2.79655300 | 2.53209300  | -0.47869200 |
| H | -2.57867100 | 0.74724600  | -0.44636900 |
| H | -2.47355900 | 1.70067800  | 1.06578800  |
| O | -1.30236400 | -1.28341500 | -0.57946800 |
| O | -2.37749200 | -1.91103800 | 0.10161700  |

norbornene – methoxy – hydroperoxyl radical elimination TS - endo path

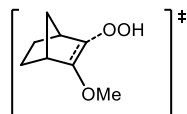

TS freq.: -345.98 cm<sup>-1</sup>

CBS-QB3 Enthalpy= -537.255183 CBS-QB3 Free Energy= -537.303998

|   |             |             |             |
|---|-------------|-------------|-------------|
| 0 | 2           |             |             |
| C | -2.27813900 | 0.86550000  | -0.22392200 |
| C | -1.05400900 | 0.39392700  | -1.07972300 |
| C | -1.01962100 | -1.03256100 | 0.67484500  |
| C | -2.23810700 | -0.10892200 | 0.99801600  |
| H | -2.19698800 | 1.91580900  | 0.06244900  |
| H | -3.20127800 | 0.74921000  | -0.79803600 |
| H | -2.11583300 | 0.41405500  | 1.94918600  |
| H | -3.15562700 | -0.69940500 | 1.06522400  |
| C | -1.12763600 | -1.13565800 | -0.86503700 |
| H | -0.29248500 | -1.67832400 | -1.30335400 |
| H | -2.07684700 | -1.56284300 | -1.20014300 |
| C | 0.16271100  | 0.71120300  | -0.24993200 |
| C | 0.23795400  | -0.18495900 | 0.81492800  |
| H | -1.03112600 | 0.77310500  | -2.10077600 |
| H | -0.98880600 | -1.96720800 | 1.23178700  |
| H | 2.50653200  | -1.42617300 | -1.10211800 |
| H | 0.64759200  | 0.06259000  | 1.78621200  |
| O | 0.92454700  | 1.77439500  | -0.53968200 |
| C | 1.99391800  | 2.06442000  | 0.37245200  |
| H | 2.60457900  | 2.82488100  | -0.11019200 |
| H | 1.59620800  | 2.45651700  | 1.31361500  |
| H | 2.57880500  | 1.16264300  | 0.56795000  |
| O | 1.79510300  | -1.33040400 | 0.63768400  |
| O | 1.91320700  | -2.00181100 | -0.59944900 |

norbornene – methoxy

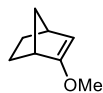

CBS-QB3 Enthalpy= -386.524663 CBS-QB3 Free Energy= -386.565594

|   |             |             |             |
|---|-------------|-------------|-------------|
| 0 | 1           |             |             |
| C | -1.26932800 | -1.17472800 | -0.72992800 |
| C | -0.48214900 | -0.94047900 | 0.60390700  |
| C | -1.25190800 | 1.11694000  | 0.10949700  |
| C | -1.81674400 | 0.24926900  | -1.06587500 |
| H | -0.62532400 | -1.58157900 | -1.51155200 |
| H | -2.08346700 | -1.88591500 | -0.56763900 |
| H | -1.47635900 | 0.61447600  | -2.03622200 |
| H | -2.91078100 | 0.26202600  | -1.06991600 |
| C | -1.38223600 | 0.11590400  | 1.28260000  |
| H | -0.96326400 | 0.49829000  | 2.21493500  |
| H | -2.40596200 | -0.23387800 | 1.44920300  |
| C | 0.70557000  | -0.07050000 | 0.24138500  |
| C | 0.26521800  | 1.16560600  | -0.05152200 |
| H | -0.23642600 | -1.84459700 | 1.15972400  |
| H | -1.74290200 | 2.08273200  | 0.23069500  |
| H | 0.81765800  | 1.99695100  | -0.46523800 |
| O | 1.92596500  | -0.64238100 | 0.15919300  |
| C | 2.97555800  | 0.20455300  | -0.29719200 |
| H | 3.88359600  | -0.39602800 | -0.28728400 |
| H | 2.77634700  | 0.55953300  | -1.31446200 |
| H | 3.09527900  | 1.06765000  | 0.36697700  |

norbornene – 2-methoxy 1-hydroperoxyl ether fragmentation TS - exo path

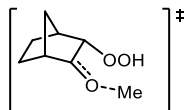

TS freq.: -592.92 cm<sup>-1</sup>

CBS-QB3 Enthalpy= -537.244678 CBS-QB3 Free Energy= -537.295307

|   |             |             |             |
|---|-------------|-------------|-------------|
| 0 | 2           |             |             |
| C | 1.10987100  | -1.26420700 | 1.20420200  |
| C | 0.78718000  | -1.53327800 | -0.29702000 |
| C | 1.47533500  | 0.63878600  | -0.28347000 |
| C | 1.56538100  | 0.23044000  | 1.20636200  |
| H | 0.24773700  | -1.44327700 | 1.84941700  |
| H | 1.91231800  | -1.92775400 | 1.53895900  |
| H | 0.92872400  | 0.85177700  | 1.83786600  |
| H | 2.59148800  | 0.33241400  | 1.56702200  |
| C | 1.87126400  | -0.67616700 | -0.99370800 |
| H | 1.75752400  | -0.63853900 | -2.08015700 |
| H | 2.88940200  | -0.99422200 | -0.75470700 |
| C | -0.45019600 | -0.73296000 | -0.64898900 |
| C | -0.01671100 | 0.74008400  | -0.68711000 |
| H | 0.71725000  | -2.58606200 | -0.56775300 |
| H | 2.05717600  | 1.52227000  | -0.54570900 |
| H | -0.16319500 | 3.13383100  | 0.79841900  |
| H | -0.13180200 | 1.16141400  | -1.69410100 |
| O | -1.62245000 | -1.15589800 | -0.79887600 |
| C | -2.87899900 | -1.06595200 | 0.63595300  |
| H | -2.77724600 | -0.03077700 | 0.93188900  |
| H | -3.76731500 | -1.32589000 | 0.07705400  |
| H | -2.51226300 | -1.81803800 | 1.32335800  |
| O | -0.85348600 | 1.47803600  | 0.19756400  |
| O | -0.59013100 | 2.89565800  | -0.03604700 |

norbornene – 2-methoxy 1-hydroperoxyl ether fragmentation TS - endo path

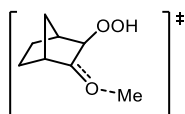

TS freq.: -585.22 cm<sup>-1</sup>

CBS-QB3 Enthalpy= -537.241195 CBS-QB3 Free Energy= -537.291445

|   |   |             |             |             |
|---|---|-------------|-------------|-------------|
| 0 | 2 |             |             |             |
| C |   | -2.12080000 | -1.26346400 | -0.08784900 |
| C |   | -0.79678300 | -1.06772500 | 0.71030600  |
| C |   | -1.29205900 | 1.03807700  | 0.01233100  |
| C |   | -2.44663100 | 0.18574700  | -0.58002000 |
| H |   | -2.00550700 | -1.97452300 | -0.90782200 |
| H |   | -2.90496700 | -1.64371800 | 0.57261100  |
| H |   | -2.49511800 | 0.25644800  | -1.66966200 |
| H |   | -3.40813600 | 0.52808100  | -0.19079200 |
| C |   | -1.05021300 | 0.31262200  | 1.36050600  |
| H |   | -0.19067200 | 0.69382000  | 1.90871200  |
| H |   | -1.93335400 | 0.32225000  | 2.00615800  |
| C |   | 0.28133800  | -0.72270100 | -0.30522900 |
| C |   | -0.02036300 | 0.69734400  | -0.79874300 |
| H |   | -0.53051500 | -1.90001000 | 1.36106900  |
| H |   | -1.49949700 | 2.10828600  | 0.05385000  |
| H |   | 1.43825200  | 2.60214300  | 0.83534000  |
| H |   | -0.20407000 | 0.70922900  | -1.88049200 |
| O |   | 1.25211500  | -1.43202300 | -0.66644000 |
| C |   | 2.93686000  | -1.30649600 | 0.23016800  |
| H |   | 2.75756400  | -1.89912100 | 1.11829500  |
| H |   | 3.54322600  | -1.76886100 | -0.53623900 |
| H |   | 3.04487800  | -0.23901600 | 0.36528000  |
| O |   | 1.06853600  | 1.62674500  | -0.73844300 |
| O |   | 1.60932800  | 1.67584900  | 0.61924100  |

### 1-butene – methylperoxy + oxygen adduct

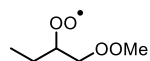

CBS-QB3 Enthalpy= -497.044358 CBS-QB3 Free Energy= -497.095908

|   |   |             |             |             |
|---|---|-------------|-------------|-------------|
| 0 | 2 |             |             |             |
| C |   | -0.12927700 | -0.45699400 | 0.86353800  |
| H |   | 0.19959800  | -0.26873400 | 1.89054600  |
| H |   | -0.34947100 | -1.52147600 | 0.74082100  |
| C |   | 0.96868500  | -0.05759200 | -0.12996100 |
| H |   | 0.59816500  | -0.17563200 | -1.14972400 |
| O |   | -1.31278600 | 0.31523200  | 0.73695000  |
| O |   | -1.91614800 | -0.03786100 | -0.54624000 |
| C |   | -3.22487700 | -0.50013900 | -0.25232300 |
| H |   | -3.66125100 | -0.72085300 | -1.22915800 |
| H |   | -3.81337000 | 0.27443900  | 0.24810500  |
| H |   | -3.20324300 | -1.40918900 | 0.35753100  |
| O |   | 2.05824300  | -1.03705500 | 0.03294000  |
| O |   | 1.73142700  | -2.23088000 | -0.42080900 |
| C |   | 1.61623900  | 1.30551400  | 0.08465700  |
| H |   | 1.90778200  | 1.40169000  | 1.13647300  |
| H |   | 2.54291900  | 1.31948700  | -0.49773500 |
| C |   | 0.72993900  | 2.48599300  | -0.33139100 |
| H |   | -0.18400700 | 2.53209900  | 0.26054300  |
| H |   | 1.27322400  | 3.42542700  | -0.20456300 |
| H |   | 0.43951400  | 2.40656200  | -1.38268400 |

### 1-butene – methylperoxy 1,4-HAT TS

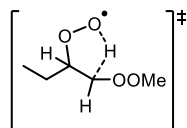

TS freq.: -1930.56 cm<sup>-1</sup>  
CBS-QB3 Enthalpy= -497.001351 CBS-QB3 Free Energy= -497.051660

|   |   |             |             |             |
|---|---|-------------|-------------|-------------|
| 0 | 2 |             |             |             |
| C |   | -0.10747700 | -0.45339000 | 0.38259900  |
| H |   | -0.19274700 | -0.29884000 | 1.46010500  |
| H |   | 0.18903800  | -1.73764800 | 0.16756600  |
| C |   | 1.23333400  | -0.07937300 | -0.27382200 |
| H |   | 1.07794800  | -0.05641400 | -1.36082200 |
| O |   | -1.18097200 | 0.02951700  | -0.31549400 |
| O |   | -2.33198900 | 0.06575800  | 0.58010800  |



|   |             |             |             |
|---|-------------|-------------|-------------|
| C | -3.47352200 | 0.00356700  | -0.26220500 |
| H | -4.31380100 | 0.06256300  | 0.43214200  |
| H | -3.50788400 | -0.93951200 | -0.81414200 |
| H | -3.50224100 | 0.85233700  | -0.95123300 |
| O | 2.05704800  | -1.19301700 | 0.07952900  |
| O | 1.24178400  | -2.32941300 | -0.18489900 |
| C | 1.90665700  | 1.19522600  | 0.21928600  |
| H | 2.03120200  | 1.12611400  | 1.30428600  |
| H | 2.91223100  | 1.22391500  | -0.21266700 |
| C | 1.13847500  | 2.46662300  | -0.15591800 |
| H | 0.14121300  | 2.48367100  | 0.29007500  |
| H | 1.67496400  | 3.35270700  | 0.19066000  |
| H | 1.01831400  | 2.55242300  | -1.23956200 |

1-butene – methoxy + oxygen adduct

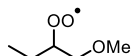

CBS-QB3 Enthalpy= -421.988758 CBS-QB3 Free Energy= -422.036230

|     |             |             |             |
|-----|-------------|-------------|-------------|
| 0 2 |             |             |             |
| C   | -0.44890600 | 0.08855300  | -0.16826400 |
| C   | 0.97088700  | 0.43793200  | 0.26693800  |
| C   | 3.20152000  | -0.27441200 | -0.01394200 |
| H   | 1.19920500  | 1.46195900  | -0.05790900 |
| H   | 1.04711700  | 0.39754800  | 1.36491100  |
| H   | -0.52317200 | 0.15516000  | -1.25611600 |
| H   | 3.37646900  | -0.36364700 | 1.06730100  |
| H   | 3.78279200  | -1.03648100 | -0.53292000 |
| H   | 3.53640400  | 0.71876300  | -0.34323200 |
| O   | 1.84140500  | -0.49538500 | -0.33854200 |
| O   | -1.34619900 | 1.11921000  | 0.37483100  |
| O   | -1.24783100 | 2.26060500  | -0.27763800 |
| C   | -0.95311900 | -1.24771600 | 0.35169400  |
| H   | -0.18803100 | -1.98931900 | 0.10765500  |
| H   | -1.00436600 | -1.19448300 | 1.44518500  |
| C   | -2.30968800 | -1.65869500 | -0.22637400 |
| H   | -2.63168200 | -2.61863800 | 0.18403800  |
| H   | -3.07863400 | -0.91860700 | 0.00592800  |
| H   | -2.25925500 | -1.76166800 | -1.31435500 |

1-butene – methoxy 1,4-HAT TS

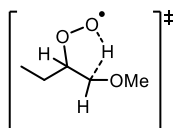

TS freq.: -1942.47 cm<sup>-1</sup>

CBS-QB3 Enthalpy= -421.946700 CBS-QB3 Free Energy= -421.992605

|     |             |             |             |
|-----|-------------|-------------|-------------|
| 0 2 |             |             |             |
| C   | -0.54514000 | 0.05371100  | -0.20538900 |
| C   | 0.90514200  | 0.13925600  | 0.28377500  |
| C   | 3.08263900  | -0.75300200 | 0.08099100  |
| H   | 0.84693300  | 1.45880500  | 0.05760300  |
| H   | 1.04580500  | 0.02829900  | 1.36700700  |
| H   | -0.51805500 | 0.02813600  | -1.30289000 |
| H   | 3.02255200  | -1.24411200 | 1.05859800  |
| H   | 3.63721100  | -1.38265100 | -0.61234000 |
| H   | 3.59107200  | 0.21051100  | 0.18790600  |
| O   | 1.78166200  | -0.57619600 | -0.47683400 |
| O   | -1.08718200 | 1.30128800  | 0.24099600  |
| O   | -0.10909000 | 2.25500400  | -0.15215200 |
| C   | -1.38536600 | -1.08419200 | 0.35580400  |
| H   | -0.86594700 | -2.02040300 | 0.12444500  |
| H   | -1.41139900 | -0.99098200 | 1.44657700  |
| C   | -2.80983100 | -1.11530200 | -0.20887900 |
| H   | -3.37758500 | -1.94797800 | 0.21356000  |
| H   | -3.33946200 | -0.18915700 | 0.02186800  |
| H   | -2.79890700 | -1.23405500 | -1.29622400 |

## **XII. References**

1. A. J. McGrath, G. E. Garrett, L. Valgimigli and D. A. Pratt, *J. Am. Chem. Soc.* 2010, **132**, 16759.
2. J. J. Hanthorn, L. Valgimigli and D. A. Pratt, *J. Org. Chem.* 2012, **77**, 6908.
3. V. A. Golubev and V. D. Sen', *Russ. J. Org. Chem.* 2013, **49**, 555.
4. V. A. Golubev and V. V. Tkachev, V. D. Sen', *Russ. J. Org. Chem.* 2014, **50**, 678.
5. J. Willenbacher, K. N. R. Wuest, J. O. Mueller, M. Kaupp, H. Wagenknecht and C. Barner-Kowollik, *ACS Macro Lett.* 2014, **3**, 574.
6. J. Garcia-Hartjes, J. Dommerholt, T. Wennekes, F. L. van Delft and H. Zuilhof, *Eur. J. Org. Chem.* 2013, **2013**, 3715.
7. L. Brandsma and H. D. Verkruijsse, *Synthesis* 1978, 290.
8. E. A. Haidasz, A. T. Van Kessel and D. A. Pratt, *J. Org. Chem.*, 2016, **81**, 737.
9. J. A. Howard and K. U. Ingold. *Can. J. Chem.* 1965, **43**, 2729.
10. J. A. Howard and K. U. Ingold. *Can. J. Chem.* 1969, **47**, 3809.
11. J. A. Howard and K. U. Ingold. *Can. J. Chem.* 1966, **44**, 1119.
12. J. A. Howard and K. U. Ingold. *Can. J. Chem.* 1967, **45**, 793.
13. J. A. Howard and J. E. Bennett, *Can. J. Chem.* 1972, **50**, 2374.
14. R. Shah and D. A. Pratt. *J. Org. Chem.* 2016, **81**, 6649.
15. J. A. Montgomery, Jr., M. J. Frisch, J. W. Ochterski and G. A. Petersson, *J. Chem. Phys.* 1999, **110**, 2822.
16. M. J. Frisch, G. W. Trucks, H. B. Schlegel, G. E. Scuseria, M. A. Robb, J. R. Cheeseman, G. Scalmani, V. Barone, G. A. Petersson, H. Nakatsuji, X. Li, M. Caricato, A. V. Marenich, J. Bloino, B. G. Janesko, R. Gomperts, B. Mennucci, H. P. Hratchian, J. V. Ortiz, A. F. Izmaylov, J. L. Sonnenberg, D. Williams-Young, F. Ding, F. Lipparini, F. Egidi, J. Goings, B. Peng, A. Petrone, T. Henderson, D. Ranasinghe, V. G. Zakrzewski, J. Gao, N. Rega, G. Zheng, W. Liang, M. Hada, M. Ehara, K. Toyota, R. Fukuda, J. Hasegawa, M. Ishida, T. Nakajima, Y. Honda, O. Kitao, H. Nakai, T. Vreven, K. Throssell, J. A. Montgomery, Jr., J. E. Peralta, F. Ogliaro, M. J. Bearpark, J. J. Heyd, E. N. Brothers, K. N. Kudin, V. N. Staroverov, T. A. Keith, R. Kobayashi, J. Normand, K. Raghavachari, A. P. Rendell, J. C. Burant, S. S. Iyengar, J. Tomasi, M. Cossi, J. M. Millam, M. Klene, C. Adamo, R. Cammi, J. W. Ochterski, R. L. Martin, K. Morokuma, O. Farkas, J. B. Foresman, and D. J. Fox, *Gaussian 16, Revision A.03*, Gaussian, Inc., Wallingford CT, 2016
17. R. T. Skodje, D. G. Truhlar, and B. C. Garrett, *J. Phys. Chem.* 1981, **85**, 3019.
18. R. Lee, G. Gryn'ova, K. U. Ingold and M. L. Coote, *Phys. Chem. Chem. Phys.* 2016, **18**, 23673.
19. H. Isobe, S. Yamanaka, M. Okumura, K. Yamaguchi and J. Shimada, *J. Phys. Chem. B* 2011, **115**, 10730.
